# Supplementary material for: Elevating the upconversion performance of a multiple resonance thermally activated delayed fluorescence emitter via an embedded azepine approach
Source: Royal Society of Chemistry journal article supplement (doi:10.1039/d4sc02351j), 2024-01-01
Supplement: d4sc02351j1.pdf [file d4sc02351j1.pdf]

## Electronic Supplementary Information

Elevating the upconversion performance of a multiple resonance thermally activated delayed fluorescence emitter *via* an embedded azepine approach

Yi-Kuan Chen,<sup>a†</sup> Jian Lei,<sup>a,b†</sup> and Tien-Lin Wu<sup>\*a,c</sup>

E-mail: tlwu@mx.nthu.edu.tw

<sup>a</sup>Department of Chemistry, National Tsing Hua University, No. 101, Sec. 2, Kuang-Fu Rd., Hsinchu 300044, Taiwan.

<sup>b</sup>Institute of Atomic and Molecular Sciences, Academia Sinica, No. 1, Sec. 4, Roosevelt Rd., Taipei, 106319, Taiwan.

<sup>c</sup>College of Semiconductor Research, National Tsing Hua University, No. 101, Sec. 2, Kuang-Fu Rd., Hsinchu 300044, Taiwan.

### Contents

|                                                                   |     |
|-------------------------------------------------------------------|-----|
| <b>1. General Information</b> .....                               | S2  |
| <b>2. Synthetic procedure and characterization</b> .....          | S3  |
| <b>3. Thermal and electrochemical properties</b> .....            | S5  |
| <b>4. Single-crystal X-ray diffraction</b> .....                  | S6  |
| <b>5. Computational methods</b> .....                             | S9  |
| <b>6. Photophysical properties</b> .....                          | S13 |
| <b>7. Transient PL measurement</b> .....                          | S14 |
| <b>8. Circularly polarized properties</b> .....                   | S18 |
| <b>9. OLED device performance</b> .....                           | S21 |
| <b>10. NMR spectra</b> .....                                      | S26 |
| <b>11. HPLC data</b> .....                                        | S31 |
| <b>12. Calculated absorption properties</b> .....                 | S32 |
| <b>13. Optimized geometries and vibrational frequencies</b> ..... | S36 |
| <b>14. References</b> .....                                       | S82 |

## 1. General Information

All chemicals and reagents were purchased from commercial providers without further purification.  $^1\text{H}$  NMR,  $^{13}\text{C}$  NMR and  $^{11}\text{B}$  NMR spectra were measured on Varian INOVA-500 and JEOL ECZ500R/S1 NMR spectrometers. Mass spectra were performed on JMS-T200GC AccuTOF GCx HRMS. Elemental analyses were performed using an analyzer (Vario EL III CHN-OS Rapid, Elementar). UV-vis absorption spectra were recorded on a Hitachi U-3300 spectrophotometer. Fluorescence was recorded on a Hitachi F-7000 fluorescence spectrophotometer. Thermal gravimetric analysis (TGA) and differential scanning calorimetry (DSC) were performed on a thermal analyzer (2-HT, Mettler-Toledo and Q10) at a heating rate of 10 °C/min. from 30 °C to 800 °C under nitrogen. Transient PL decay curves and phosphorescence spectra were obtained using an Edinburgh FLS980 instrument. The delayed time for the phosphorescence spectra was 6.25 milliseconds. The excitation light source for the delayed decay curves was 60 W, pulsed xenon microsecond flashlamp. The pulse widths of the nanosecond and microsecond flash lamp were within 1 ns and 1-2  $\mu\text{s}$ , with the repetition rates (frequency) of 40 kHz and 100 Hz, respectively. Excitation and detection wavelengths were 340 and 470 nm, respectively. The channels applied for the prompt (100 ns) and the delayed (400  $\mu\text{s}$ ) decay curve were 4096 and 8000, respectively. The prompt and delayed lifetimes were fitted by FLS980 software. The HOMO levels of compounds were determined with an electrochemical analyzer (CHI600, CH Instruments). The absolute photoluminescence quantum yields (PLQYs) of the thin films were determined using an integrating sphere system (LQ-100X-PL) under a  $\text{N}_2$  atmosphere. The PLQYs in degassed solution were obtained using 9,10-diphenylanthracene as standard. The X-ray diffraction was carried out on an X-ray diffractometer (Rigaku XtaLAB Synergy DW). The chiral separation of MR emitter, TAzBN, was completed in Daicel Chiral Technologies (China) Co., Ltd. by HPLC using Chiralpak IE column. The ee% of both enantiomers were over 98%. Circular Dichroism spectra (CD) were obtained on a JASCO J-1500 spectrometer, whereas Circular polarized luminescence (CPL) spectra were recorded on a JASCO CPL-300 spectrometer. Permanent magnets (JASCO PM-491) with various magnetic field strengths were used with a scattering angle of 0°. The device performance was measured by a spectroradiometer, CS-2000A instrument.

## 2. Synthetic procedure and characterization

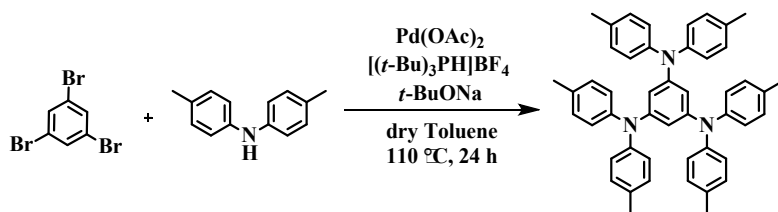

Synthesis of *N*<sup>1</sup>,*N*<sup>1</sup>,*N*<sup>3</sup>,*N*<sup>3</sup>,*N*<sup>5</sup>,*N*<sup>5</sup>-hexa-*p*-tolylbenzene-1,3,5-triamine (TTA): 1,3,5-tribromobenzene (1.000 g, 4.80 mmol), di-*p*-tolylamine (1.880 g, 9.53 mmol), palladium acetate (0.107 g, 0.48 mmol), tri-*tert*-butylphosphonium tetrafluoroborate (0.140 g, 0.48 mmol), and sodium *tert*-butoxide (1.832 g, 19.06 mmol) were added to the pressure tube. The dry toluene (16 mL) was added to the mixture and degassed. Then, the solution was refluxed for 24 hours. After, the mixtures were cooled down, filtered through the celite, and washed with dichloromethane. The solution was evaporated, and the crude was purified by column chromatography (eluent: dichloromethane/hexane = 1/5) to obtain the white solid (1.810 g, yield: 85.8%). <sup>1</sup>H NMR (500 MHz, CDCl<sub>3</sub>) δ 6.92 (d, *J* = 8.5 Hz, 12H), 6.87 (d, *J* = 8.5 Hz, 12H), 6.25 (s, 3H), 2.22 (s, 18H). <sup>13</sup>C NMR (125 MHz, CDCl<sub>3</sub>) δ 148.99, 145.00, 131.67, 129.49, 123.88, 112.79, 20.70. FD-MS calcd for C<sub>48</sub>H<sub>45</sub>N<sub>3</sub>: 663.36080. Found: 663.36017.

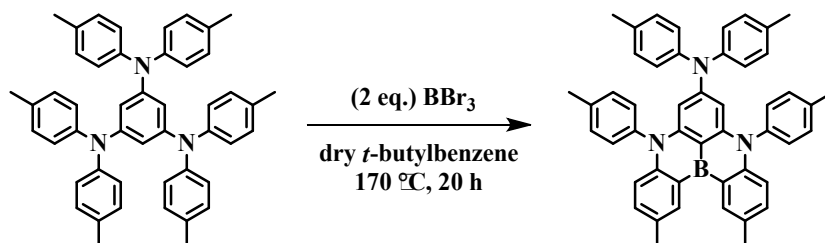

Synthesis of **TTA-BN**: *N*<sup>1</sup>,*N*<sup>1</sup>,*N*<sup>3</sup>,*N*<sup>3</sup>,*N*<sup>5</sup>,*N*<sup>5</sup>-hexa-*p*-tolylbenzene-1,3,5-triamine (TTA) (0.500 g, 0.75 mmol) and dry *tert*-butyl benzene (7.5 mL) were added to the pressure tube. The boron tribromide (0.377 g, 1.51 mmol) was slowly added in glovebox, and the solution was stirred at 170 °C for 20 hours. After, the mixtures were cooled down to room temperature, and *N,N*-diisopropylethylamine (0.389 g, 3.01 mmol) was added slowly in ice bath for 0.5 hour. The solution was extracted with dichloromethane and water three times, then the solvent was evaporated. The crude was purified by column chromatography (eluent: dichloromethane/hexane = 1/3) to obtain the yellow powder (0.344 g, yield: 67.9%), and the solid was further purified by gradient sublimation. <sup>1</sup>H NMR (500 MHz, CDCl<sub>3</sub>) δ 8.67 (s, 2H), 7.24 (d, *J* = 7.5 Hz, 6H), 7.15 (dd, *J* = 9.0, 2.0 Hz, 2H), 7.05 (d, *J* = 8.5 Hz, 4H), 6.87 (d, *J* = 8.0 Hz, 4H), 6.81 (d, *J* = 8.0 Hz, 4H), 6.66 (d, *J* = 8.5 Hz, 2H), 2.49 (s, 6H), 2.37 (s, 6H), 2.25 (s, 6H). <sup>13</sup>C NMR (125 MHz, CDCl<sub>3</sub>) δ 151.04,

147.99, 145.92, 143.90, 139.80, 137.58, 134.61, 133.02, 131.33, 129.94, 129.30, 128.20, 125.95, 116.70, 96.49, 21.11, 21.06, 20.78.  $^{11}\text{B}$  NMR (160 MHz,  $\text{CDCl}_3$ )  $\delta$  37.6. FD-MS calcd for  $\text{C}_{48}\text{H}_{42}\text{BN}_3$ : 671.34773. Found: 671.34804. Anal. cal for  $\text{C}_{48}\text{H}_{42}\text{BN}_3$ : N 6.26, C 85.83, H 6.30. Found N 6.30, C 86.03, H 6.31.

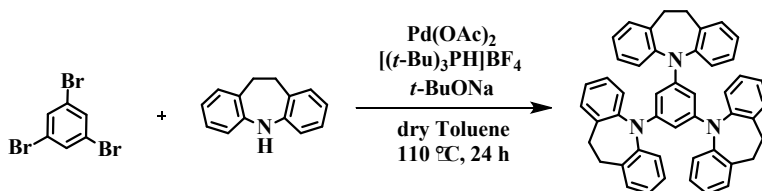

Synthesis of **1,3,5-tris(10,11-dihydro-5H-dibenzo[*b,f*]azepin-5-yl)benzene (TAz)**: 1,3,5-tribromobenzene (0.500 g, 1.60 mmol), 10,11-dihydro-5H-dibenzo[*b,f*]azepine (0.931 g, 4.80 mmol), palladium acetate (0.053 g, 0.24 mmol), tri-*tert*-butylphosphonium tetrafluoroborate (0.069 g, 0.24 mmol), and sodium *tert*-butoxide (0.920 g, 9.60 mmol) were added to the two-neck flask, then the system was degassed. The dry toluene (8 mL) was added to the mixture, then the solution was refluxed under nitrogen for 24 hours. After, the mixtures were cooled down, diluted with dichloromethane, and filtered through the celite. The solution was evaporated, and the crude was purified by column chromatography (eluent: dichloromethane/hexane = 1/3) to obtain the white solid (0.870 g, yield: 83.3%).  $^1\text{H}$  NMR (500 MHz,  $\text{CDCl}_3$ )  $\delta$  7.13 (d,  $J = 7.0$  Hz, 6H), 7.04 (d,  $J = 7.0$  Hz, 6H), 6.96 (td,  $J = 7.0, 1.0$  Hz, 6H), 6.90 (t,  $J = 7.0, 1.0$  Hz, 6H), 5.22 (s, 3H), 2.88 (s, 12H).  $^{13}\text{C}$  NMR (125 MHz,  $\text{CDCl}_3$ )  $\delta$  149.98, 143.54, 137.86, 130.06, 129.75, 126.11, 126.07, 89.85, 30.99. FD-MS calcd for  $\text{C}_{48}\text{H}_{39}\text{N}_3$ : 657.31385. Found: 657.31489.

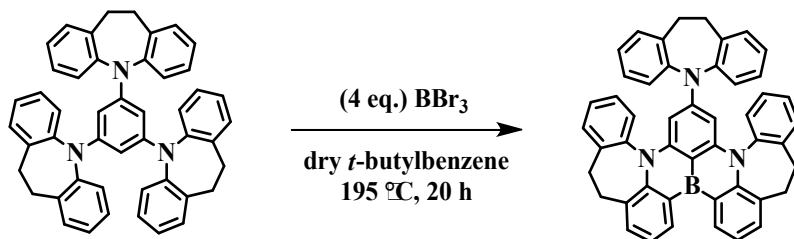

Synthesis of **TAzBN**: 1,3,5-tris(10,11-dihydro-5H-dibenzo[*b,f*]azepin-5-yl)benzene (**TAz**) (1.000 g, 1.52 mmol) and dry *tert*-butyl benzene (10 mL) were added to the pressure tube. The boron tribromide (1.523 g, 6.08 mmol) was added slowly in the glovebox, and the solution was stirred at 195 °C for 20 hours. After, the mixtures were cooled down to room temperature, and *N,N*-diisopropylethylamine (1.572 g, 12.16 mmol) was added slowly in ice bath for 0.5 hour. The solution was extracted with dichloromethane and water three times, then the solvent was evaporated. The crude was purified by column chromatography (eluent: dichloromethane/hexane

= 1/4) to obtain the yellow powder (0.234 g, yield: 23.1%), and the solid was further purified by gradient sublimation.  $^1\text{H}$  NMR (500 MHz,  $\text{CDCl}_3$ )  $\delta$  8.39 (d,  $J = 7.0$  Hz, 2H), 7.27 (d,  $J = 7.5$  Hz, 2H), 7.16 (t,  $J = 7.5$  Hz, 2H), 7.13 (d,  $J = 7.5$  Hz, 2H), 7.04 – 6.98 (m, 8H), 6.93 (t,  $J = 7.5$  Hz, 2H), 6.88 (t,  $J = 7.5$  Hz, 2H), 6.76 (d,  $J = 8.0$  Hz, 2H), 5.46 (s, 2H), 3.62 (t,  $J = 13.5$  Hz, 2H), 3.36 (d,  $J = 17.0$  Hz, 2H), 3.21 (t,  $J = 14.5$  Hz, 2H), 2.85 – 2.76 (m, 4H), 2.71 (d,  $J = 13.0$  Hz, 2H).  $^{13}\text{C}$  NMR (125 MHz,  $\text{CDCl}_3$ )  $\delta$  152.05, 150.61, 147.46, 146.63, 142.71, 140.94, 137.64, 134.06, 132.82, 130.33, 129.21, 129.13, 128.75, 126.79, 126.75, 126.73, 126.41, 121.30, 96.52, 37.50, 30.64, 30.52.  $^{11}\text{B}$  NMR (160 MHz,  $\text{CDCl}_3$ )  $\delta$  40.9. FD-MS calcd for  $\text{C}_{48}\text{H}_{36}\text{BN}_3$ : 665.30078. Found: 665.30148. Anal. cal for  $\text{C}_{48}\text{H}_{36}\text{BN}_3$ : N 6.31, C 86.61, H 5.45. Found N 6.28, C 86.64, H 5.47.

### 3. Thermal and electrochemical properties

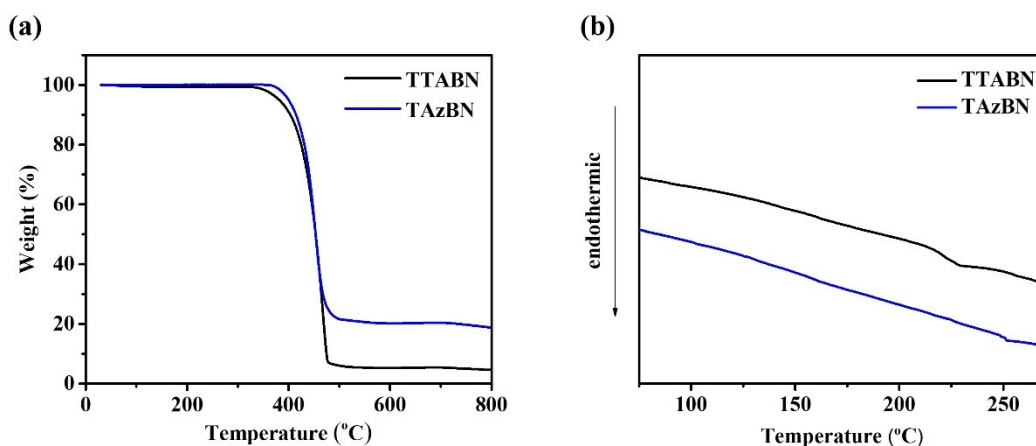

**Fig. S1** (a) Thermal gravimetric analysis (TGA) and (b) differential scanning calorimetry (DSC) analysis of TTABN and TAzBN.

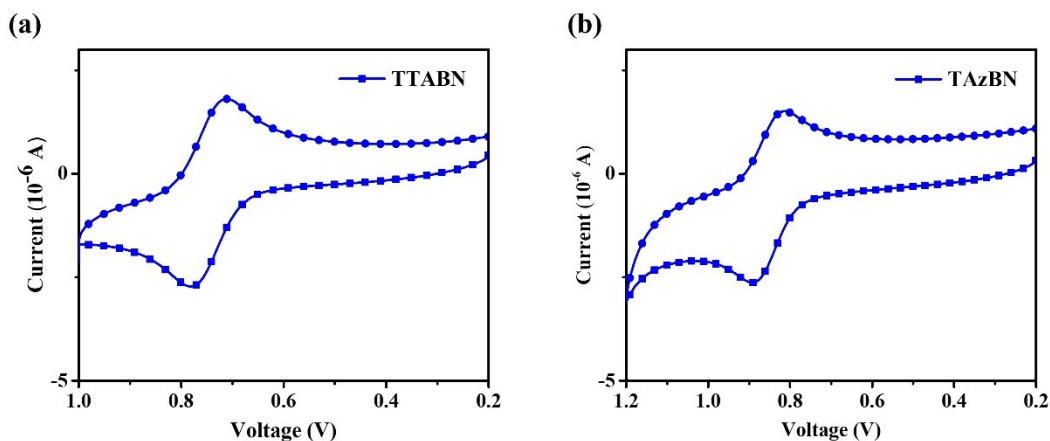

**Fig. S2** Cyclic voltammograms of (a) TTABN, and (b) TAzBN in dichloromethane.

#### 4. Single-crystal X-ray diffraction

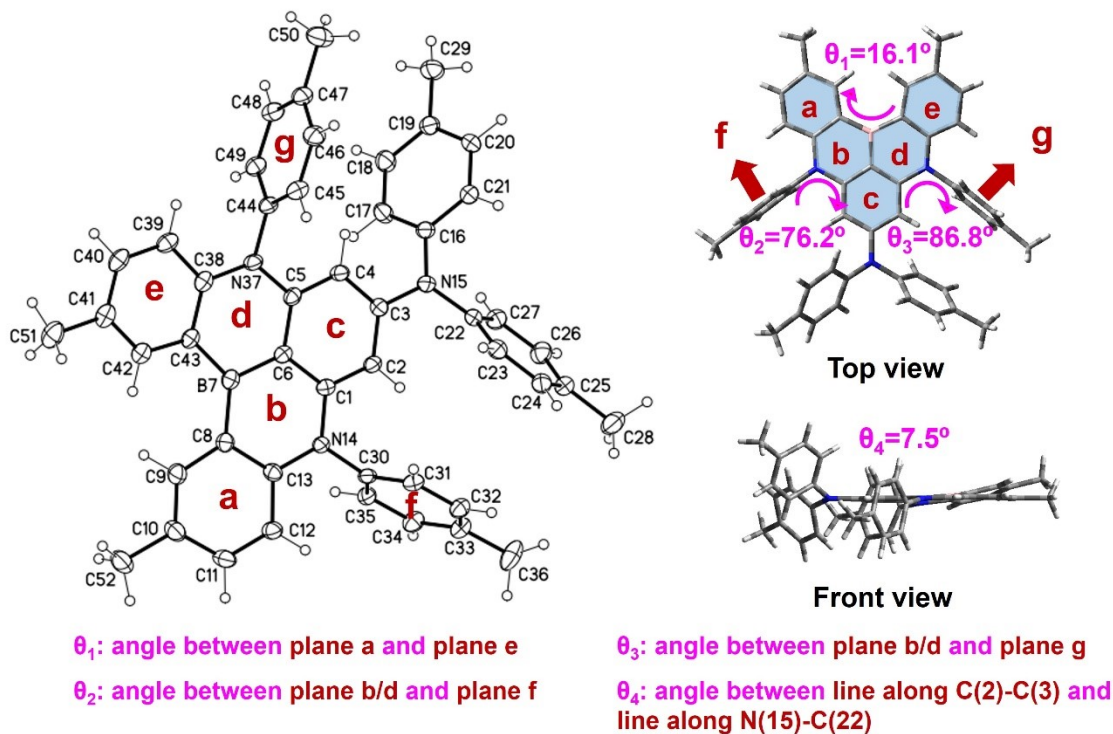

**Fig. S3** Single crystal structure of TTABN and related dihedral angles.

**Table S1** Crystal data and structure refinement for TTABN.

|                                    |                                       |
|------------------------------------|---------------------------------------|
| Empirical formula                  | $C_{96}H_{84}B_2N_6$                  |
| Formula weight                     | 1343.31                               |
| Temperature/K                      | 99.98(12)                             |
| Crystal system                     | monoclinic                            |
| Space group                        | $P2_1/c$                              |
| $a/\text{\AA}$                     | 14.7232(2)                            |
| $b/\text{\AA}$                     | 9.88890(10)                           |
| $c/\text{\AA}$                     | 51.6585(6)                            |
| $\alpha/^\circ$                    | 90                                    |
| $\beta/^\circ$                     | 94.7230(10)                           |
| $\gamma/^\circ$                    | 90                                    |
| Volume/ $\text{\AA}^3$             | 7495.75(15)                           |
| Z                                  | 4                                     |
| $\rho_{\text{calc}}/\text{g/cm}^3$ | 1.190                                 |
| $\mu/\text{mm}^{-1}$               | 0.523                                 |
| F(000)                             | 2848.0                                |
| Crystal size/ $\text{mm}^3$        | $0.08 \times 0.06 \times 0.03$        |
| Radiation                          | Cu K $\alpha$ ( $\lambda = 1.54184$ ) |

|                                                  |                                                                |
|--------------------------------------------------|----------------------------------------------------------------|
| 2 $\theta$ range for data collection/ $^{\circ}$ | 6.024 to 134.15                                                |
| Index ranges                                     | $-15 \leq h \leq 17, -11 \leq k \leq 11, -61 \leq l \leq 61$   |
| Reflections collected                            | 54420                                                          |
| Independent reflections                          | 13332 [ $R_{\text{int}} = 0.0282, R_{\text{sigma}} = 0.0264$ ] |
| Data/restraints/parameters                       | 13332/0/950                                                    |
| Goodness-of-fit on $F^2$                         | 1.118                                                          |
| Final R indexes [ $I \geq 2\sigma(I)$ ]          | $R_1 = 0.0539, wR_2 = 0.1342$                                  |
| Final R indexes [all data]                       | $R_1 = 0.0629, wR_2 = 0.1385$                                  |
| Largest diff. peak/hole / $e \text{ \AA}^{-3}$   | 0.36/-0.28                                                     |

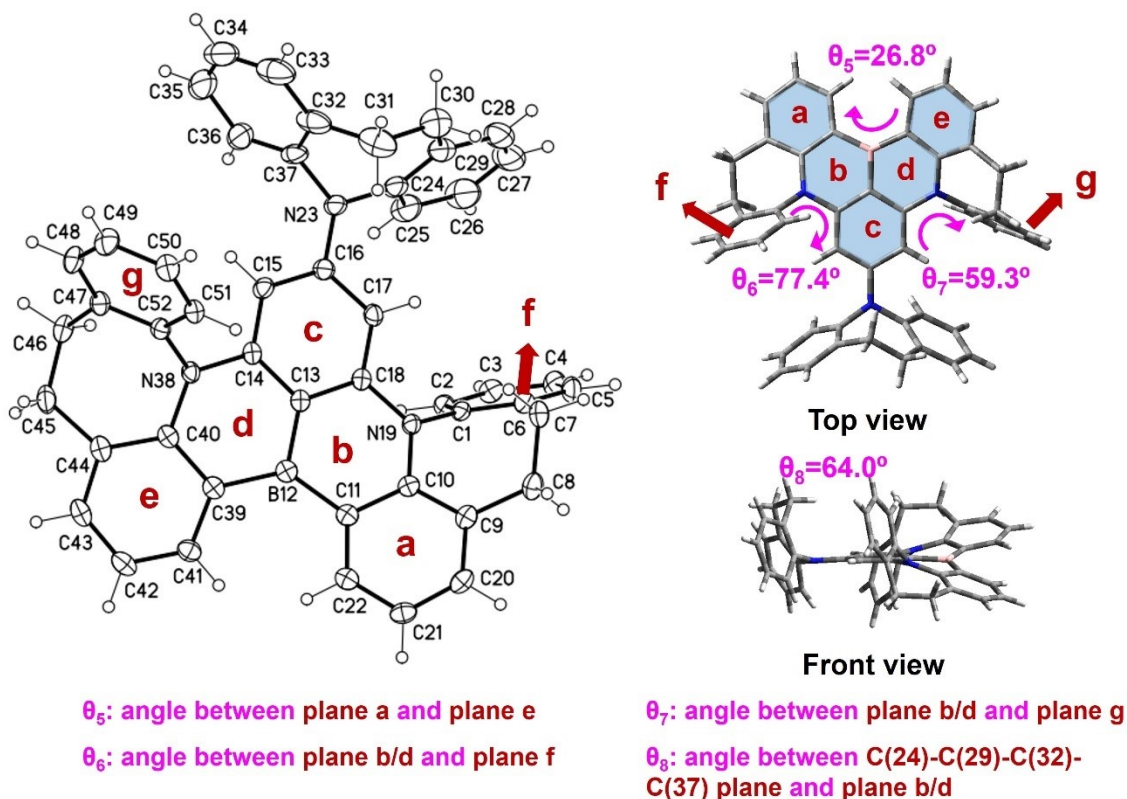

**Fig. S4** Single crystal structure of TazBN and related dihedral angles.

**Table S2** Crystal data and structure refinement for TazBN.

|                   |                    |
|-------------------|--------------------|
| Empirical formula | $C_{48}H_{36}BN_3$ |
| Formula weight    | 665.61             |
| Temperature/K     | 100.00(10)         |
| Crystal system    | orthorhombic       |
| Space group       | Pbca               |
| a/ $\text{\AA}$   | 20.72780(13)       |
| b/ $\text{\AA}$   | 13.75053(9)        |
| c/ $\text{\AA}$   | 25.09061(16)       |

|                                               |                                                               |
|-----------------------------------------------|---------------------------------------------------------------|
| $\alpha/^\circ$                               | 90                                                            |
| $\beta/^\circ$                                | 90                                                            |
| $\gamma/^\circ$                               | 90                                                            |
| Volume/ $\text{\AA}^3$                        | 7151.28(8)                                                    |
| Z                                             | 8                                                             |
| $\rho_{\text{calc}}/\text{g/cm}^3$            | 1.236                                                         |
| $\mu/\text{mm}^{-1}$                          | 0.548                                                         |
| F(000)                                        | 2800.0                                                        |
| Crystal size/ $\text{mm}^3$                   | $0.17 \times 0.14 \times 0.04$                                |
| Radiation                                     | Cu K $\alpha$ ( $\lambda = 1.54184$ )                         |
| $2\theta$ range for data collection/ $^\circ$ | 7.046 to 134.156                                              |
| Index ranges                                  | $-23 \leq h \leq 24, -16 \leq k \leq 15, -28 \leq l \leq 29$  |
| Reflections collected                         | 42604                                                         |
| Independent reflections                       | 6377 [ $R_{\text{int}} = 0.0236, R_{\text{sigma}} = 0.0160$ ] |
| Data/restraints/parameters                    | 6377/0/470                                                    |
| Goodness-of-fit on $F^2$                      | 1.038                                                         |
| Final R indexes [ $I \geq 2\sigma(I)$ ]       | $R_1 = 0.0408, wR_2 = 0.1091$                                 |
| Final R indexes [all data]                    | $R_1 = 0.0454, wR_2 = 0.1125$                                 |
| Largest diff. peak/hole / $e \text{\AA}^{-3}$ | 0.49/-0.25                                                    |

(a) TTABN

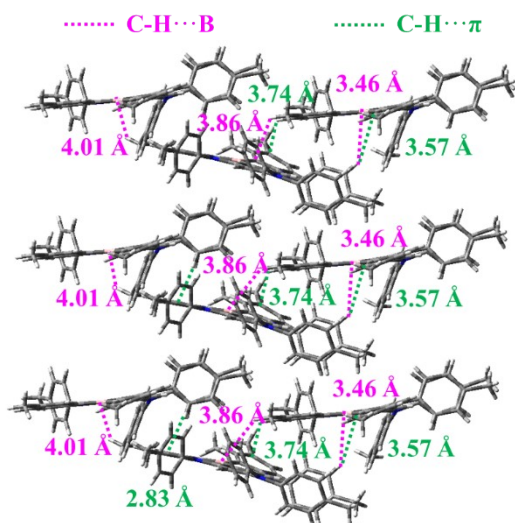

(b) TAZBN

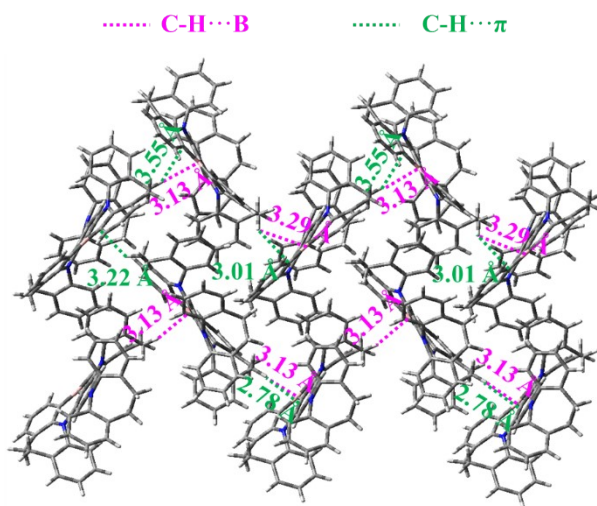

**Fig. S5** Molecular packing pattern of (a) TTABN and (b) TAZBN.



## 5. Computational methods

In this work, the electronic structures of two emitters were calculated with Gaussian 16<sup>1</sup> unless specified otherwise. The ground state ( $S_0$ ) geometries were optimized using the density functional theory (DFT). The time-dependent density functional theory (TD-DFT) and Tamm-Dancoff approximated density functional theory (TDA-DFT) were used to optimize the geometries of the first excited singlet state ( $S_1$ ) and the triplet excited states ( $T_1$ ,  $T_2$ , and  $T_3$ ).<sup>2</sup> We utilized the polarizable continuum model (PCM)<sup>3</sup> and the two-layer ONIOM model<sup>4</sup> of the quantum mechanics/molecular mechanics (QM/MM) method, respectively, to simulate basic photophysical data in toluene and the solid phase. As shown **Figure S6b**, the innermost molecule was found to be the higher layer by the accurate high-level QM method, and the outermost molecules were treated as the lower layer using the efficient universal force field (UFF) method.<sup>5</sup> In the QM/MM geometry optimization process, only the atoms in the QM part can move and others in the MM part were frozen. The initial geometries of TTABN and TAZBN in the solid phase were based on the measured crystalline structures. Several functionals with different percentages of Hartree-Fock exchange (HF%), including B3LYP (20%), PBE0 (25%), BMK (42%), M06-2X (54%), CAM-B3LYP (19% HF at short range and 65% HF at long range), and  $\omega$ B97XD (22.2% HF at short range and 100% HF at long range) are tested.<sup>2,6,7</sup> It should be noted that most of the experimental  $\Delta E_{ST}$  values are deduced from fluorescence and phosphorescence spectra as shown in **Figure S7a**.<sup>2</sup> The computational results of the vertical absorption energy ( $\Delta E_{VA}$ ), vertical emission energy ( $\Delta E_{VE}$ ), adiabatic energy ( $\Delta E_{AD}$ ), and the energy gap ( $\Delta E_{ST}$ ) were calculated as shown in **Figure S7b**. We carried out calculations of the adiabatic  $\Delta E_{ST-AD}$  values, which are defined as the energy differences between the minima potential energies of the  $S_1$  and  $T_1/T_2/T_3$  states. The absorption and emission wavelengths ( $\lambda_{abs}$  and  $\lambda_{em}$ ) were calculated using the TD-B3LYP/6-31G(d) method based on optimized the ground and excited states, respectively. Absorption and emission spectra were simulated by TD-DFT based on vertical energies at the stable geometry structures. It was found that the emission wavelength changes significantly when functionals were different, and the best approach for calculating the absorption peak ( $\lambda_{abs}(S_1)$ ), emission peak ( $\lambda_{em}(S_1)$ ), and the first adiabatic singlet excited energy ( $\Delta E_{AD}(S_1)$ ) was B3LYP/6-31G (d) (**Table S3**). The adoption of the TDA-DFT with B3LYP is appropriate for calculations of the adiabatic excited state energies and the corresponding singlet-triplet gap. Vibrational frequency analyses were carried out to confirm the local minima which showed no imaginary frequency. Consequently, the B3LYP functional and the 6-31G(d) basis set are adopted to calculate excited states in our calculations. The spin-orbit coupling (SOC) matrix between  $S_1$  and  $T_n$  ( $n=1-3$ ) states were calculated with the optimized geometries of  $S_1$ ,  $T_1$ ,  $T_2$ , and  $T_3$  by the ORCA program, respectively.<sup>8</sup>

(a) PCM (Solvent = Toluene)

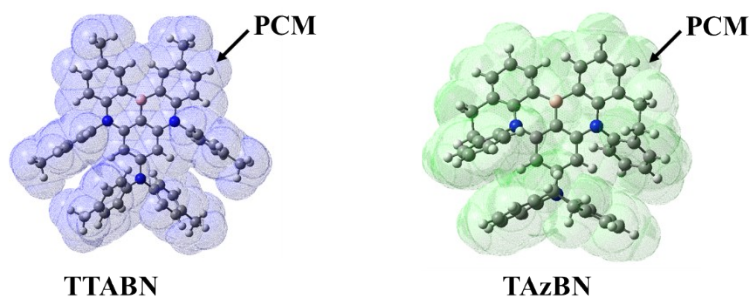

(b) ONIOM model

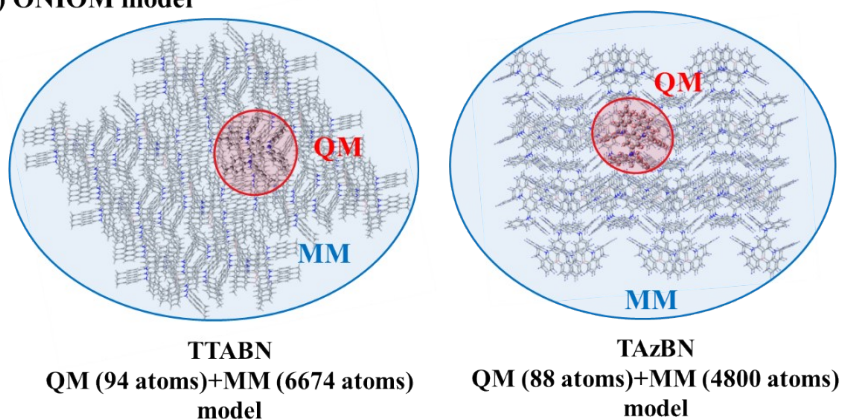

**Fig. S6** (a) PCM model: (solvent = toluene) of TTABN and TAzBN. (b) ONIOM model: single TTABN or TAzBN molecule is treated as the high layer (QM), respectively, and surrounding molecules are regarded as the low layer (MM).

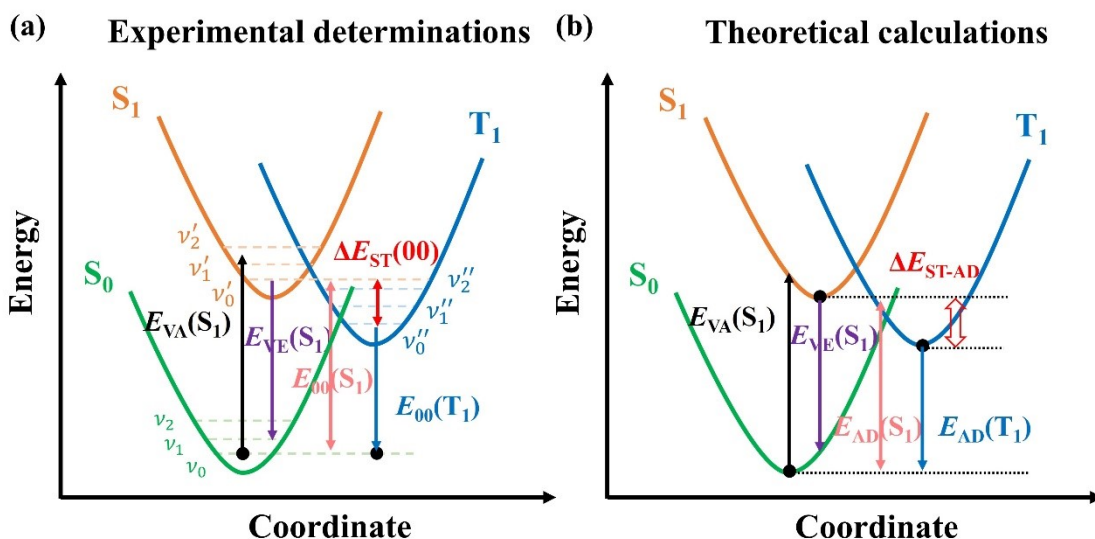

**Fig. S7** Schematic potential energy surfaces of the photophysical processes for (a) experimental determinations and (b) theoretical calculations.  $S_0$  is the singlet ground state;  $S_1$  is the lowest singlet excited state;  $T_1$  is the lowest triplet excited state; VA: vertical absorption; VE: vertical emission; AD: adiabatic;  $\Delta E_{ST-AD}$  is the adiabatic energy gap between  $S_1$  and  $T_1$ .

**Table S3** Calculated excited-state characteristics of TTABN and TAzBN in toluene and the solid phase.

| Method          | $\Delta E_{VA}(S_1)^a$<br>[eV] | $\Delta E_{VE}(S_1)^b$<br>[eV] | $\Delta E_{AD}(S_1)^c$<br>[eV] | $\lambda_{abs}(S_1)^d$<br>[nm] | $\lambda_{em}(S_1)^e$<br>[nm] | $\Delta\lambda^f$<br>[nm] | HOMO <sup>g</sup><br>[eV] | LUMO <sup>g</sup><br>[eV] |
|-----------------|--------------------------------|--------------------------------|--------------------------------|--------------------------------|-------------------------------|---------------------------|---------------------------|---------------------------|
| TTABN (Toluene) |                                |                                |                                |                                |                               |                           |                           |                           |
| B3LYP           | 3.06                           | 2.87                           | 2.97                           | 405                            | 432                           | 27                        | -4.71                     | -1.25                     |
| PBE0            | 3.17                           | 2.98                           | 3.08                           | 391                            | 416                           | 25                        | -4.96                     | -1.18                     |
| BMK             | 3.36                           | 3.19                           | 3.28                           | 369                            | 388                           | 19                        | -5.41                     | -0.71                     |
| CAM-B3LYP       | 3.57                           | 3.40                           | 3.48                           | 348                            | 365                           | 17                        | -5.93                     | -0.14                     |
| M06-2X          | 3.51                           | 3.34                           | 3.43                           | 353                            | 371                           | 18                        | -5.90                     | -0.51                     |
| $\omega$ B97X-D | 3.62                           | 3.45                           | 3.54                           | 343                            | 359                           | 17                        | -6.49                     | -0.29                     |
| TAzBN (Toluene) |                                |                                |                                |                                |                               |                           |                           |                           |
| B3LYP           | 3.03                           | 2.74                           | 2.89                           | 410                            | 452                           | 43                        | -4.82                     | -1.38                     |
| PBE0            | 2.90                           | 2.50                           | 2.70                           | 428                            | 495                           | 68                        | -5.17                     | -1.44                     |
| BMK             | 3.36                           | 3.11                           | 3.24                           | 369                            | 399                           | 30                        | -5.54                     | -0.82                     |
| CAM-B3LYP       | 3.58                           | 3.37                           | 3.47                           | 347                            | 368                           | 22                        | -6.09                     | -0.08                     |
| M06-2X          | 3.54                           | 3.31                           | 3.43                           | 351                            | 374                           | 24                        | -6.09                     | -0.50                     |
| $\omega$ B97X-D | 3.62                           | 3.42                           | 3.52                           | 343                            | 363                           | 20                        | -6.70                     | -0.29                     |
| TTABN (Solid)   |                                |                                |                                |                                |                               |                           |                           |                           |
| B3LYP           | 3.05                           | 2.86                           | 2.97                           | 406                            | 433                           | 27                        | -4.51                     | -0.92                     |
| PBE0            | 3.16                           | 2.98                           | 3.09                           | 392                            | 416                           | 24                        | -4.68                     | -0.97                     |
| BMK             | 3.37                           | 3.21                           | 3.30                           | 368                            | 387                           | 18                        | -5.12                     | -0.48                     |
| CAM-B3LYP       | 3.58                           | 3.44                           | 3.52                           | 347                            | 360                           | 14                        | -5.67                     | 0.05                      |
| M06-2X          | 3.52                           | 3.37                           | 3.45                           | 353                            | 368                           | 15                        | -5.64                     | -0.34                     |
| $\omega$ B97X-D | 3.61                           | 3.49                           | 3.56                           | 343                            | 356                           | 13                        | -6.25                     | 0.60                      |
| TAzBN (Solid)   |                                |                                |                                |                                |                               |                           |                           |                           |
| B3LYP           | 3.03                           | 2.74                           | 2.91                           | 409                            | 453                           | 44                        | -4.70                     | -1.10                     |
| PBE0            | 3.15                           | 2.87                           | 3.04                           | 393                            | 432                           | 39                        | -4.94                     | -1.01                     |
| BMK             | 3.37                           | 3.13                           | 3.28                           | 368                            | 396                           | 29                        | -5.39                     | -0.53                     |
| CAM-B3LYP       | 3.59                           | 3.39                           | 3.51                           | 345                            | 366                           | 21                        | -5.98                     | 0.02                      |
| M06-2X          | 3.54                           | 3.32                           | 3.46                           | 350                            | 373                           | 23                        | -5.94                     | -0.37                     |
| $\omega$ B97X-D | 3.63                           | 3.44                           | 3.56                           | 341                            | 360                           | 19                        | -6.55                     | 0.57                      |

<sup>a</sup>The vertical absorption energy. <sup>b</sup>The vertical emission energy. <sup>c</sup>The adiabatic energy. <sup>d</sup>The absorption wavelength. <sup>e</sup>The emission wavelength. <sup>f</sup>Stokes shift  $\Delta\lambda = \lambda_{em}(S_1) - \lambda_{abs}(S_1)$  <sup>g</sup>The energy level of HOMO and LUMO.

**Table S4** Calculated adiabatic energies of TTABN and TAzBN in toluene and the solid phase at B3LYP/6-31G(d).

| Molecule | Method <sup>a</sup> | $\Delta E_{AD}(S_1)^b$<br>[eV] | $\Delta E_{AD}(T_1)^c$<br>[eV] | $\Delta E_{AD}(T_2)^d$<br>[eV] | $\Delta E_{AD}(T_3)^e$<br>[eV] | $\Delta E_{S_1T_1}^f$<br>[eV] | $\Delta E_{S_1T_2}^f$<br>[eV] | $\Delta E_{S_1T_3}^f$<br>[eV] |
|----------|---------------------|--------------------------------|--------------------------------|--------------------------------|--------------------------------|-------------------------------|-------------------------------|-------------------------------|
| Toluene  |                     |                                |                                |                                |                                |                               |                               |                               |
| TTABN    | TD                  | 2.97                           | 2.54                           | 2.78                           | 3.04                           | 0.43                          | 0.19                          | -0.07                         |
|          | TDA                 | 2.97                           | 2.56                           | 2.88                           | 3.12                           | 0.41                          | 0.09                          | -0.15                         |
| TAzBN    | TD                  | 2.93                           | 2.56                           | 2.83                           | 3.10                           | 0.37                          | 0.10                          | -0.16                         |
|          | TDA                 | 2.95                           | 2.58                           | 2.93                           | 3.05                           | 0.37                          | 0.02                          | -0.10                         |
| Solid    |                     |                                |                                |                                |                                |                               |                               |                               |
| TTABN    | TD                  | 2.97                           | 2.56                           | 2.87                           | 3.08                           | 0.42                          | 0.11                          | -0.11                         |
|          | TDA                 | 3.04                           | 2.58                           | 2.94                           | 3.15                           | 0.46                          | 0.10                          | -0.11                         |
| TAzBN    | TD                  | 2.91                           | 2.56                           | 2.82                           | 3.14                           | 0.36                          | 0.09                          | -0.23                         |
|          | TDA                 | 2.91                           | 2.58                           | 2.90                           | 3.21                           | 0.33                          | 0.01                          | -0.30                         |

<sup>a</sup>The time-dependent density functional theory (TD-DFT) and Tamm-Dancoff approximated density functional theory (TDA-DFT). <sup>b</sup>The adiabatic energy of  $S_1$ . <sup>c</sup>The adiabatic energy of  $T_1$ . <sup>d</sup>The adiabatic energy of  $T_2$ . <sup>e</sup>The adiabatic energy of  $T_3$ . <sup>f</sup>The energy gap between  $S_1$  and  $T_1/T_2/T_3$ .

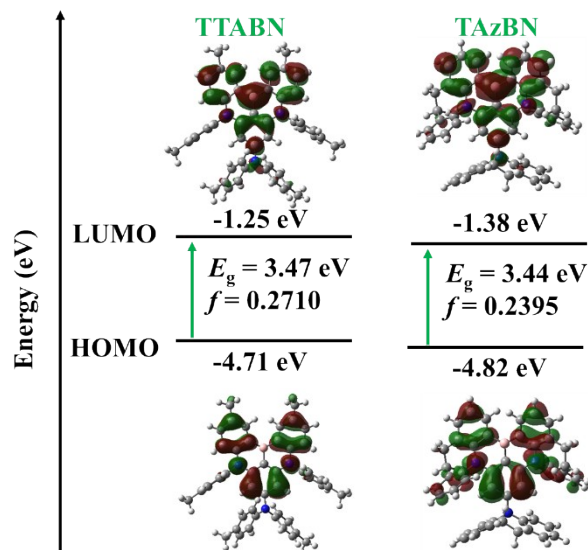

**Fig. S8** Calculated HOMO and LUMO distributions, energy level gaps ( $E_g$ ), oscillator strengths ( $f$ ) of TTABN and TAzBN by TD-DFT at B3LYP/6-31G(d) in toluene.

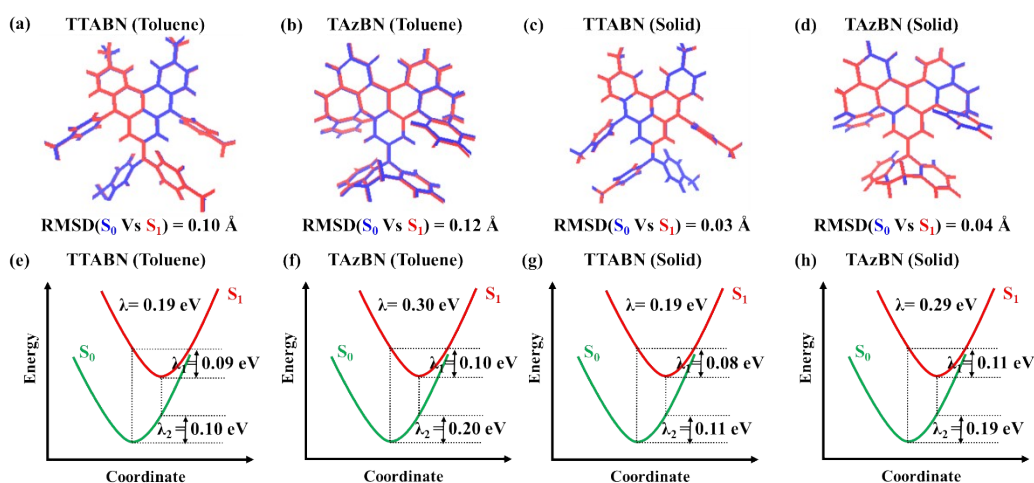

**Fig. S9** Geometric root-mean-square deviation (RMSD) between optimized  $S_0$  (blue) and  $S_1$  (red) states of (a)TTABN and (b)TAzBN in toluene, (c)TTABN and (d)TAzBN in the solid phase, respectively. Reorganization energies with optimized  $S_0$  and  $S_1$  geometries of (e)TTABN and (f)TAzBN in toluene, (g)TTABN and (h)TAzBN in the solid phase, respectively, by TD-DFT.

**Table S5** Calculated spin-orbit coupling (SOC) matrix elements of TTABN and TAzBN in toluene.

| Molecule<br>Geometry <sup>a</sup> | TTABN           |                 |                 | TAzBN           |                 |                 |
|-----------------------------------|-----------------|-----------------|-----------------|-----------------|-----------------|-----------------|
|                                   | SOC( $S_1T_1$ ) | SOC( $S_1T_2$ ) | SOC( $S_1T_3$ ) | SOC( $S_1T_1$ ) | SOC( $S_1T_2$ ) | SOC( $S_1T_3$ ) |
| $S_1$                             | 0.03            | 0.14            | 0.01            | 0.08            | 1.33            | 0.10            |
| $T_1$                             | 0.03            | 0.13            | 0.00            | 0.10            | 1.28            | 0.07            |
| $T_2$                             | 0.04            | 0.25            | 0.03            | 0.14            | 1.02            | 0.07            |
| $T_3$                             | 0.04            | 0.18            | 0.03            | 0.13            | 1.02            | 0.30            |

<sup>a</sup>At the position of the optimized  $S_1/T_1/T_2/T_3$  geometries by TDA-DFT at B3LYP/6-31G(d), respectively.



## 6. Photophysical properties

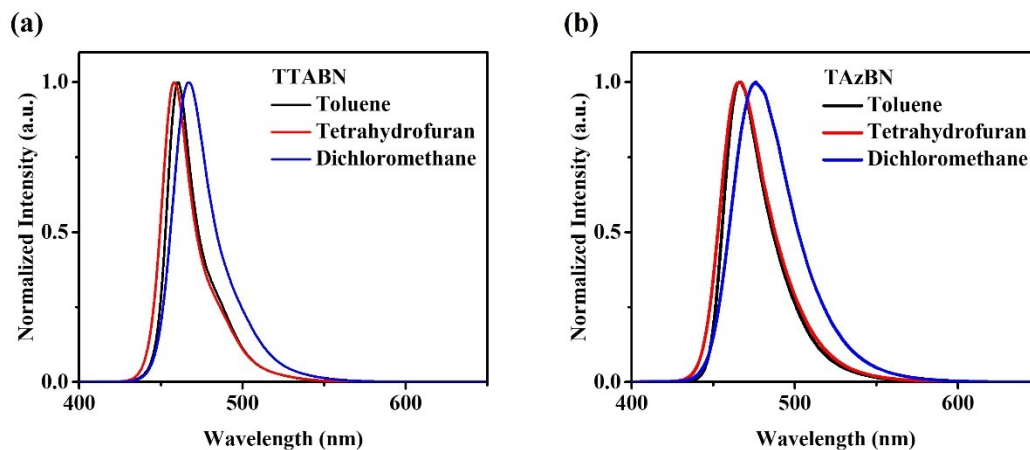

**Fig. S10** Fluorescence spectra of (a) TTABN and (b) TAzBN at 300 K measured in various solvents.

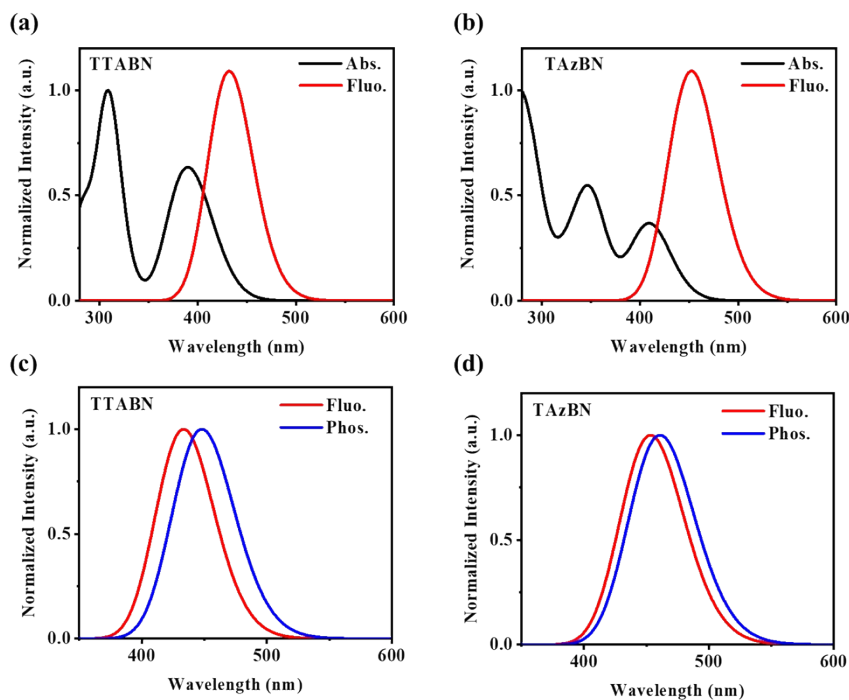

**Fig. S11** Calculated absorption and fluorescence spectra of (a) TTABN and (b) TAzBN at B3LYP/6-31G(d) in toluene. Fluorescence and phosphorescence spectra of (c) TTABN and (d) TAzBN by TD-DFT at B3LYP/6-31G(d) in the solid phase.

## 7. Transient PL measurement

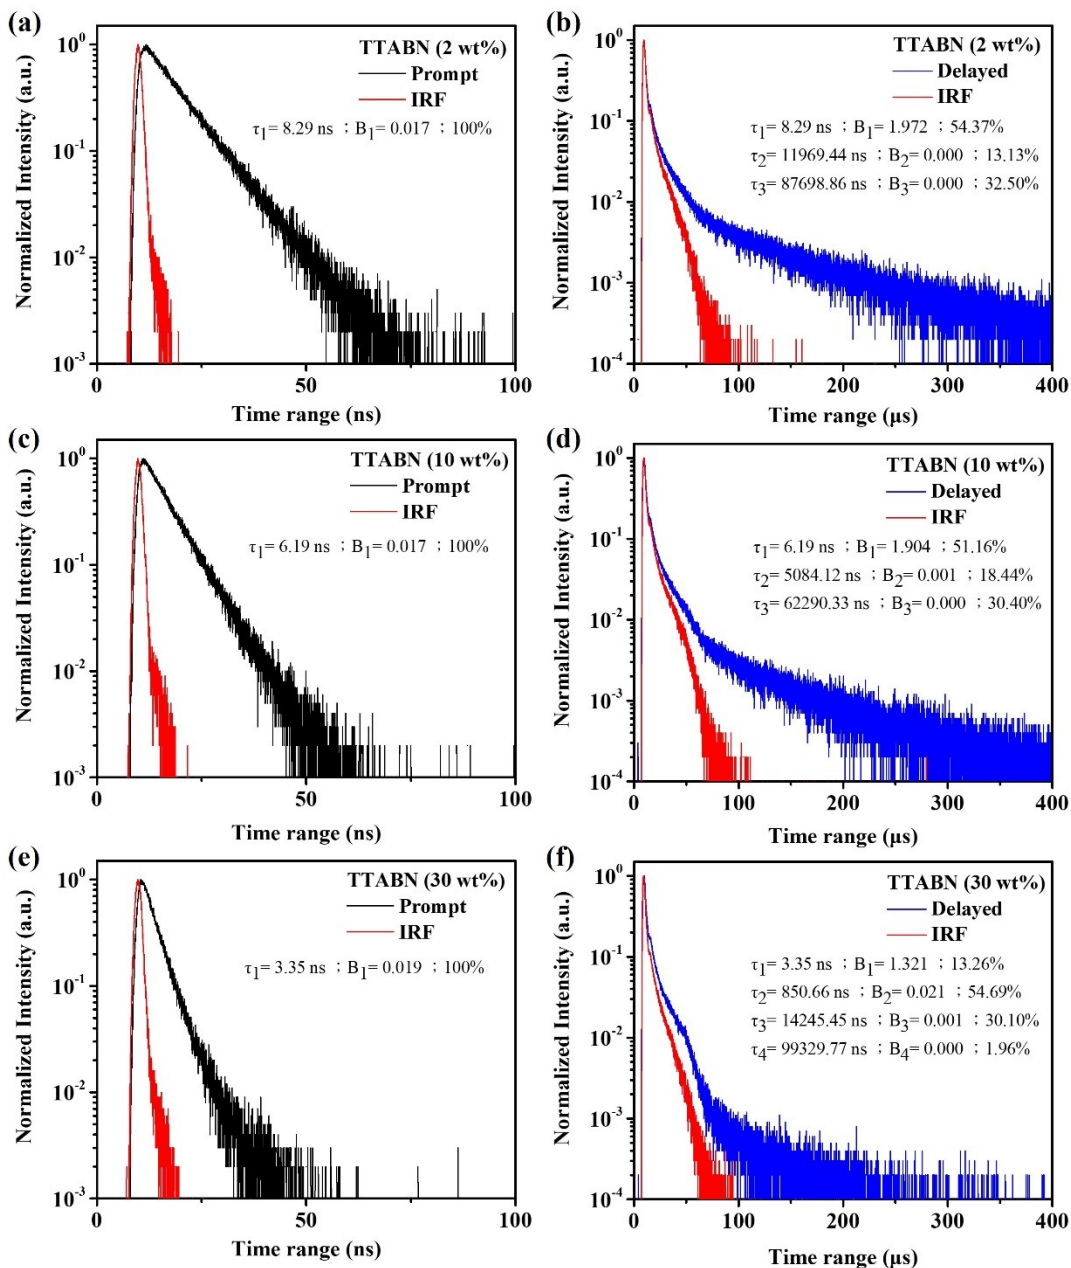

**Fig. S12** Prompt (in 100 ns) and delayed curves (in 400  $\mu\text{s}$ ) of TTABN doped in the mCPCN film of (a)(b) 2 wt%, (c)(d) 10 wt%, and (e)(f) 30 wt%, respectively. The red curves are Instrument Response Function (IRF). The excitation and detection wavelengths are 340 and 470 nm, respectively. The insets are the prompt and delayed lifetimes which were fitted by FLS980 software.



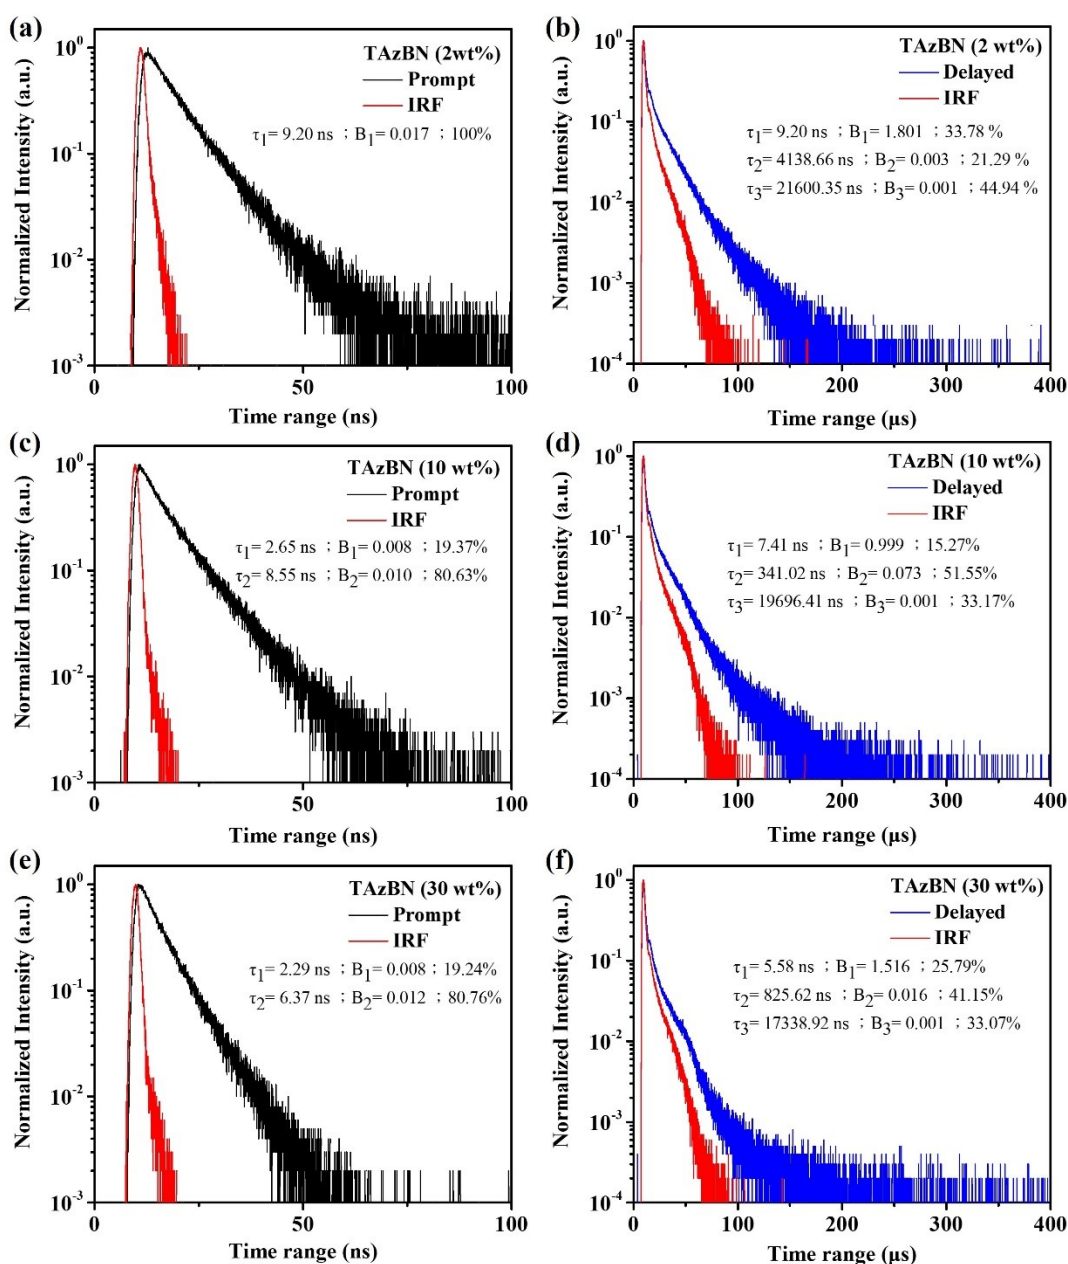

**Fig. S13** Prompt (in 100 ns) and delayed curves (in 400  $\mu\text{s}$ ) of TAZBN doped in the mCPCN film of (a)(b) 2 wt%, (c)(d) 10 wt%, and (e)(f) 30 wt%, respectively. The red curves are Instrument Response Function (IRF). The excitation and detection wavelengths are 340 and 470 nm, respectively. The insets are the prompt and delayed lifetimes which were fitted by FLS980 software.



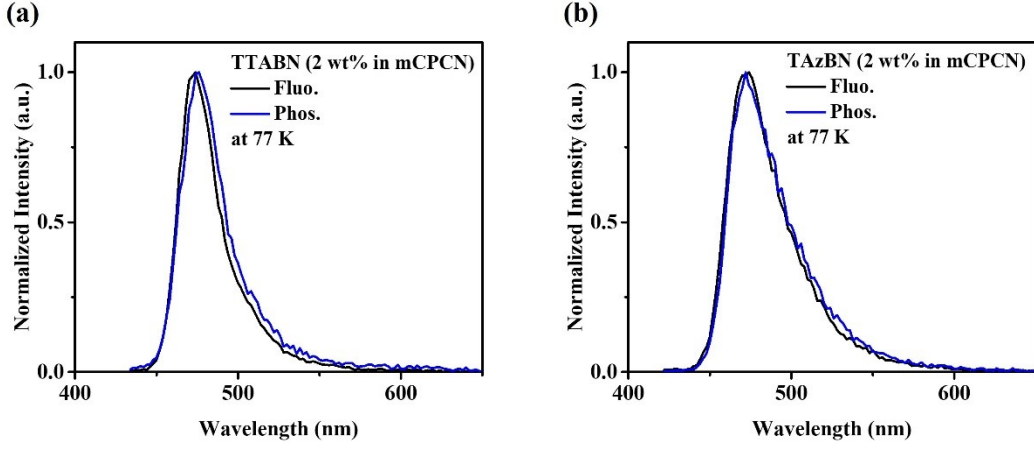

**Fig. S14** Fluorescence and phosphorescence (delayed time: 6.25 ms) spectra of (a) TTABN and (b) TAzBN doped films (2 wt% in mCPCN) measured at 77 K.

The relative rate constants could be estimated using the following equations:<sup>9</sup>

$$k_p = 1/\tau_p \quad (\text{S1})$$

$$k_d = 1/\tau_d \quad (\text{S2})$$

$$k_{r,S} = \Phi_p k_p \quad (\text{S3})$$

$$\Phi_{ISC} = \frac{k_{ISC}}{k_{r,S} + k_{nr,S} + k_{ISC}} \quad (\text{S4})$$

Assuming (i)  $k_T = k_{r,T} + k_{nr,T} \ll k_{RISC}$

$$\Phi_{RISC} = \frac{k_{RISC}}{k_{r,T} + k_{nr,T} + k_{RISC}} \approx 1 \quad (\text{S5})$$

$$k_{nr,S} = \frac{1 - \Phi_{PL}}{\Phi_{PL}} k_r \quad (\text{S6})$$

$$k_{RISC} = \frac{k_p k_d \Phi_{PL}}{k_{r,S}} \quad (\text{S7})$$

$$k_{ISC} = \frac{k_p k_d \Phi_d}{k_{RISC} \Phi_p} \quad (\text{S8})$$

Assuming (ii)  $k_{nr,S} \ll k_{r,S}, k_{ISC}$

$$\Phi_{ISC} = 1 - \Phi_p \quad (\text{S9})$$

$$k_{ISC} = k_p(1 - \Phi_p) \quad (S10)$$

$$k_{RISC} = \frac{k_p k_d \Phi_d}{k_{ISC} \Phi_p} \quad (S11)$$

$$k_T = k_{r,T} + k_{nr,T} = \frac{k_d \Phi_{PL}}{\Phi_p} - k_{RISC} \quad (S12)$$

Where  $k_{r,S}$ ,  $k_{nr,S}$ ,  $k_{ISC}$ ,  $k_{RISC}$ ,  $k_{r,T}$ , and  $k_{nr,T}$  represent the radiative decay rate of the  $S_1$  state, the nonradiative decay rate of the  $S_1$  state, intersystem crossing (ISC) rate, reverse intersystem crossing (RISC) rate, the radiative decay rate of the  $T_1$  state, the nonradiative decay rate of the  $T_1$  state. Moreover,  $k_p$  and  $k_d$  represent the decay rate constants for prompt and delayed fluorescence, respectively, which are in reciprocal relationship with the decay time constants ( $\tau_p$  and  $\tau_d$ ) experimentally determined from transient PL characteristics.  $\Phi_p$  and  $\Phi_d$  indicate prompt and delayed fluorescence components and can be distinguished from the total  $\Phi_{PL}$  by comparing the integrated intensities of prompt and delayed components in the transient PL spectra. Since the results of decay curves are multi-exponential, the intensity average lifetimes are calculated according to the equation in **Table 1** and equation S13-15. The fitting results are given by following equation:<sup>10</sup>

$$I(t) = \sum_{i=1}^n B_i e^{-t/\tau_i} \quad (S13)$$

To calculate the average prompt or delayed lifetime, we adopted the following equation:

$$\tau_p = \frac{\sum_i B_i \tau_i^2}{\sum_i B_i \tau_i} \quad (S14)$$

$$\tau_d = \frac{\sum_i B_i \tau_i^2}{\sum_i B_i \tau_i}, \text{ where } B_1 \text{ and } \tau_1 \text{ are not included} \quad (S15)$$

**Table S6** Summary of the photophysical properties of TTABN and TAzBN.

| $x^a$<br>wt% | $\tau_p^b$<br>(ns) | $\tau_d^b$<br>( $\mu$ s) | $\Phi_{PL}^c$<br>(%) | $\Phi_p^c$<br>(%) | $\Phi_d^c$<br>(%) | $k_p^d$<br>( $10^8 \text{ s}^{-1}$ ) | $k_d^d$<br>( $10^5 \text{ s}^{-1}$ ) | $k_{r,S}^c$<br>( $10^7 \text{ s}^{-1}$ ) | $k_{nr,S}^d$<br>( $10^7 \text{ s}^{-1}$ ) | $k_{ISC}^e$<br>( $10^7 \text{ s}^{-1}$ ) | $k_{RISC}^f$<br>( $10^6 \text{ s}^{-1}$ ) | $k_T^g$<br>( $10^4 \text{ s}^{-1}$ ) |
|--------------|--------------------|--------------------------|----------------------|-------------------|-------------------|--------------------------------------|--------------------------------------|------------------------------------------|-------------------------------------------|------------------------------------------|-------------------------------------------|--------------------------------------|
| TTABN        |                    |                          |                      |                   |                   |                                      |                                      |                                          |                                           |                                          |                                           |                                      |
| 2            | 8.3                | 65.5                     | 92                   | 50                | 42                | 1.20                                 | 0.15                                 | 6.02                                     | 0.52                                      | 5.50                                     | 0.03                                      | 0.24                                 |
| 10           | 6.2                | 41.1                     | 65                   | 33                | 32                | 1.61                                 | 0.24                                 | 5.32                                     | 2.87                                      | 7.94                                     | 0.05                                      | 1.27                                 |
| 30           | 3.4                | 7.8                      | 39                   | 5                 | 34                | 2.94                                 | 1.28                                 | 1.47                                     | 2.30                                      | 25.6                                     | 1.00                                      | 8.23                                 |
| TAzBN        |                    |                          |                      |                   |                   |                                      |                                      |                                          |                                           |                                          |                                           |                                      |
| 2            | 9.2                | 15.8                     | 91                   | 31                | 60                | 1.09                                 | 0.63                                 | 3.37                                     | 0.33                                      | 7.17                                     | 0.19                                      | 0.82                                 |

|    |     |     |    |    |    |      |      |      |      |      |      |      |
|----|-----|-----|----|----|----|------|------|------|------|------|------|------|
| 10 | 7.4 | 7.9 | 94 | 14 | 80 | 1.35 | 1.27 | 1.89 | 0.12 | 11.5 | 0.85 | 0.88 |
| 30 | 5.6 | 8.1 | 90 | 23 | 67 | 1.79 | 1.23 | 4.11 | 0.46 | 13.3 | 0.48 | 1.60 |

<sup>a</sup>Different concentrations of two compound doped in mCPCN films. <sup>b</sup>Lifetime of the prompt component ( $\tau_p$ ) and delayed component ( $\tau_d$ ). <sup>c</sup>Absolute PLQY ( $\Phi_{PL}$ ) measured in doped films, the prompt ( $\Phi_p$ ) and delayed ( $\Phi_d$ ) fluorescent component of PLQY. <sup>d</sup>The rate constant of prompt ( $k_p$ ) and delayed ( $k_d$ ) component according to equations (S1) and (S2). <sup>e</sup>The rate constant of the radiative singlet decay ( $k_{r,s}$ ) according to equation (S3). <sup>f</sup>The rate constant of the non-radiative singlet decay ( $k_{nr,s}$ ) according to equation (S6). <sup>g</sup>The rate constant of intersystem crossing ( $k_{ISC}$ ) according to equation (S8). <sup>h</sup>The rate constant of reverse intersystem crossing ( $k_{RISC}$ ) according to equation (S7). <sup>i</sup>The sum of the rate constants of the radiative and nonradiative decay rate from the triplet state,  $k_T = k_{r,T} + k_{nr,T}$ , according to equation (S12).

## 8. Circularly polarized properties

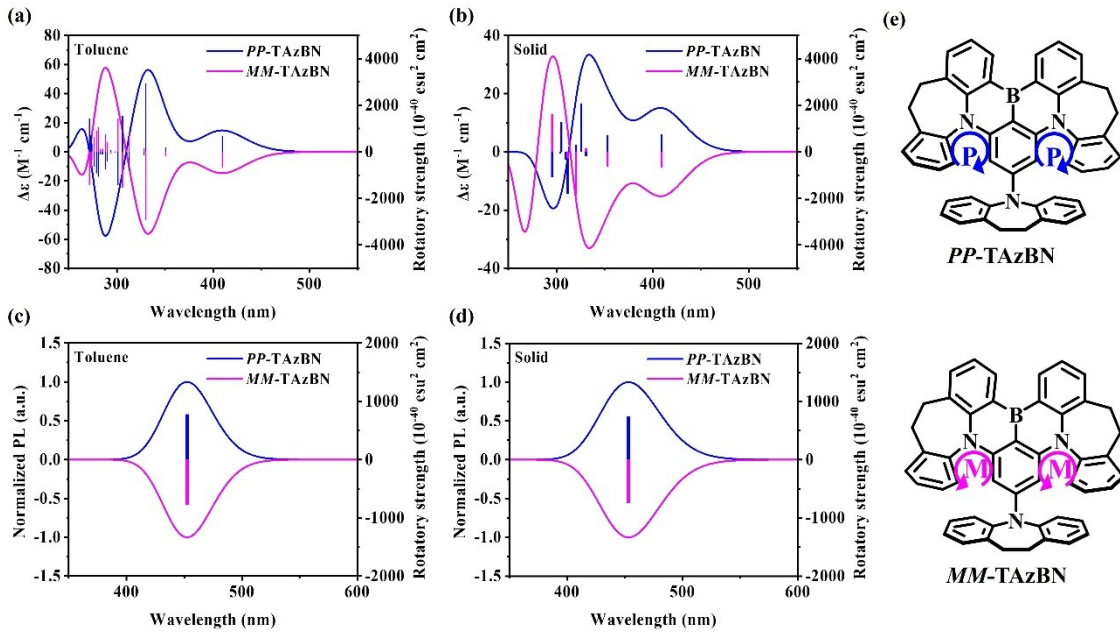

**Fig. S15** Simulated circular dichroism (CD) spectra of TAzBN in (a) toluene and (b) the solid phase. Circularly polarized luminescence (CPL) spectra of TAzBN in (c) toluene and (d) the solid phase by TD-DFT at B3LYP/6-31G(d). (e) Molecular structures of *PP*-TAzBN and *MM*-TAzBN. Rotatory strength,  $R = |\boldsymbol{\mu}||\boldsymbol{m}|\cos\theta_{\boldsymbol{\mu},\boldsymbol{m}}$ .  $\boldsymbol{\mu}$  is the transition electric dipole moment,  $\boldsymbol{m}$  is the transition magnetic dipole moment, and  $\cos\theta_{\boldsymbol{\mu},\boldsymbol{m}}$  represents the angle of  $\boldsymbol{\mu}$  and  $\boldsymbol{m}$ .

### Transition Moment Density Analysis

The transition electric dipole moment density (TEDM) of each axis component corresponding to the one electron transition from  $\varphi_i$  to  $\varphi_f$  was calculated as follows:<sup>11</sup>

$$\begin{cases} \rho_x^\mu = \varphi_i \hat{x} \varphi_f \\ \rho_y^\mu = \varphi_i \hat{y} \varphi_f \\ \rho_z^\mu = \varphi_i \hat{z} \varphi_f \end{cases} \quad (\text{S16})$$

where  $\varphi_i$  and  $\varphi_f$  are the molecular orbitals involved in the electronic transition, and  $\hat{x}$ ,  $\hat{y}$ , and  $\hat{z}$  are the position operators corresponding to each axis component. The TEDM density of the first singlet excited state ( $S_1$ ) was calculated as the sum of multiple one-electron excitations as follows,

$$\begin{cases} \rho_x^\mu(S_1) = \sum_j w_j \rho_x^\mu \\ \rho_y^\mu(S_1) = \sum_j w_j \rho_y^\mu \\ \rho_z^\mu(S_1) = \sum_j w_j \rho_z^\mu \end{cases} \quad (\text{S17})$$

where  $w_j$  is the weight of one-electron transitions for  $S_1$ . For restricted closed-shell calculations,  $w_j$

was calculated as follows,  $w_j = 2c_j^2 \frac{c_j}{|c_j|}$  where  $c_j$  is the CI coefficients printed by Gaussian after TD-DFT calculations. The total TEDM density of  $S_1$  was generated as a linear combination of each axis component as follows

$$\rho_{total}^\mu(S_1) = \frac{\mu_x}{|\mu|} \rho_x^\mu(S_1) + \frac{\mu_y}{|\mu|} \rho_y^\mu(S_1) + \frac{\mu_z}{|\mu|} \rho_z^\mu(S_1) \quad (\text{S18})$$

where  $\mu_x$ ,  $\mu_y$ , and  $\mu_z$  are each axis component of TEDM and  $|\mu|$  is the magnitude of TEDM (i.e.,  $|\mu| = \sqrt{\mu_x^2 + \mu_y^2 + \mu_z^2}$  for  $S_1$ ). In the similar manner, the averaged transition magnetic dipole moment (TMDE) densities of each axis component are expressed as follows,

$$\begin{cases} \rho_x^{m,ave} = \frac{1}{2} \left\{ \varphi_f \left( \hat{y} \frac{\partial}{\partial z} - \hat{z} \frac{\partial}{\partial y} \right) \varphi_i - \varphi_i \left( \hat{y} \frac{\partial}{\partial z} - \hat{z} \frac{\partial}{\partial y} \right) \varphi_f \right\} \\ \rho_y^{m,ave} = \frac{1}{2} \left\{ \varphi_f \left( \hat{z} \frac{\partial}{\partial x} - \hat{x} \frac{\partial}{\partial z} \right) \varphi_i - \varphi_i \left( \hat{z} \frac{\partial}{\partial x} - \hat{x} \frac{\partial}{\partial z} \right) \varphi_f \right\} \\ \rho_z^{m,ave} = \frac{1}{2} \left\{ \varphi_f \left( \hat{x} \frac{\partial}{\partial y} - \hat{y} \frac{\partial}{\partial x} \right) \varphi_i - \varphi_i \left( \hat{x} \frac{\partial}{\partial y} - \hat{y} \frac{\partial}{\partial x} \right) \varphi_f \right\} \end{cases} \quad (\text{S19})$$

The TEDM density of  $S_1$  was calculated as the sum of multiple one-electron excitations as follows,

$$\begin{cases} \rho_x^m(S_1) = \sum_j w_j \rho_x^{m,ave} \\ \rho_y^m(S_1) = \sum_j w_j \rho_y^{m,ave} \\ \rho_z^m(S_1) = \sum_j w_j \rho_z^{m,ave} \end{cases} \quad (\text{S20})$$

The total TMDM density for  $S_1$  was generated as a linear combination of each axis component as follows,

$$\rho_{total}^m(S_1) = \frac{m_x}{|m|} \rho_x^m(S_1) + \frac{m_y}{|m|} \rho_y^m(S_1) + \frac{m_z}{|m|} \rho_z^m(S_1) \quad (\text{S21})$$

where  $m_x$ ,  $m_y$ , and  $m_z$  are each axis component of TEDM and  $|m|$  is the magnitude of TEDM (i.e.,  $|m| = \sqrt{m_x^2 + m_y^2 + m_z^2}$  for  $S_1$ ).

**Table S7** Calculated Electronic Transition Properties of *PP*-TAzBN and *MM*-TAzBN.

| Molecule <sup>a</sup> | Phase   | $ \mu ^b$<br>[10 <sup>-18</sup><br>esu·cm] | $ m ^c$<br>[10 <sup>-22</sup><br>erg·G <sup>-1</sup> ] | $\cos\theta_{\mu,m}^d$ | $D^e$<br>[10 <sup>-35</sup><br>esu <sup>2</sup> ·cm <sup>2</sup> ] | $G^f$<br>[10 <sup>-40</sup><br>erg <sup>2</sup> ·G <sup>-2</sup> ] | $R^g$<br>[10 <sup>-40</sup><br>esu·cm·erg·G <sup>-1</sup> ] | $g_{abs/PL}^h$<br>[10 <sup>-3</sup> ] |
|-----------------------|---------|--------------------------------------------|--------------------------------------------------------|------------------------|--------------------------------------------------------------------|--------------------------------------------------------------------|-------------------------------------------------------------|---------------------------------------|
| <i>PP</i> -TAzBN      | Toluene | 4.57                                       | 1.13                                                   | 0.10                   | 2.09                                                               | 1.28                                                               | 53.4                                                        | 1.02                                  |
| <i>MM</i> -TAzBN      | Toluene | 4.57                                       | 1.13                                                   | -0.10                  | 2.09                                                               | 1.28                                                               | -53.4                                                       | -1.02                                 |
| <i>PP</i> -TAzBN      | Toluene | 4.19                                       | 1.10                                                   | 0.12                   | 1.76                                                               | 1.21                                                               | 57.2                                                        | 1.30                                  |
| <i>MM</i> -TAzBN      | Toluene | 4.19                                       | 1.10                                                   | -0.12                  | 1.76                                                               | 1.21                                                               | -57.2                                                       | -1.30                                 |
| <i>PP</i> -TAzBN      | Solid   | 3.75                                       | 2.19                                                   | 0.08                   | 1.41                                                               | 4.81                                                               | 66.2                                                        | 1.88                                  |
| <i>MM</i> -TAzBN      | Solid   | 3.76                                       | 2.20                                                   | -0.08                  | 1.41                                                               | 4.82                                                               | -65.2                                                       | -1.85                                 |
| <i>PP</i> -TAzBN      | Solid   | 3.35                                       | 1.95                                                   | 0.10                   | 1.12                                                               | 3.82                                                               | 63.3                                                        | 2.26                                  |
| <i>MM</i> -TAzBN      | Solid   | 3.35                                       | 1.95                                                   | -0.10                  | 1.12                                                               | 3.82                                                               | -63.3                                                       | -2.26                                 |

<sup>a</sup>Calculated for the isomers at TD-B3LYP-GD3BJ/6-3G(d) level. <sup>b</sup>Transition electric dipole moment (TEDM). <sup>c</sup>Transition magnetic dipole moment (TMDM). <sup>d</sup> $\cos\theta_{\mu,m}$  represents the angle of TEDM and TMDM. <sup>e</sup>Electric dipole strength,  $D = |\mu|^2$ . <sup>f</sup>Magnetic dipole strength,  $G = |m|^2$ . <sup>g</sup>Rotatory strength,  $R = |\mu||m|\cos\theta_{\mu,m}$ . <sup>h</sup>Dissymmetry factor calculated as follows: <sup>h</sup> $g_{abs/PL} = \frac{4|\mu||m|\cos\theta_{\mu,m}}{|\mu|^2 + |m|^2}$ . <sup>i</sup>The geometry optimized in the  $S_0$  state. <sup>j</sup>The geometry optimized in the  $S_1$  state.

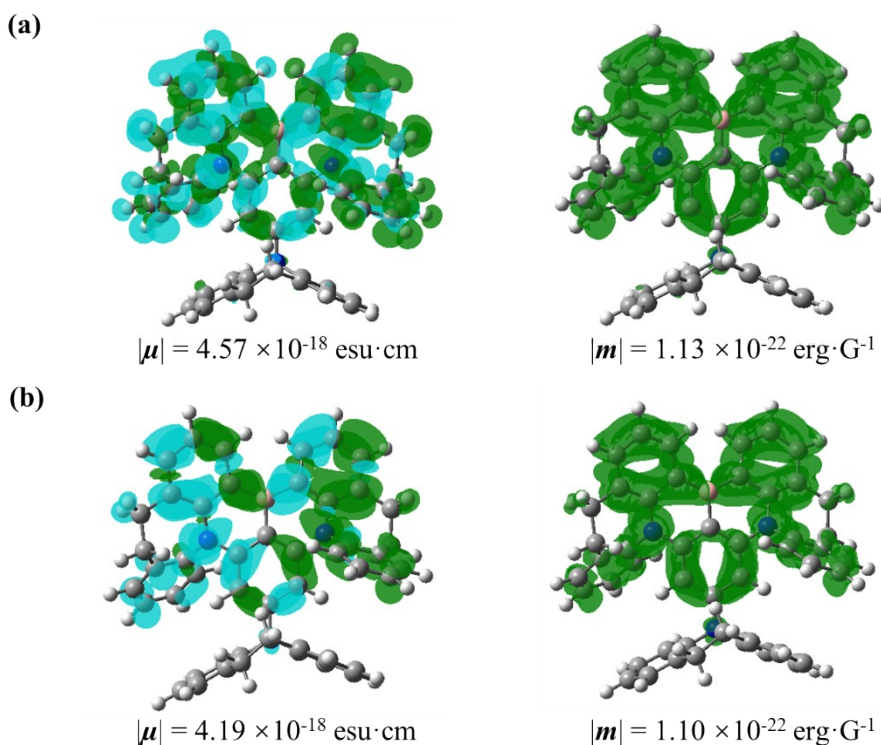

**Fig. S16** The TEDM ( $\rho_{total}^{\mu}$ ) and TMDM ( $\rho_{total}^m$ ) densities of *MM*-TAzBN for the (a)  $S_0 \rightarrow S_1$  and (b)  $S_1 \rightarrow S_0$  transition displayed with an isosurface value of 0.002 au at the TD-B3LYP-GD3BJ/6-31G(d) level of theory in toluene. The spatial integrals of the TEDM and TMDM densities correspond to the  $|\mu|$  and  $|m|$  values, respectively.

## 9. OLED device performance

**Table S8** Summary of OLED characteristics of the control devices.

| Emitter | X wt% | V <sub>on</sub> <sup>a</sup> [V] | L <sub>max</sub> <sup>b</sup> [cd/m <sup>2</sup> , V] | EQE <sub>max</sub> <sup>c</sup> [%] | EQE <sub>300/500/1000</sub> <sup>d</sup> [%] | CE <sup>e</sup> [cd/A] | PE <sup>f</sup> [lm/W] | λ <sub>max</sub> <sup>g</sup> [nm] | CIE <sup>h</sup> [x, y] | FWHM <sup>i</sup> [nm] |
|---------|-------|----------------------------------|-------------------------------------------------------|-------------------------------------|----------------------------------------------|------------------------|------------------------|------------------------------------|-------------------------|------------------------|
| TTABN   | 2     | 3.3                              | 1334, 14.0                                            | 19.2                                | 10.2/8.4/4.8                                 | 19.3                   | 16.9                   | 464                                | (0.14, 0.13)            | 31                     |
|         | 10    | 2.8                              | 1275, 12.0                                            | 10.4                                | 6.8/5.4/1.6                                  | 10.7                   | 8.4                    | 466                                | (0.15, 0.15)            | 30                     |
|         | 20    | 2.6                              | 382, 9.0                                              | 8.5                                 | 1.5/-/-                                      | 13.9                   | 10.9                   | 466                                | (0.14, 0.15)            | 30                     |
|         | 30    | 2.6                              | 451, 12.0                                             | 5.0                                 | 0.5/-/-                                      | 5.8                    | 4.9                    | 466                                | (0.14, 0.15)            | 30                     |
| TAzBN   | 2     | 3.3                              | 3648, 16.0                                            | 26.0                                | 19.0/17.2/16.2                               | 37.1                   | 31.7                   | 475                                | (0.12, 0.21)            | 45                     |
|         | 5     | 3.0                              | 3060, 10.0                                            | 26.6                                | 22.2/18.6/17.6                               | 41.2                   | 32.4                   | 478                                | (0.12, 0.24)            | 44                     |
|         | 10    | 2.9                              | 2892, 9.0                                             | 27.3                                | 25.0/21.4/16.6                               | 47.8                   | 42.9                   | 482                                | (0.13, 0.29)            | 45                     |
|         | 30    | 2.6                              | 1679, 13.0                                            | 16.3                                | 14.3/12.5/8.2                                | 33.7                   | 31.5                   | 486                                | (0.14, 0.36)            | 49                     |
|         | 50    | 2.6                              | 1128, 13.0                                            | 8.1                                 | 5.9/4.2/1.0                                  | 18.2                   | 16.3                   | 489                                | (0.16, 0.40)            | 53                     |

<sup>a</sup>The operating voltage at a brightness of 1 cd m<sup>-2</sup>. <sup>b</sup>Maximum luminance. <sup>c</sup>EQE, maximum external quantum efficiency. <sup>d</sup>EQE at brightness of 300/500/1000 cd m<sup>-2</sup>. <sup>e</sup>CE, maximum current efficiency. <sup>f</sup>PE, maximum power efficiency. <sup>g</sup>The EL emission wavelength at maximum intensity. <sup>h</sup>CIE coordinates at 8 V. <sup>i</sup>FWHM value.

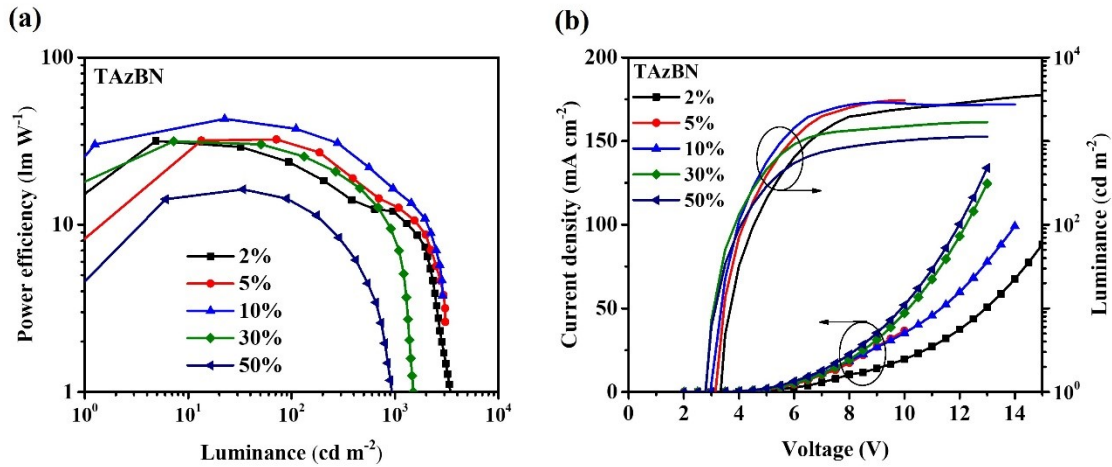

**Fig. S17** (a) PE-luminance curves, (b) current density–voltage–luminance (J–V–L) characteristics, with different dopant concentrations of 2-50%.

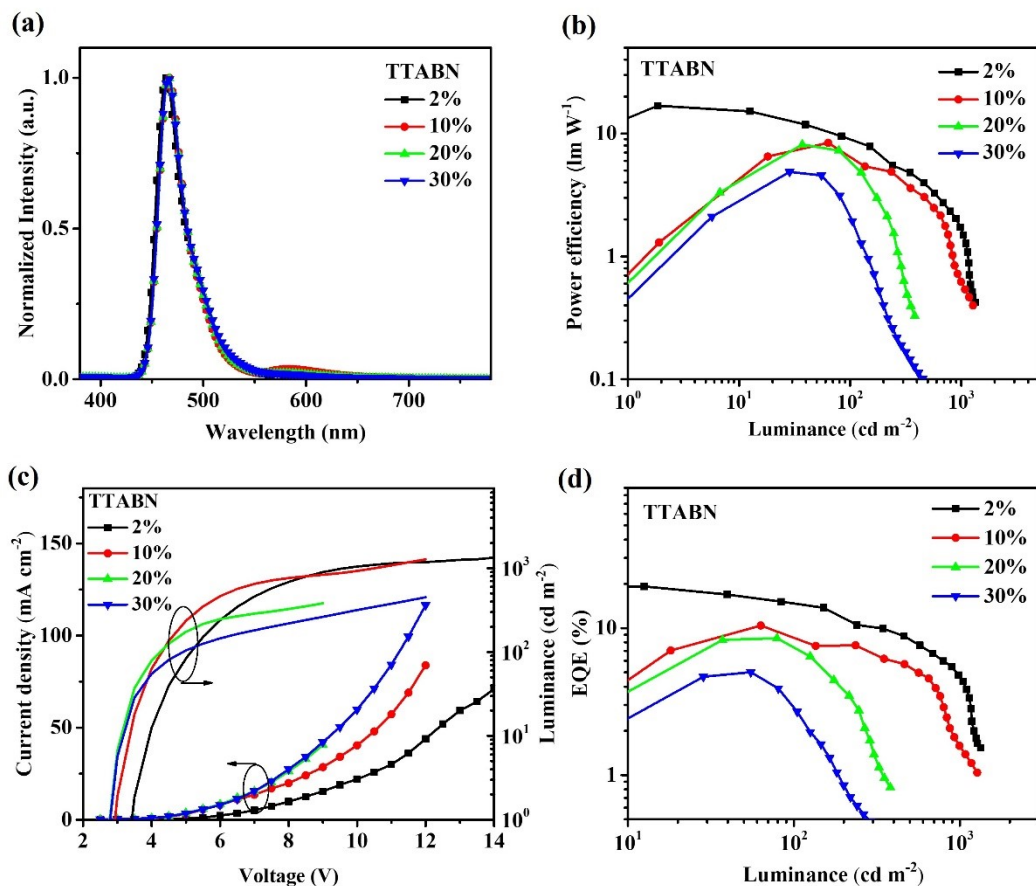

**Fig. S18** Electroluminescence characteristics of blue OLEDs. (a) Electroluminescence (EL) spectra, (b) PE-luminance curves, (c) current density–voltage–luminance (J–V–L) characteristics, and (d) EQE versus luminescence with different dopant concentrations of 2%, 10%, 20% and 30%.

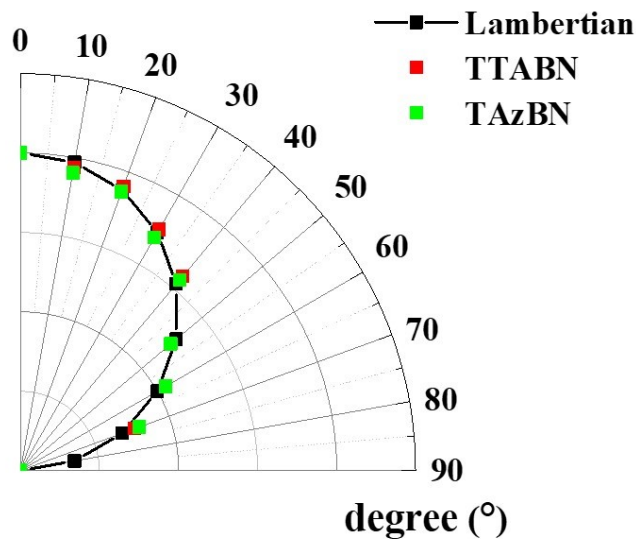

**Fig. S19** Angle-dependent EL pattern of TTABN and TAzBN-based devices (2 wt% doped in mPCPN). The black line and symbol present the luminous intensity of a Lambertian distribution.

**Table S9** Summary of MR-OLED performances without sensitizers.

| Compound    | Ref.      | Host          | $\lambda_{EL}^a$ | FWHM <sup>b</sup> | wt% <sup>c</sup> | EQE <sub>max</sub> <sup>d</sup> | EQE <sub>1000</sub> <sup>e</sup> | Roll-off <sup>f</sup> |
|-------------|-----------|---------------|------------------|-------------------|------------------|---------------------------------|----------------------------------|-----------------------|
| TAzBN       | this work | mCPCN         | 475              | 45                | 2                | 26                              | 16.2                             | 38                    |
| TAzBN       | this work | mCPCN         | 478              | 44                | 5                | 26.6                            | 17.6                             | 34                    |
| TAzBN       | this work | mCPCN         | 482              | 45                | 10               | 27.3                            | 16.6                             | 39                    |
| TAzBN       | this work | mCPCN         | 486              | 49                | 30               | 16.3                            | 8.2                              | 50                    |
| TAzBN       | this work | mCPCN         | 489              | 53                | 50               | 8.1                             | 1.0                              | 88                    |
| BBCZ-DB     | 12        | mCBP          | 469              | 27                | 1                | 29.3                            | -                                | -                     |
| BBCZ-SB     | 12        | mCBP          | 487              | 26                | 1                | 27.8                            | -                                | -                     |
| BBCz-R      | 12        | mCBP          | 515              | 54                | 1                | 31.8                            | -                                | -                     |
| BBCz-G      | 12        | mCBP          | 549              | 48                | 1                | 29.3                            | -                                | -                     |
| BBCz-Y      | 12        | mCBP          | 616              | 26                | 1                | 22                              | -                                | -                     |
| BN1         | 13        | mCB           | 506              | 36                | 1                | 24.3                            | 12.9                             | 47                    |
| BN2         | 13        | mCB           | 545              | 46                | 1                | 24.5                            | 7.6                              | 69                    |
| BN3         | 13        | mCB           | 548              | 43                | 1                | 24.7                            | 8.9                              | 64                    |
| D-SBON      | 14        | mCBP          | 466              | 28                | 4                | 13.7                            | 6.7                              | 51                    |
| D-SBSN      | 14        | mCBP          | 492              | 31                | 4                | 17.6                            | 12.0                             | 32                    |
| D-DBON      | 14        | mCBP          | 510              | 29                | 4                | 26.7                            | 12.0                             | 55                    |
| D-DBSN      | 14        | mCBP          | 556              | 43                | 4                | 21.8                            | 16.9                             | 22                    |
| BNO1        | 15        | DMIC-TRZ      | 609              | 37                | 1                | 14.9                            | 3.3                              | 78                    |
| BNO2        | 15        | DMIC-TRZ      | 629              | 39                | 1                | 12                              | 4.4                              | 63                    |
| BNO3        | 15        | DMIC-TRZ      | 616              | 38                | 1                | 15.1                            | 4.3                              | 72                    |
| RBNO1       | 16        | DMIC-TRZ      | 632              | 53                | 1                | 17.2                            | 3.0                              | 83                    |
| RBNO2       | 16        | DMIC-TRZ      | 645              | 49                | 1                | 15.1                            | 3.4                              | 77                    |
| PTZBNO      | 17        | DMIC-TRZ      | 617              | 59                | 1                | 13.6                            | 6.3                              | 54                    |
| PXZBNO      | 17        | DMIC-TRZ      | 630              | 53                | 1                | 11.8                            | 3.9                              | 67                    |
| CNCz-BNCz   | 18        | CBP           | 584              | 49                | 1                | 23                              | 10.8                             | 53                    |
| TCZ-F-DABNA | 19        | PhCzBCz       | 568              | 55                | 1                | 31.6                            | 15.4                             | 51                    |
| TCZ-F-DABNA | 19        | PhCzBCz       | 576              | 57                | 2                | 32.6                            | 12.7                             | 61                    |
| TCZ-F-DABNA | 19        | PhCzBCz       | 580              | 61                | 4                | 34.1                            | 10.2                             | 70                    |
| TCZ-F-DABNA | 19        | PhCzBCz       | 584              | 61                | 6                | 37.9                            | 7.5                              | 80                    |
| TCZ-F-DABNA | 19        | PhCzBCz       | 588              | 61                | 8                | 39.2                            | 7.8                              | 80                    |
| TCZ-F-DABNA | 19        | PhCzBCz       | 592              | 61                | 10               | 37.1                            | 9.7                              | 74                    |
| TCZ-F-DABNA | 19        | PhCzBCz       | 592              | 61                | 20               | 35.5                            | 11.8                             | 67                    |
| TCZ-F-DABNA | 19        | PhCzBCz       | 592              | 62                | 30               | 30.6                            | 11.0                             | 64                    |
| TCZ-F-DABNA | 19        | PhCzBCz       | 592              | 62                | 40               | 22.6                            | 9.2                              | 59                    |
| BN-R        | 20        | NPB/DMFBD-TRZ | 617              | 47                | 1                | 22                              | 15.4                             | 30                    |
| BN-R        | 20        | NPB/DMFBD-TRZ | 620              | 46                | 3                | 17.8                            | 4.9                              | 72                    |
| BN-R        | 20        | NPB/DMFBD-TRZ | 627              | 48                | 10               | 17.5                            | 2.2                              | 87                    |
| BN-R        | 20        | NPB/DMFBD-TRZ | 629              | 49                | 20               | 16.2                            | 1.8                              | 89                    |



|                 |    |               |     |    |     |      |      |    |
|-----------------|----|---------------|-----|----|-----|------|------|----|
| BN-R            | 20 | NPB/DMFBD-TRZ | 630 | 50 | 30  | 13.6 | 1.6  | 88 |
| BN-R            | 20 | NPB/DMFBD-TRZ | 631 | 50 | 40  | 13.6 | 10.4 | 1  |
| BNIP-tBuCz      | 21 | DMIC-TRZ      | 566 | 69 | 1   | 32.2 | 29.6 | 8  |
| BNIP-tBuDPAC    | 21 | DMIC-TRZ      | 544 | 58 | 1   | 39.4 | 23.3 | 41 |
| BNIP-CzDPA      | 21 | DMIC-TRZ      | 584 | 64 | 1   | 32.4 | 15.2 | 53 |
| BNDIP           | 21 | DMIC-TRZ      | 582 | 62 | 1   | 34.1 | 25.5 | 25 |
| B4N6-Me         | 22 | DMIC-TRZ      | 588 | 27 | 1   | 30.4 | 6.2  | 80 |
| VTCzBN          | 23 | 2,6-DCzppy    | 499 | 38 | 4   | 31.7 | 19.8 | 38 |
| TCz-VTCzBN      | 23 | 2,6-DCzppy    | 524 | 37 | 4   | 32.2 | 16.0 | 50 |
| tCzPhB-FL       | 24 | CBP           | 535 | 26 | 2   | 26.2 | -    | -  |
| tCzPhB-Ph       | 24 | CBP           | 527 | 24 | 2   | 29.3 | -    | -  |
| AZA-BN          | 25 | mCBP          | 528 | 31 | 2   | 19.8 | 10.8 | 45 |
| AZA-BN          | 25 | mCBP          | 528 | 31 | 4   | 25.7 | 9.0  | 65 |
| AZA-BN          | 25 | mCBP          | 529 | 33 | 6   | 20.6 | 6.7  | 67 |
| AZA-BN          | 25 | mCBP          | 531 | 35 | 8   | 16.8 | 4.4  | 74 |
| BN-STO          | 26 | DMIC-TRZ      | 517 | 34 | 1   | 40.1 | 28.1 | 30 |
| BN-XTO          | 26 | DMIC-TRZ      | 513 | 34 | 1   | 37.3 | 18.6 | 50 |
| BN-TP-N1        | 27 | PhCzBCz       | 532 | 34 | 3   | 34.9 | 13.9 | 60 |
| BN-TP-N2        | 27 | PhCzBCz       | 534 | 35 | 3   | 31.3 | 22.3 | 29 |
| BN-TP-N3        | 27 | PhCzBCz       | 524 | 34 | 3   | 37.3 | 19.8 | 47 |
| BN-TP-N4        | 27 | PhCzBCz       | 528 | 36 | 3   | 36.5 | 21.2 | 42 |
| DBTN-2          | 28 | SF3-TRZ       | 520 | 29 | 2.5 | 35.2 | 20.4 | 42 |
| $\omega$ -DABNA | 29 | DOBNA-Ph      | 512 | 25 | 0.5 | 31.1 | 29.4 | 5  |
| t-DAB-DPA       | 30 | mCBP:mCBP-CN  | 559 | 26 | 3   | 27.6 | 9.2  | 67 |
| t-DAB-DPA       | 30 | mCBP:mCBP-CN  | 559 | 26 | 5   | 27.9 | 8.1  | 71 |
| t-DAB-DPA       | 30 | mCBP:mCBP-CN  | 559 | 26 | 7   | 27.4 | 7.6  | 72 |
| t-DAB-DPA       | 30 | mCBP:mCBP-CN  | 560 | 26 | 10  | 25.9 | 7.6  | 71 |
| t-DABNA         | 30 | mCBP:mCBP-CN  | 564 | 26 | 3   | 28.4 | 4.4  | 85 |
| t-DABNA         | 30 | mCBP:mCBP-CN  | 564 | 26 | 5   | 23.9 | 3.4  | 86 |
| t-DABNA         | 30 | mCBP:mCBP-CN  | 564 | 26 | 7   | 24.8 | 3.2  | 87 |
| t-DABNA         | 30 | mCBP:mCBP-CN  | 565 | 26 | 10  | 21.3 | 2.7  | 87 |
| mICz-DABNA      | 31 | mCBP-CN       | 466 | 26 | 3   | 26.4 | -    | -  |
| BFCz-DABNA      | 31 | mCBP-CN       | 463 | 26 | 3   | 28   | -    | -  |
| pBP-DABNA-Me    | 32 | mCBP:DPEPO    | 464 | 23 | 5   | 23.4 | -    | -  |
| pBP-DABNA-Me    | 32 | mCBP:DPEPO    | 464 | 23 | 10  | 22.4 | -    | -  |
| pBP-DABNA-Me    | 32 | mCBP:DPEPO    | 464 | 23 | 20  | 22.1 | -    | -  |
| pBP-DABNA-Me    | 32 | mCBP:DPEPO    | 464 | 23 | 100 | 20.6 | -    | -  |
| V-DABNA-Mes     | 33 | polymer C     | 480 | 27 | 1   | 22.9 | 10.9 | 52 |
| v-DABNA         | 34 | mCBP          | 472 | 17 | 3   | 24.6 | 14.9 | 39 |
| BOBO-Z          | 34 | mCBP          | 445 | 18 | 3   | 13.6 | 3.3  | 76 |
| BOBS-Z          | 34 | mCBP          | 456 | 23 | 3   | 26.9 | 15.0 | 44 |

|           |    |          |     |    |    |      |      |    |
|-----------|----|----------|-----|----|----|------|------|----|
| BSBS-Z    | 34 | mCBP     | 463 | 22 | 3  | 26.8 | 15.9 | 41 |
| DTBA-BN2  | 35 | 26DCzPPy | 495 | 47 | 1  | 26.4 | 22.0 | 17 |
| DTBA-BN2  | 35 | 26DCzPPy | 497 | 47 | 3  | 31.2 | 25.6 | 18 |
| DTBA-BN2  | 35 | 26DCzPPy | 499 | 47 | 5  | 27.9 | 25.1 | 10 |
| DTBA-BN2  | 35 | 26DCzPPy | 502 | 47 | 10 | 23.4 | 20.4 | 13 |
| DTBA-BN2  | 35 | 26DCzPPy | 506 | 48 | 20 | 21.5 | 18.6 | 13 |
| DTBA-B2N3 | 35 | 26DCzPPy | 475 | 28 | 3  | 30.9 | 20.5 | 34 |

<sup>a</sup>EL Emission peak. <sup>b</sup>Full-width at half-maximum of EL. <sup>c</sup>Dopant concentration. <sup>d</sup>Maximum external quantum efficiency. <sup>e</sup>External quantum efficiency at 1000 cd m<sup>-2</sup>. <sup>f</sup>Efficiency roll-off at 1000 cd m<sup>-2</sup>.

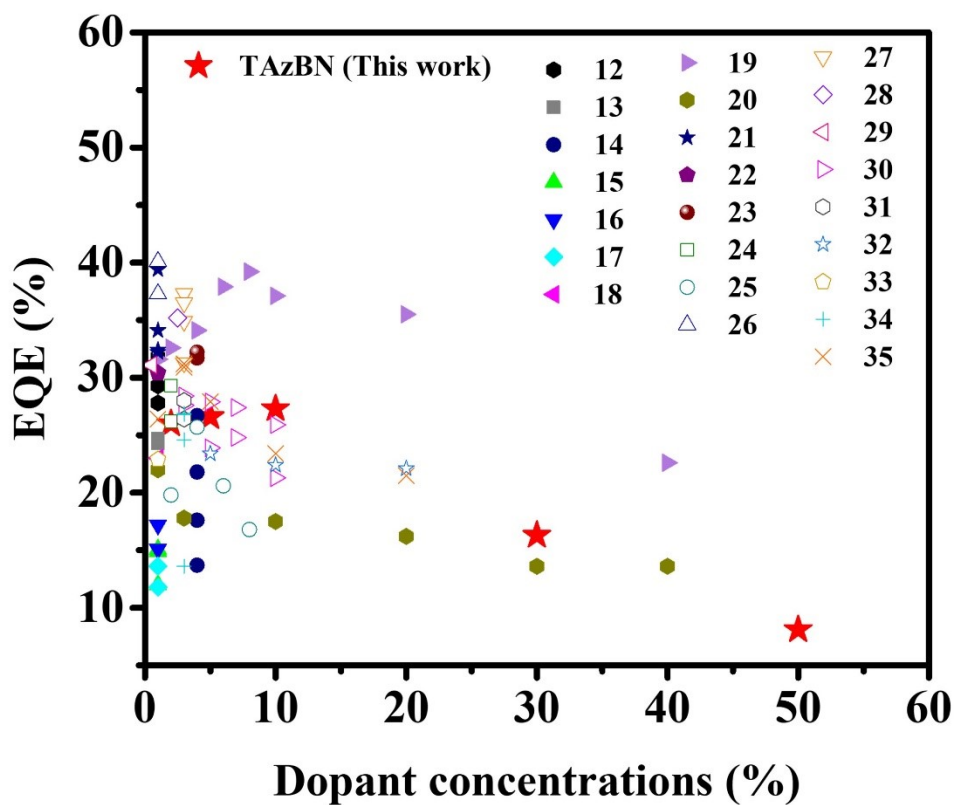

**Fig. S20** Summary the maximum external quantum efficiency of MR emitters at different dopant concentrations.

## 10. NMR spectra

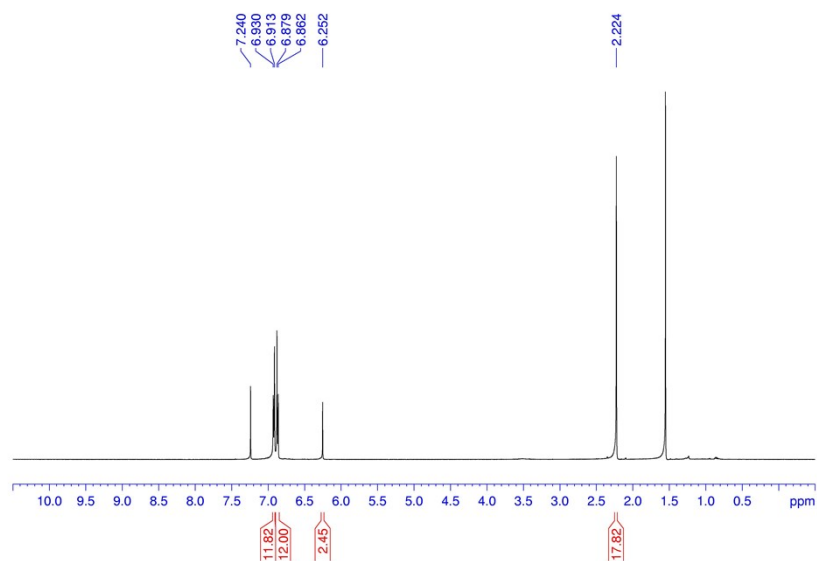

**Fig. S21**  $^1\text{H}$  NMR of  $N^1, N^1, N^3, N^3, N^5, N^5$ -hexa-*p*-tolylbenzene-1,3,5-triamine.

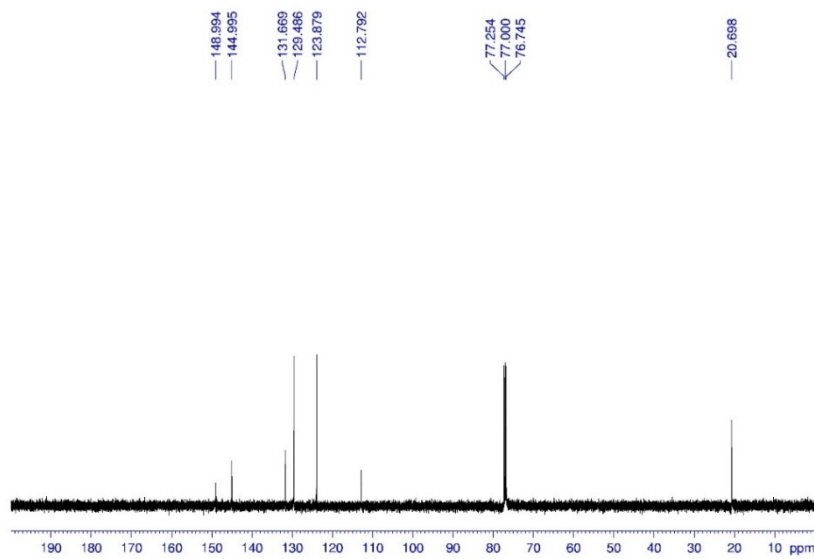

**Fig. S22**  $^{13}\text{C}$  NMR of  $N^1, N^1, N^3, N^3, N^5, N^5$ -hexa-*p*-tolylbenzene-1,3,5-triamine.

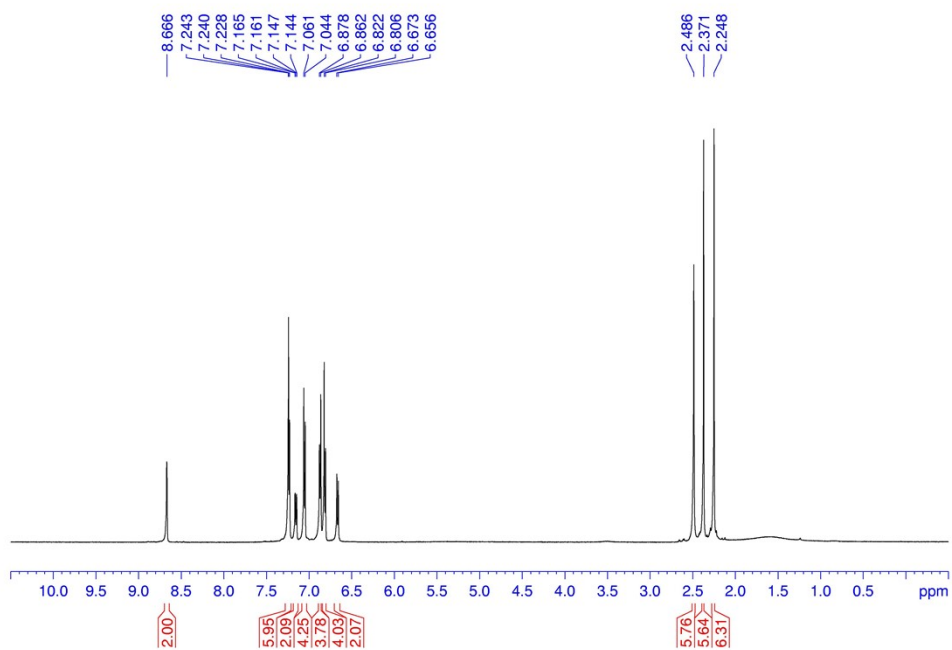

Fig. S23  $^1\text{H}$  NMR of TTABN.

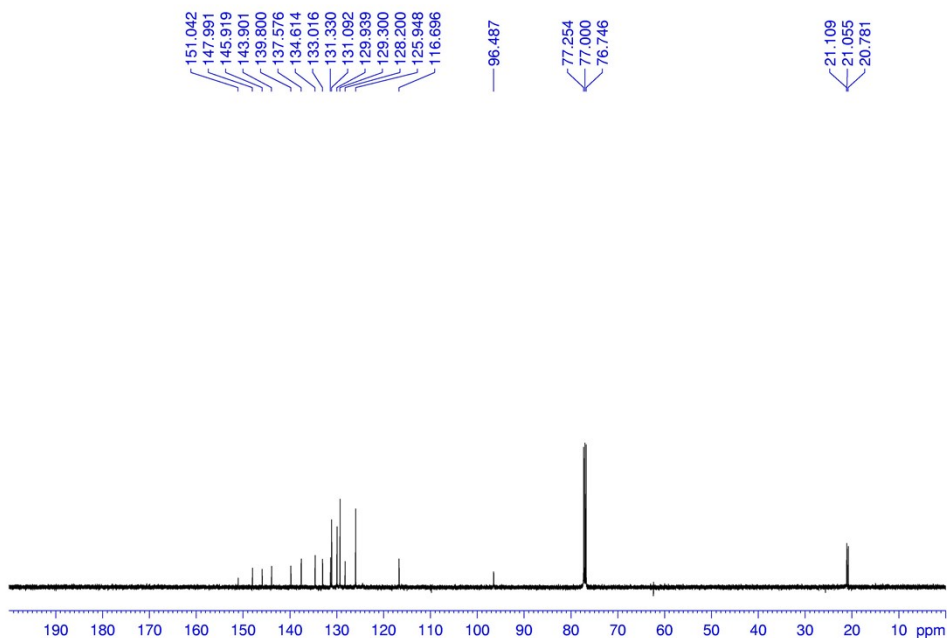

Fig. S24  $^{13}\text{C}$  NMR of TTABN.

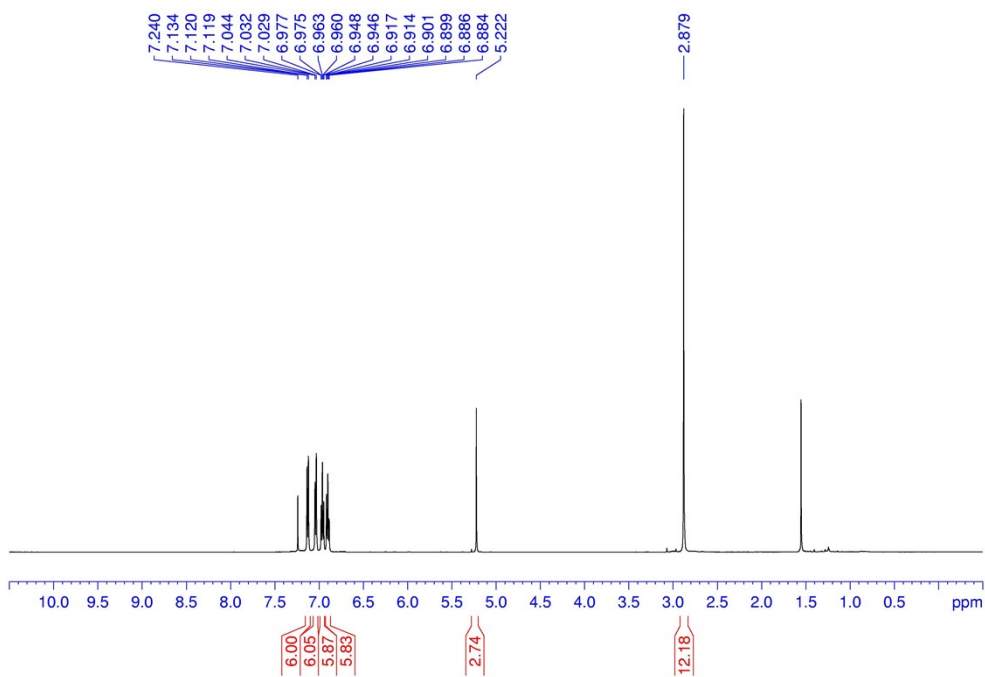

Fig. S25  $^1\text{H}$  NMR of 1,3,5-tris(10,11-dihydro-5*H*-dibenzo[*b,f*]azepin-5-yl)benzene

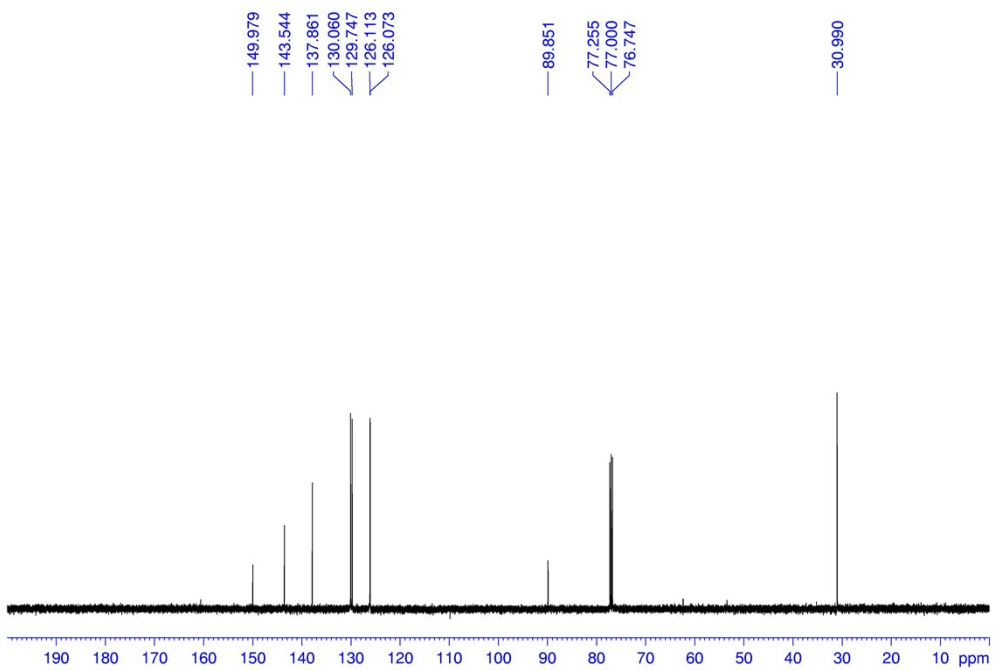

Fig. S26  $^{13}\text{C}$  NMR of 1,3,5-tris(10,11-dihydro-5*H*-dibenzo[*b,f*]azepin-5-yl)benzene

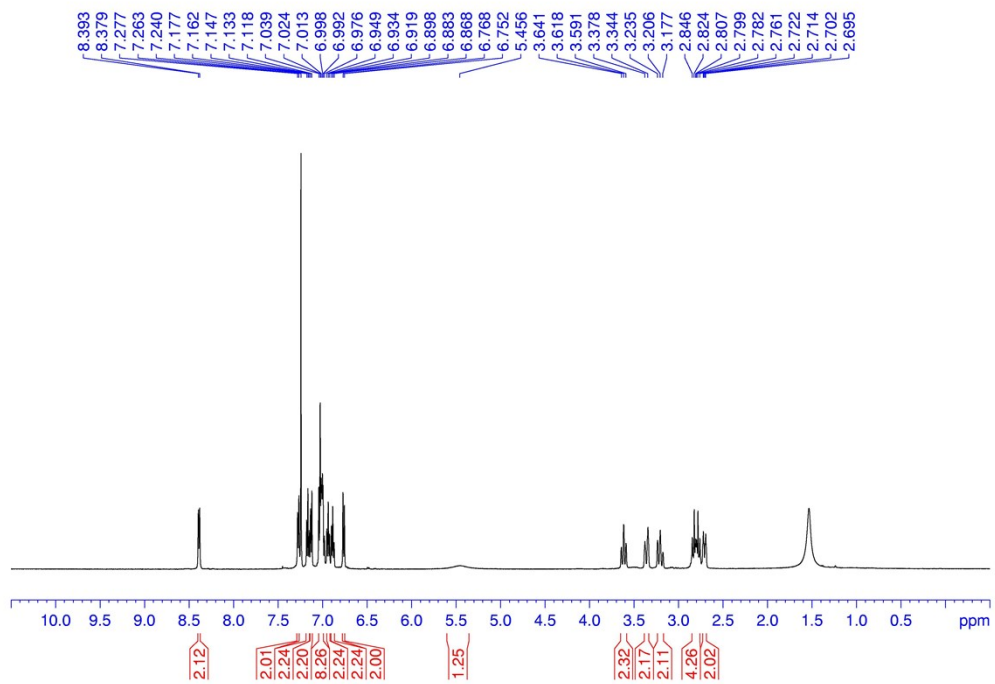

Fig. S27  $^1\text{H}$  NMR of TAzBN.

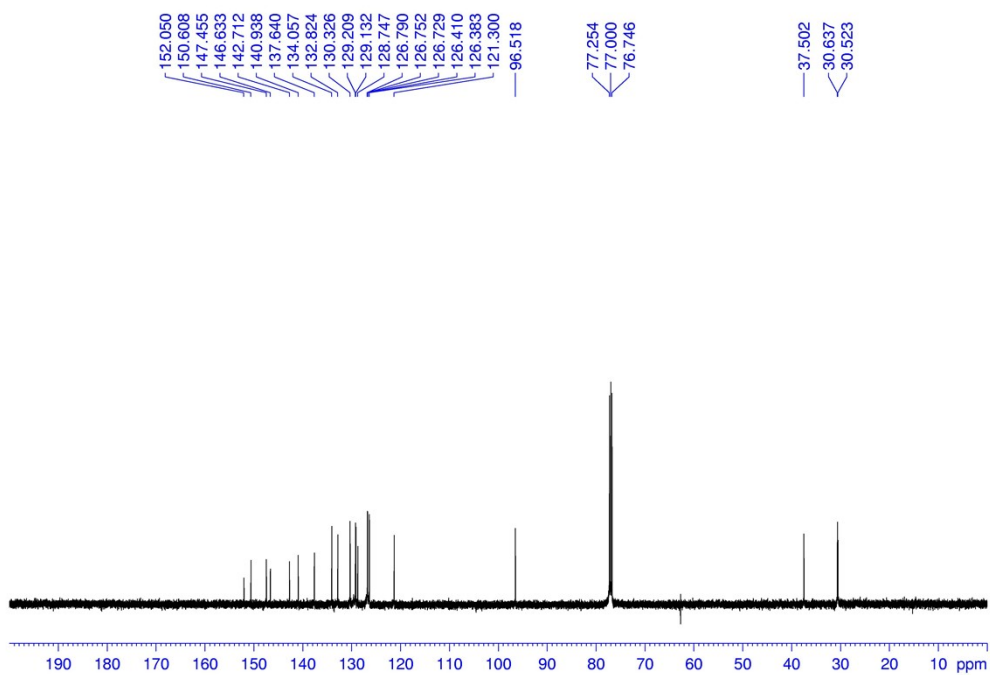

Fig. S28  $^{13}\text{C}$  NMR of TAzBN.

TTABN\_11B

37.04

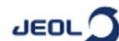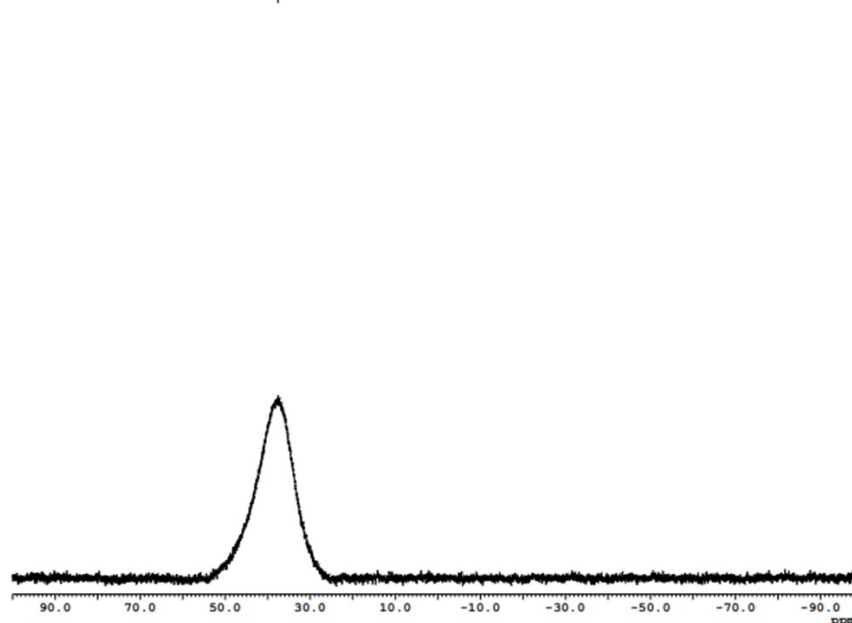

```

File Name      = TTABN_11B-1-4
Sample ID      = sptab11b
Experiment     = CPMASPTABN-0
Actual_Start_Time = 18-FEB-2004 21
Actual_Stop_Time  = 18-FEB-2004 11

Comment       = TTABN_11B
Data_Format   = 1D FID
Dir_Path      = 20214
F2_Channel    = Recoupled
F2_Offset     = Recoupled
F2_Pulse_Prog = [pmc]
F2_Pulse_Width = 0
F2_Sensitivity = 986-825309/51
ExperimentDate = 18-FEB-2004

Field_Strength = 11.747378[T]
F2_Acq_Duration = 0.24973496[s]
F2_Channel     = Recoupled
F2_Offset     = 140.47132662[M]
F2_Pulse_Prog = [pmc]
F2_Pulse_Width = 12500
F2_Sensitivity = 10000
F2_Sensitivity = 4.0539942[Mu]
F2_Temp       = 0
F2_Temp_Clipped = 10.20088201[M]
F2_Temp_Input = 41.14046371[M]
F2_Temp_Prog  = 200[pmc]
F2_Tuning     = Recoupled
F2_Volts      = 100.15991821[M]
F2_Offset     = 0.0[pmc]
Masking       = 0.0[pmc]
Clipped       = 10000
Stack         = 10000
Total_Scans   = 10000

Relaxation_Delay = 1[s]
Rezero_Gain     = 16
Temp_Set       = 12.1[pmc]
X_H1_Mask      = 14.42[pmc]
X_Acq_Time     = 0.24973496[s]
X_Angle        = 90[deg]
X_Ant           = 0.0[pmc]
X_Coupling     = 32748
X_Data_Points  = 32748
X_Peak_Default = 15.01[pmc]
X_Pulse        = 14.42[pmc]
X_Rf_Amp_Prog = 10.01[pmc]
X_Rf_Amp_Calc = 10.01[pmc]
X_Rf_Amp_Max   = 10.01[pmc]
X_Rf_Amp_Min   = 11.97024897[Mu]
X_Rf_Amp_Type  = 11.9504897[Mu]
X_Coupling_Prog = 0[pmc]
X_Coupling_Calc = 100.15991821[M]
X_Coupling_Max = 10000
X_Coupling_Min = 10000
X_Offset       = 986025
X_Offset_Default = 0[pmc]
X_Offset_Prog  = 0[pmc]
X_Offset_Calc = 0[pmc]
X_Offset_Max   = 0[pmc]
X_Offset_Min   = 0
X_Peak         = 0
Default_X_Sensitivity = 0[pmc]
Experiment_Path = C:\Program File
Initial_Scan   = 1[pmc]
In_1d_1st_Sp   = 0[pmc]
Max_Time       = 1[pmc]
Max_Time_Flag  = 0[pmc]
Mf_Sat_Temp    = 4.7004334[pmc]
Relaxation_Delay_Calc = 0[pmc]
Relaxation_Delay_Default = 4.7004334[pmc]
Rezero_Gain_Prog = 16[pmc]
Rezero_Gain_Calc = 0.24973496[s]
Rpt_Num        = 1[pmc]
Typ_1st_Sp     = 0.15763884[pmc]
Typ_1st_Sp_Prog = end
  
```

Fig. S29 <sup>11</sup>B spectra of TTABN.

TAZBN\_11B

40.889

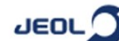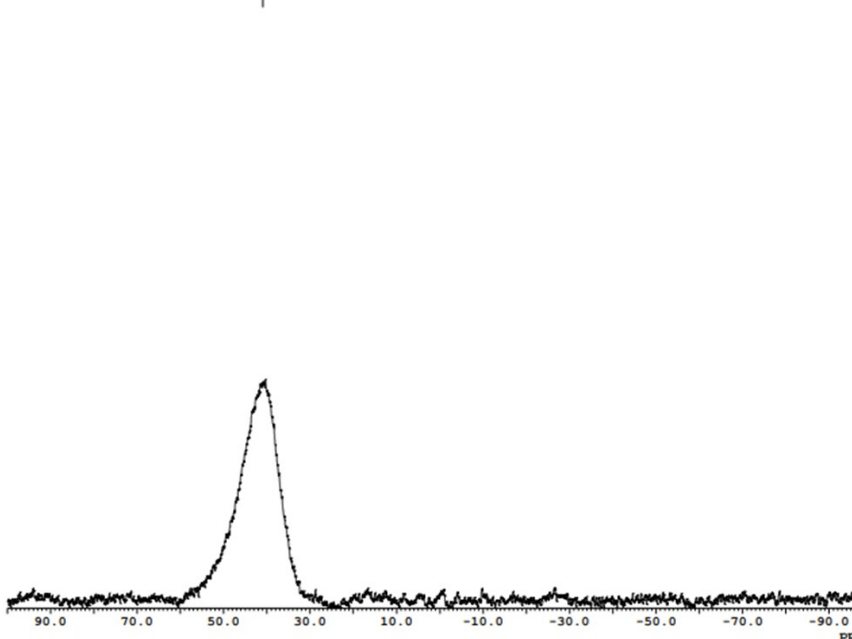

```

File Name      = TTABN_11B-1-4
Sample ID      = sptab11b
Experiment     = CPMASPTABN-0
Actual_Start_Time = 18-FEB-2004 22
Actual_Stop_Time  = 18-FEB-2004 11

Comment       = TTABN_11B
Data_Format   = 1D FID
Dir_Path      = 20214
F2_Channel    = Recoupled
F2_Offset     = Recoupled
F2_Pulse_Prog = [pmc]
F2_Pulse_Width = 0
F2_Sensitivity = 986-825309/51
ExperimentDate = 18-FEB-2004

Field_Strength = 11.747378[T]
F2_Acq_Duration = 0.24973496[s]
F2_Channel     = Recoupled
F2_Offset     = 140.47132662[M]
F2_Pulse_Prog = [pmc]
F2_Pulse_Width = 12500
F2_Sensitivity = 10000
F2_Sensitivity = 4.0539942[Mu]
F2_Temp       = 0
F2_Temp_Clipped = 10.20088201[M]
F2_Temp_Input = 41.14046371[M]
F2_Temp_Prog  = 200[pmc]
F2_Tuning     = Recoupled
F2_Volts      = 100.15991821[M]
F2_Offset     = 0.0[pmc]
Masking       = 0.0[pmc]
Clipped       = 10000
Stack         = 10000
Total_Scans   = 10000

Relaxation_Delay = 1[s]
Rezero_Gain     = 16
Temp_Set       = 12.1[pmc]
X_H1_Mask      = 14.42[pmc]
X_Acq_Time     = 0.24973496[s]
X_Angle        = 90[deg]
X_Ant           = 0.0[pmc]
X_Coupling     = 32748
X_Data_Points  = 32748
X_Peak_Default = 15.01[pmc]
X_Pulse        = 14.42[pmc]
X_Rf_Amp_Prog = 10.01[pmc]
X_Rf_Amp_Calc = 10.01[pmc]
X_Rf_Amp_Max   = 10.01[pmc]
X_Rf_Amp_Min   = 11.97024897[Mu]
X_Rf_Amp_Type  = 11.9504897[Mu]
X_Coupling_Prog = 0[pmc]
X_Coupling_Calc = 100.15991821[M]
X_Coupling_Max = 10000
X_Coupling_Min = 10000
X_Offset       = 986025
X_Offset_Default = 0[pmc]
X_Offset_Prog  = 0[pmc]
X_Offset_Calc = 0[pmc]
X_Offset_Max   = 0[pmc]
X_Offset_Min   = 0
X_Peak         = 0
Default_X_Sensitivity = 0[pmc]
Experiment_Path = C:\Program File
Initial_Scan   = 1[pmc]
In_1d_1st_Sp   = 0[pmc]
Max_Time       = 1[pmc]
Max_Time_Flag  = 0[pmc]
Mf_Sat_Temp    = 4.7004334[pmc]
Relaxation_Delay_Calc = 0[pmc]
Relaxation_Delay_Default = 4.7004334[pmc]
Rezero_Gain_Prog = 16[pmc]
Rezero_Gain_Calc = 0.24973496[s]
Rpt_Num        = 1[pmc]
Typ_1st_Sp     = 0.15763884[pmc]
Typ_1st_Sp_Prog = end
  
```

Fig. S30 <sup>11</sup>B spectra of TAZBN.

## 11. HPLC data

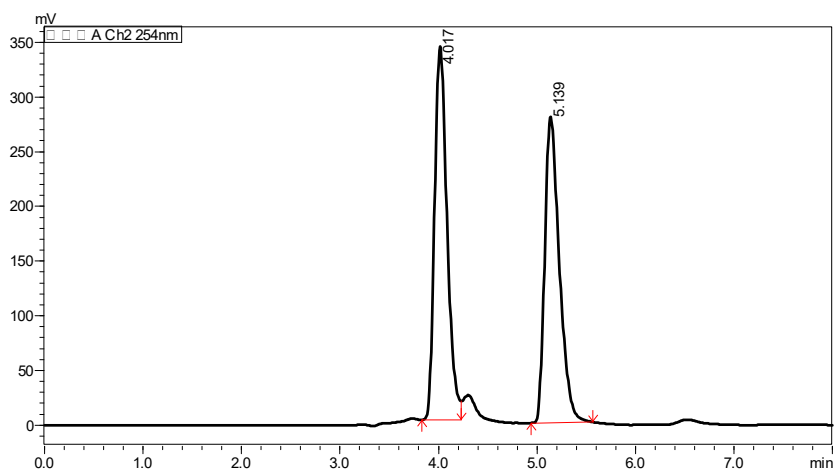

**Fig. S31** HPLC profile of TazBN eluted by Hexane/DCM (V/V = 50/50) using Daicel Chiralpak IE column. The flow rate is 1.0 ml/min.

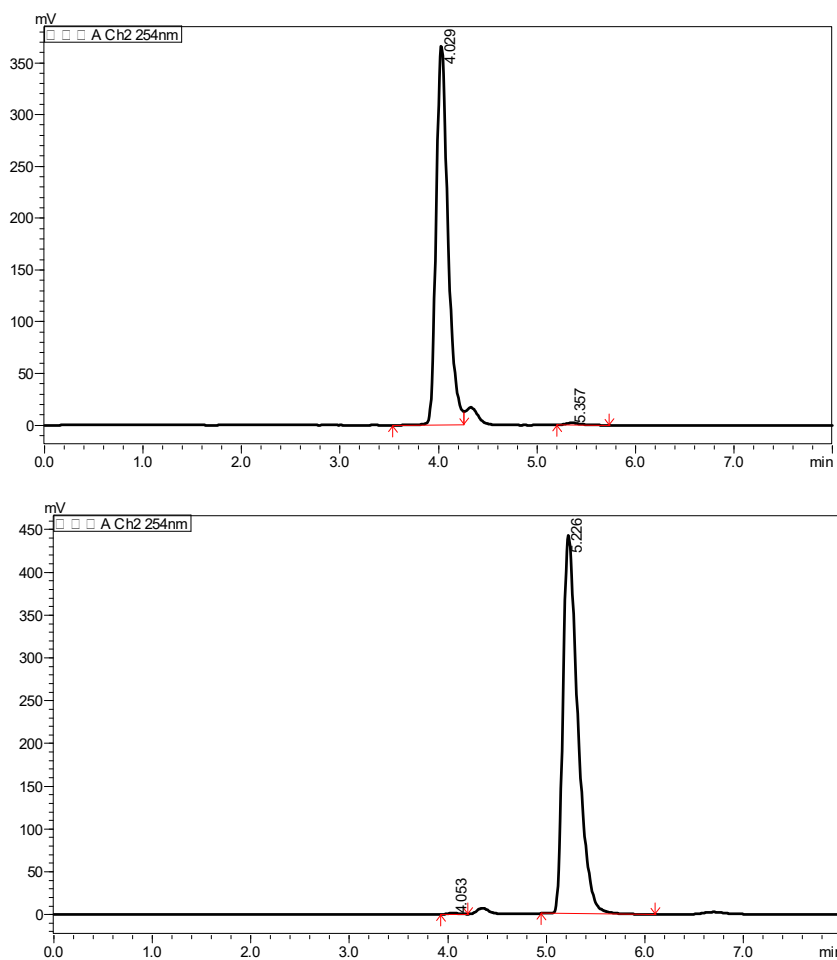

**Fig. S32** HPLC profile of TazBN eluted by Hexane/DCM (V/V = 50/50) using Daicel Chiralpak IE column. The flow rate is 1.0 ml/min. The ee% of both enantiomers are over 98%.



## 12. Calculated absorption properties

**Table S10** Absorption properties of TTABN based on the optimized ground-state geometries by TD-DFT at B3LYP/6-31G (d) in toluene

| Functional                                                | State          | Main configuration transition            |                     | $E_{VA}$ (eV) <sup>a</sup> | $\lambda_{VA}$ (nm) <sup>b</sup> | $f^c$  |
|-----------------------------------------------------------|----------------|------------------------------------------|---------------------|----------------------------|----------------------------------|--------|
| B3LYP                                                     | S1             | HOMO→LUMO                                | 0.70073             | 3.0586                     | 405.37                           | 0.2710 |
|                                                           | S2             | HOMO-1→LUMO                              | 0.69732             | 3.2447                     | 382.12                           | 0.3956 |
|                                                           | S3             | HOMO→LUMO+1                              | 0.68563             | 3.7070                     | 334.46                           | 0.0381 |
| PBE0                                                      | S <sub>1</sub> | HOMO→LUMO                                | 0.69884             | 3.1698                     | 391.14                           | 0.2887 |
|                                                           | S <sub>2</sub> | HOMO-1→LUMO                              | 0.69064             | 3.4037                     | 364.26                           | 0.4550 |
|                                                           | S <sub>3</sub> | HOMO-1→LUMO+4<br>HOMO→LUMO+1             | -0.11228<br>0.67793 | 3.8579                     | 321.38                           | 0.0407 |
| BMK                                                       | S <sub>1</sub> | HOMO→LUMO                                | 0.69452             | 3.3556                     | 369.49                           | 0.3793 |
|                                                           | S <sub>2</sub> | HOMO-1→LUMO<br>HOMO→LUMO+1               | 0.65894<br>0.16673  | 3.6767                     | 337.22                           | 0.5619 |
|                                                           | S <sub>3</sub> | HOMO-4→LUMO                              | 0.10405             | 4.1816                     | 296.50                           | 0.0210 |
|                                                           |                | HOMO-1→LUMO+2                            | -0.19725            |                            |                                  |        |
|                                                           |                | HOMO→LUMO+1<br>HOMO→LUMO+8               | 0.61996<br>0.17316  |                            |                                  |        |
| CAM-B3LYP                                                 | S <sub>1</sub> | HOMO→LUMO                                | 0.68452             | 3.5665                     | 347.63                           | 0.3938 |
|                                                           | S <sub>2</sub> | HOMO-3→LUMO                              | 0.14073             | 4.0030                     | 309.73                           | 0.6478 |
|                                                           |                | HOMO-1→LUMO                              | 0.61498             |                            |                                  |        |
|                                                           |                | HOMO-1→LUMO+1                            | 0.21009             |                            |                                  |        |
|                                                           |                | HOMO-1→LUMO+11                           | -0.10820            |                            |                                  |        |
|                                                           | S <sub>3</sub> | HOMO-4→LUMO                              | 0.14470             | 4.4118                     | 281.03                           | 0.0141 |
|                                                           |                | HOMO-1→LUMO+2                            | -0.18013            |                            |                                  |        |
|                                                           |                | HOMO-1→LUMO+3                            | 0.10117             |                            |                                  |        |
| HOMO→LUMO+1<br>HOMO→LUMO+7<br>HOMO→LUMO+8<br>HOMO→LUMO+12 |                | 0.55560<br>0.16966<br>0.12297<br>0.12361 |                     |                            |                                  |        |
| M06-2X                                                    | S <sub>1</sub> | HOMO→LUMO                                | 0.68758             | 3.5133                     | 352.89                           | 0.3754 |
|                                                           | S <sub>2</sub> | HOMO-3→LUMO                              | 0.11914             | 3.9204                     | 316.26                           | 0.6532 |
|                                                           |                | HOMO-1→LUMO                              | 0.62690             |                            |                                  |        |
|                                                           |                | HOMO-1→LUMO+1                            | 0.20983             |                            |                                  |        |
|                                                           |                | HOMO-1→LUMO+1                            | -0.10187            |                            |                                  |        |
|                                                           | S <sub>3</sub> | HOMO-4→LUMO                              | -0.12081            | 4.3286                     | 286.43                           | 0.0352 |
|                                                           |                | HOMO-1→LUMO+2                            | -0.13359            |                            |                                  |        |
| HOMO-1→LUMO+4                                             |                | 0.11308                                  |                     |                            |                                  |        |
| HOMO→LUMO+1<br>HOMO→LUMO+7<br>HOMO→LUMO+12                |                | 0.59221<br>0.18535<br>0.10823            |                     |                            |                                  |        |
| $\omega$ B97X-D                                           | S <sub>1</sub> | HOMO→LUMO                                | 0.67848             | 3.6195                     | 342.55                           | 0.3763 |
|                                                           | S <sub>2</sub> | HOMO-3→LUMO                              | 0.16226             | 4.1369                     | 299.70                           | 0.6016 |
|                                                           |                | HOMO-1→LUMO                              | 0.58587             |                            |                                  |        |
|                                                           |                | HOMO-1→LUMO+2                            | 0.21401             |                            |                                  |        |
|                                                           |                | HOMO-1→LUMO+7<br>HOMO-1→LUMO+11          | 0.12634<br>-0.10335 |                            |                                  |        |
| S <sub>3</sub>                                            | HOMO-2→LUMO    | 0.60260                                  | 4.4568              | 278.19                     | 0.0521                           |        |

|              |          |
|--------------|----------|
| HOMO→LUMO+3  | 0.13063  |
| HOMO→LUMO+6  | -0.12457 |
| HOMO→LUMO+10 | -0.19481 |

<sup>a</sup>Absorption energy. <sup>b</sup>Absorption wavelength. <sup>c</sup>Oscillator strength.

**Table S11** Absorption properties of TAZBN based on the optimized ground-state geometries by TD-DFT at B3LYP/6-31G (d) in toluene

| Functional      | State          | Main configuration transition | $E_{VA}$ (eV) <sup>a</sup> | $\lambda_{VA}$ (nm) <sup>b</sup> | $f^c$  |        |
|-----------------|----------------|-------------------------------|----------------------------|----------------------------------|--------|--------|
| B3LYP           | S <sub>1</sub> | HOMO→LUMO                     | 0.70073                    | 3.0268                           | 409.62 | 0.2395 |
|                 | S <sub>2</sub> | HOMO-1→LUMO                   | 0.66508                    | 3.5341                           | 350.83 | 0.3025 |
|                 |                | HOMO→LUMO+1                   | -0.20286                   |                                  |        |        |
|                 | S <sub>3</sub> | HOMO-2→LUMO                   | 0.19047                    | 3.7557                           | 330.13 | 0.1000 |
|                 |                | HOMO-1→LUMO                   | 0.19103                    |                                  |        |        |
|                 |                | HOMO→LUMO+1                   | 0.63000                    |                                  |        |        |
| PBE0            | S <sub>1</sub> | HOMO→LUMO                     | 0.70186                    | 3.0268                           | 427.57 | 0.1948 |
|                 | S <sub>2</sub> | HOMO-1→LUMO                   | 0.69051                    | 3.4153                           | 363.02 | 0.4404 |
|                 | S <sub>3</sub> | HOMO-2→LUMO                   | 0.69551                    | 3.6622                           | 338.56 | 0.0247 |
| BMK             | S <sub>1</sub> | HOMO→LUMO                     | 0.69407                    | 3.3633                           | 368.63 | 0.3223 |
|                 | S <sub>2</sub> | HOMO-2→LUMO                   | -0.14526                   | 3.9620                           | 312.94 | 0.3747 |
|                 |                | HOMO-1→LUMO                   | 0.63867                    |                                  |        |        |
|                 |                | HOMO→LUMO+1                   | 0.19729                    |                                  |        |        |
|                 | S <sub>3</sub> | HOMO-2→LUMO                   | 0.65229                    | 4.1981                           | 295.33 | 0.0019 |
|                 |                | HOMO-1→LUMO                   | 0.10450                    |                                  |        |        |
| HOMO→LUMO+9     |                | -0.10288                      |                            |                                  |        |        |
| CAM-B3LYP       | S <sub>1</sub> | HOMO→LUMO                     | 0.68356                    | 3.5761                           | 346.70 | 0.3392 |
|                 | S <sub>2</sub> | HOMO-2→LUMO                   | -0.18023                   | 4.1284                           | 300.32 | 0.4446 |
|                 |                | HOMO-1→LUMO                   | 0.62841                    |                                  |        |        |
|                 |                | HOMO→LUMO+1                   | 0.14982                    |                                  |        |        |
|                 | S <sub>3</sub> | HOMO-2→LUMO                   | 0.59488                    | 4.3857                           | 282.70 | 0.0014 |
|                 |                | HOMO-1→LUMO                   | 0.10369                    |                                  |        |        |
| HOMO→LUMO+1     |                | 0.17320                       |                            |                                  |        |        |
| M06-2X          | S <sub>1</sub> | HOMO→LUMO                     | 0.68633                    | 3.5369                           | 350.55 | 0.3352 |
|                 | S <sub>2</sub> | HOMO-2→LUMO                   | -0.18404                   | 4.0601                           | 305.37 | 0.4922 |
|                 |                | HOMO-1→LUMO                   | 0.63636                    |                                  |        |        |
|                 |                | HOMO→LUMO+1                   | 0.13818                    |                                  |        |        |
|                 | S <sub>3</sub> | HOMO-2→LUMO                   | 0.61899                    | 4.3420                           | 285.54 | 0.0027 |
|                 |                | HOMO-1→LUMO                   | 0.13822                    |                                  |        |        |
| HOMO→LUMO+9     |                | -0.11233                      |                            |                                  |        |        |
| $\omega$ B97X-D | S <sub>1</sub> | HOMO→LUMO                     | 0.67787                    | 3.6168                           | 342.80 | 0.3478 |
|                 | S <sub>2</sub> | HOMO-2→LUMO                   | -0.24617                   | 4.1692                           | 297.38 | 0.4325 |
|                 |                | HOMO-1→LUMO                   | 0.60345                    |                                  |        |        |
|                 |                | HOMO→LUMO+1                   | 0.13614                    |                                  |        |        |
|                 | S <sub>3</sub> | HOMO-2→LUMO                   | 0.55391                    | 4.4139                           | 280.90 | 0.000  |
|                 |                | HOMO-1→LUMO                   | 0.15901                    |                                  |        |        |
| HOMO→LUMO+1     |                | 0.19912                       |                            |                                  |        |        |
|                 |                | HOMO→LUMO+9                   | 0.14015                    |                                  |        |        |

<sup>a</sup>Vertical absorption energy. <sup>b</sup>Vertical absorption wavelength. <sup>c</sup>Oscillator strength.

**Table S12** Calculated vertical absorption and singlet-triplet splitting energies of TTABN and TAzBN based on the optimized ground-state geometries in toluene and the solid phase.

| Method          | $\Delta E_{VA}(S_1)^a$<br>[nm] | $\Delta E_{VA}(T_1)^b$<br>[eV] | $\Delta E_{VA}(T_2)^b$<br>[eV] | $\Delta E_{VA}(T_3)^b$<br>[eV] | $\Delta E_{SIT1-VA}^c$<br>[eV] | $\Delta E_{SIT2-VA}^c$<br>[eV] | $\Delta E_{SIT3-VA}^c$<br>[eV] |
|-----------------|--------------------------------|--------------------------------|--------------------------------|--------------------------------|--------------------------------|--------------------------------|--------------------------------|
| TTABN (Toluene) |                                |                                |                                |                                |                                |                                |                                |
| B3LYP           | 2.82                           | 2.61                           | 2.90                           | 3.16                           | 0.45                           | 0.16                           | -0.10                          |
| PBE0            | 3.06                           | 2.69                           | 2.92                           | 3.10                           | 0.48                           | 0.25                           | 0.07                           |
| BMK             | 3.17                           | 2.83                           | 3.18                           | 3.40                           | 0.52                           | 0.18                           | -0.05                          |
| CAM-B3LYP       | 3.36                           | 2.98                           | 3.09                           | 3.19                           | 0.59                           | 0.48                           | 0.37                           |
| M06-2X          | 3.57                           | 3.00                           | 3.37                           | 3.37                           | 0.51                           | 0.15                           | 0.15                           |
| $\omega$ B97X-D | 3.51                           | 3.06                           | 3.23                           | 3.39                           | 0.56                           | 0.39                           | 0.23                           |
| TAzBN (Toluene) |                                |                                |                                |                                |                                |                                |                                |
| B3LYP           | 2.87                           | 2.66                           | 2.98                           | 3.21                           | 0.37                           | 0.05                           | -0.18                          |
| PBE0            | 3.03                           | 2.57                           | 2.81                           | 3.18                           | 0.33                           | 0.09                           | -0.28                          |
| BMK             | 2.90                           | 2.93                           | 3.23                           | 3.51                           | 0.44                           | 0.14                           | -0.15                          |
| CAM-B3LYP       | 3.36                           | 3.04                           | 3.10                           | 3.32                           | 0.54                           | 0.48                           | 0.25                           |
| M06-2X          | 3.58                           | 3.10                           | 3.34                           | 3.70                           | 0.44                           | 0.19                           | -0.17                          |
| $\omega$ B97X-D | 3.54                           | 3.11                           | 3.21                           | 3.46                           | 0.51                           | 0.41                           | 0.16                           |
| TTABN (Solid)   |                                |                                |                                |                                |                                |                                |                                |
| B3LYP           | 3.05                           | 2.62                           | 2.95                           | 3.17                           | 0.43                           | 0.10                           | -0.12                          |
| PBE0            | 3.16                           | 2.69                           | 2.95                           | 3.14                           | 0.47                           | 0.21                           | 0.02                           |
| BMK             | 3.37                           | 2.85                           | 3.20                           | 3.44                           | 0.51                           | 0.16                           | -0.08                          |
| CAM-B3LYP       | 3.58                           | 2.99                           | 3.08                           | 3.24                           | 0.58                           | 0.50                           | 0.34                           |
| M06-2X          | 3.52                           | 3.00                           | 3.35                           | 3.60                           | 0.52                           | 0.16                           | -0.08                          |
| $\omega$ B97X-D | 3.61                           | 3.04                           | 3.19                           | 3.38                           | 0.57                           | 0.42                           | 0.23                           |
| TAzBN (Solid)   |                                |                                |                                |                                |                                |                                |                                |
| B3LYP           | 3.03                           | 2.62                           | 2.95                           | 3.17                           | 0.43                           | 0.10                           | -0.12                          |
| PBE0            | 3.15                           | 2.69                           | 2.95                           | 3.14                           | 0.47                           | 0.21                           | 0.02                           |
| BMK             | 3.37                           | 2.85                           | 3.20                           | 3.44                           | 0.51                           | 0.16                           | -0.08                          |
| CAM-B3LYP       | 3.59                           | 2.99                           | 3.08                           | 3.24                           | 0.58                           | 0.50                           | 0.34                           |
| M06-2X          | 3.54                           | 3.00                           | 3.35                           | 3.60                           | 0.52                           | 0.16                           | -0.08                          |
| $\omega$ B97X-D | 3.63                           | 3.04                           | 3.19                           | 3.38                           | 0.57                           | 0.42                           | 0.23                           |

<sup>a</sup>The vertical absorption energy of  $S_1$ . <sup>b</sup>The vertical absorption energy of  $T_1/T_2/T_3$ . <sup>c</sup>The vertical absorption energy gap between  $S_1$  and  $T_1/T_2/T_3$ .

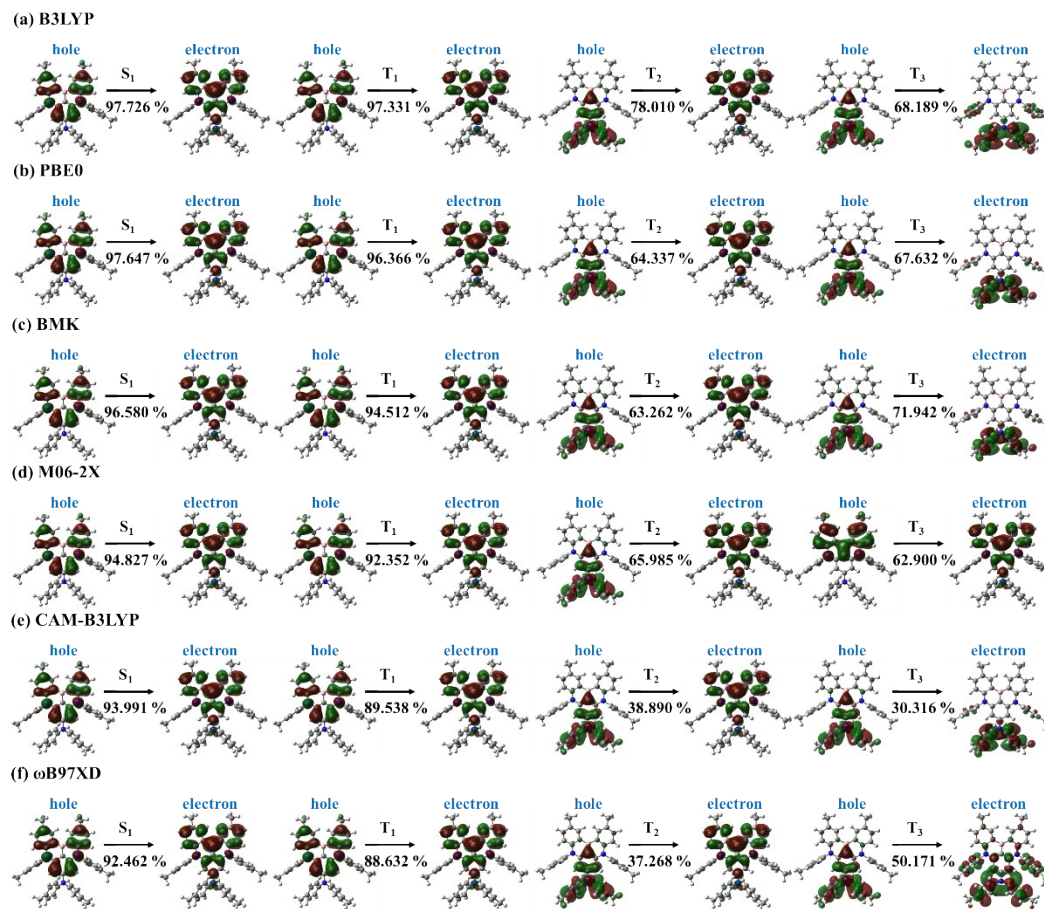

**Fig. S33** Hole and electron natural transition orbitals (NTOs) in the  $S_1$ ,  $T_1$ ,  $T_2$  and  $T_3$  states of TTABN by TD-DFT based on the optimized ground-state geometries in toluene. The percentages are the predominant hole and electron wave functions with the largest weight.

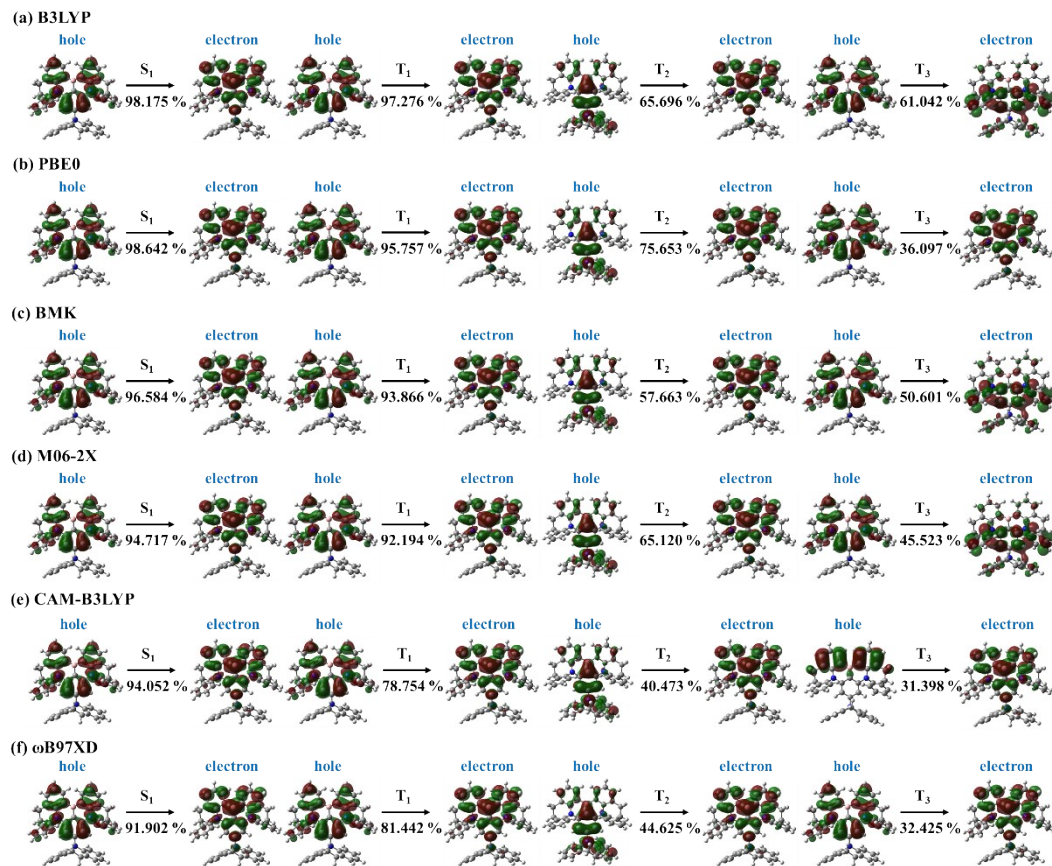

**Fig. S34** Hole and electron natural transition orbitals (NTOs) in the  $S_1$ ,  $T_1$ ,  $T_2$  and  $T_3$  states of TazBN by TD-DFT based on the optimized ground-state geometries in toluene. The percentages are the predominant hole and electron wave functions with the largest weight.

### 13. Optimized geometries and vibrational frequencies

**Table S13** Cartesian coordinates of optimized  $S_0$  and  $S_1$  states of TTABN in toluene at B3LYP/6-31G(d) by (TDA)-DFT, respectively.

| Elements | $S_0$    |          |          | $S_1$    |          |          |
|----------|----------|----------|----------|----------|----------|----------|
|          | X        | Y        | Z        | X        | Y        | Z        |
| C        | -0.73713 | -1.21892 | -0.13608 | 0.75744  | -1.19842 | 0.15244  |
| C        | 1.34398  | 0.01161  | 0.00151  | -1.36553 | 0.00920  | -0.00110 |
| H        | -5.64495 | -0.82537 | 0.59276  | 5.70505  | -0.86958 | -0.48397 |
| C        | -3.64604 | -1.42974 | 0.08005  | 3.67450  | -1.41962 | -0.02730 |
| C        | -5.01022 | -1.67473 | 0.36306  | 5.04486  | -1.69845 | -0.25256 |
| C        | -2.81360 | -2.56735 | -0.11106 | 2.83327  | -2.56877 | 0.16156  |
| C        | -4.74037 | -4.03173 | 0.12392  | 4.74956  | -4.06576 | 0.02112  |
| C        | -5.58361 | -2.94052 | 0.39658  | 5.60019  | -2.98520 | -0.22592 |
| N        | 2.76210  | 0.02414  | 0.00209  | -2.78065 | 0.01857  | -0.00141 |
| H        | -5.14852 | -5.04077 | 0.12168  | 5.14602  | -5.07737 | 0.06008  |
| C        | -0.75829 | 1.20580  | 0.13759  | 0.77325  | 1.18860  | -0.15295 |
| C        | -1.48339 | -0.01297 | 0.00065  | 1.49912  | -0.00975 | -0.00004 |

|   |          |          |          |          |          |          |
|---|----------|----------|----------|----------|----------|----------|
| C | -2.85798 | 2.51786  | 0.11190  | 2.86720  | 2.53128  | -0.16178 |
| C | -5.03868 | 1.58699  | -0.36204 | 5.06705  | 1.63174  | 0.25247  |
| H | -5.65849 | 0.72666  | -0.59165 | 5.71622  | 0.79423  | 0.48399  |
| C | -5.63408 | 2.84258  | -0.39570 | 5.63944  | 2.91098  | 0.22543  |
| C | -3.67043 | 1.36586  | -0.07906 | 3.69307  | 1.37110  | 0.02737  |
| C | -4.81000 | 3.94838  | -0.12332 | 4.80324  | 4.00270  | -0.02171 |
| H | -5.23567 | 4.95015  | -0.12126 | 5.21309  | 5.00895  | -0.06089 |
| C | 0.66403  | -1.20153 | -0.16100 | -0.66482 | -1.18836 | 0.18438  |
| H | 1.23347  | -2.10914 | -0.29804 | -1.22145 | -2.10027 | 0.34570  |
| C | 0.64294  | 1.21280  | 0.16332  | -0.64902 | 1.19735  | -0.18580 |
| H | 1.19643  | 2.13017  | 0.30071  | -1.19341 | 2.11660  | -0.34727 |
| B | -2.99580 | -0.02616 | 0.00054  | 3.03269  | -0.01991 | 0.00016  |
| C | 3.47272  | 1.08938  | -0.61907 | -3.48533 | 1.06177  | 0.66247  |
| C | 3.08702  | 1.57137  | -1.87985 | -3.07289 | 1.51530  | 1.92534  |
| C | 4.58674  | 1.66804  | 0.00654  | -4.61103 | 1.65544  | 0.07159  |
| C | 3.79275  | 2.60845  | -2.48442 | -3.76486 | 2.53988  | 2.56682  |
| H | 2.23495  | 1.12573  | -2.38340 | -2.21355 | 1.05662  | 2.40476  |
| C | 5.29462  | 2.69278  | -0.61881 | -5.30419 | 2.66598  | 0.73435  |
| H | 4.89954  | 1.30710  | 0.98138  | -4.94374 | 1.31732  | -0.90479 |
| C | 4.91101  | 3.19065  | -1.87082 | -4.89433 | 3.13644  | 1.98933  |
| H | 3.47653  | 2.96096  | -3.46403 | -3.42828 | 2.86988  | 3.54735  |
| H | 6.15800  | 3.12144  | -0.11441 | -6.17718 | 3.10626  | 0.25731  |
| C | 3.49190  | -1.02985 | 0.62038  | -3.49965 | -1.01657 | -0.66261 |
| C | 4.61033  | -1.59326 | -0.01228 | -4.62820 | -1.59927 | -0.06524 |
| C | 3.11569  | -1.52265 | 1.87927  | -3.09361 | -1.48017 | -1.92337 |
| C | 5.33302  | -2.61118 | 0.60619  | -5.33164 | -2.60645 | -0.72132 |
| H | 4.90891  | -1.23108 | -0.99112 | -4.94913 | -1.26069 | 0.91493  |
| C | 3.83683  | -2.55351 | 2.47736  | -3.79636 | -2.50196 | -2.55854 |
| H | 2.25377  | -1.09693 | 2.38330  | -2.22567 | -1.03822 | -2.40301 |
| C | 4.96378  | -3.11442 | 1.86088  | -4.93287 | -3.08152 | -1.97862 |
| H | 6.19500  | -3.03287 | 0.09343  | -6.20209 | -3.04315 | -0.23628 |
| H | 3.52309  | -2.91967 | 3.45267  | -3.46002 | -2.84498 | -3.53458 |
| N | -1.46393 | 2.40935  | 0.27815  | 1.45745  | 2.39400  | -0.29571 |
| C | -0.70959 | 3.61084  | 0.53788  | 0.68897  | 3.59326  | -0.53539 |
| C | -0.47953 | 4.01695  | 1.85382  | 0.43901  | 4.00573  | -1.84540 |
| C | -0.21004 | 4.37635  | -0.51882 | 0.20364  | 4.34625  | 0.53632  |
| C | 0.24462  | 5.18195  | 2.10725  | -0.30329 | 5.16390  | -2.07781 |
| H | -0.87337 | 3.42111  | 2.67200  | 0.82850  | 3.42125  | -2.67359 |
| C | 0.51339  | 5.53887  | -0.25523 | -0.53757 | 5.50168  | 0.29166  |
| H | -0.39367 | 4.05907  | -1.54108 | 0.40998  | 4.02513  | 1.55289  |
| C | 0.75601  | 5.96023  | 1.05985  | -0.80645 | 5.92877  | -1.01663 |
| H | 0.41410  | 5.49097  | 3.13598  | -0.49345 | 5.47733  | -3.10142 |
| H | 0.89523  | 6.12847  | -1.08529 | -0.91292 | 6.08064  | 1.13196  |
| C | 1.56766  | 7.20351  | 1.33937  | -1.63672 | 7.16433  | -1.27375 |
| H | 2.63939  | 6.97090  | 1.39493  | -2.70759 | 6.92239  | -1.29565 |
| H | 1.43884  | 7.95207  | 0.55052  | -1.48995 | 7.91553  | -0.49064 |
| H | 1.28439  | 7.66097  | 2.29293  | -1.38640 | 7.62181  | -2.23633 |
| C | 5.65870  | 4.32823  | -2.52645 | -5.62708 | 4.26065  | 2.68342  |
| H | 6.69864  | 4.37317  | -2.18603 | -6.68588 | 4.28191  | 2.40410  |
| H | 5.66416  | 4.22857  | -3.61757 | -5.56657 | 4.16573  | 3.77308  |
| H | 5.19863  | 5.29840  | -2.29374 | -5.20289 | 5.23937  | 2.42030  |

|   |          |          |          |          |          |          |
|---|----------|----------|----------|----------|----------|----------|
| C | 5.76661  | -4.20214 | 2.53573  | -5.71521 | -4.15926 | -2.69212 |
| H | 6.24590  | -4.85996 | 1.80248  | -6.16879 | -4.86119 | -1.98370 |
| H | 6.56458  | -3.78190 | 3.16315  | -6.53146 | -3.73285 | -3.29110 |
| H | 5.13786  | -4.82077 | 3.18520  | -5.07828 | -4.73169 | -3.37483 |
| C | -7.04685 | -3.14732 | 0.71079  | 7.08158  | -3.18739 | -0.43637 |
| H | -7.55054 | -2.19415 | 0.90154  | 7.45107  | -2.58810 | -1.27746 |
| H | -7.57195 | -3.64106 | -0.11727 | 7.65783  | -2.88218 | 0.44807  |
| H | -7.18500 | -3.77971 | 1.59733  | 7.31978  | -4.23719 | -0.63755 |
| C | -7.10077 | 3.02373  | -0.70967 | 7.12343  | 3.09348  | 0.43567  |
| H | -7.25017 | 3.65514  | -1.59507 | 7.37562  | 4.14004  | 0.63667  |
| H | -7.58731 | 2.06204  | -0.90216 | 7.48501  | 2.48945  | 1.27682  |
| H | -7.63467 | 3.50648  | 0.11924  | 7.69548  | 2.78048  | -0.44878 |
| N | -1.42166 | -2.43454 | -0.27717 | 1.42552  | -2.41284 | 0.29533  |
| C | -0.64633 | -3.62256 | -0.53713 | 0.64097  | -3.60185 | 0.53419  |
| C | -0.40860 | -4.02398 | -1.85305 | 0.38444  | -4.01122 | 1.84381  |
| C | -0.13338 | -4.37938 | 0.51953  | 0.14632  | -4.34796 | -0.53818 |
| C | 0.33672  | -5.17565 | -2.10661 | -0.37379 | -5.15933 | 2.07527  |
| H | -0.81279 | -3.43507 | -2.67120 | 0.78110  | -3.43231 | 2.67251  |
| C | 0.61117  | -5.52834 | 0.25585  | -0.61072 | -5.49315 | -0.29450 |
| H | -0.32300 | -4.06572 | 1.54182  | 0.35778  | -4.02928 | -1.55447 |
| C | 0.86188  | -5.94475 | -1.05938 | -0.88646 | -5.91691 | 1.01355  |
| H | 0.51217  | -5.48115 | -3.13537 | -0.56907 | -5.47039 | 3.09863  |
| H | 1.00368  | -6.11104 | 1.08580  | -0.99352 | -6.06658 | -1.13522 |
| C | 1.69629  | -7.17297 | -1.33844 | -1.73369 | -7.14123 | 1.26903  |
| H | 1.43675  | -7.62325 | -2.30207 | -1.50592 | -7.59011 | 2.24114  |
| H | 2.76537  | -6.92448 | -1.37144 | -2.80229 | -6.88859 | 1.26758  |
| H | 1.56424  | -7.93249 | -0.56059 | -1.57990 | -7.90276 | 0.49723  |
| C | -3.45466 | 3.79958  | 0.11818  | 3.42681  | 3.81663  | -0.20436 |
| H | -2.85307 | 4.68224  | 0.29394  | 2.80143  | 4.68476  | -0.36671 |
| C | -3.38785 | -3.85929 | -0.11760 | 3.37577  | -3.86147 | 0.20390  |
| H | -2.77097 | -4.73129 | -0.29356 | 2.73891  | -4.72123 | 0.36616  |

**Table S14** Cartesian coordinates of optimized  $T_1$  and  $T_2$  states of TTABN in toluene at B3LYP/6-31G(d) by TDA-DFT.

| Elements | X        | Y        | Z        | T <sub>1</sub> |          |          | T <sub>2</sub> |          |          |
|----------|----------|----------|----------|----------------|----------|----------|----------------|----------|----------|
|          |          |          |          | X              | Y        | Z        | X              | Y        | Z        |
| C        | 0.74619  | -1.19826 | 0.16062  | 0.70730        | -1.22202 | 0.14486  | 0.70730        | -1.22202 | 0.14486  |
| C        | -1.37091 | 0.00586  | -0.00078 | -1.38367       | -0.00564 | 0.00134  | -1.38367       | -0.00564 | 0.00134  |
| H        | 5.69008  | -0.85792 | -0.47546 | 5.61402        | -0.75116 | -0.62410 | 5.61402        | -0.75116 | -0.62410 |
| C        | 3.66314  | -1.41083 | -0.01125 | 3.63107        | -1.38487 | -0.09340 | 3.63107        | -1.38487 | -0.09340 |
| C        | 5.03230  | -1.68669 | -0.23825 | 4.99265        | -1.61152 | -0.39519 | 4.99265        | -1.61152 | -0.39519 |
| C        | 2.82593  | -2.56362 | 0.18697  | 2.82299        | -2.54598 | 0.09975  | 2.82299        | -2.54598 | 0.09975  |
| C        | 4.74728  | -4.05553 | 0.05283  | 4.77035        | -3.98022 | -0.18710 | 4.77035        | -3.98022 | -0.18710 |
| C        | 5.59266  | -2.96826 | -0.20513 | 5.58670        | -2.87732 | -0.44413 | 5.58670        | -2.87732 | -0.44413 |
| N        | -2.79288 | 0.01158  | -0.00147 | -2.80143       | -0.01033 | 0.00176  | -2.80143       | -0.01033 | 0.00176  |
| H        | 5.14993  | -5.06440 | 0.09492  | 5.19028        | -4.98415 | -0.20363 | 5.19028        | -4.98415 | -0.20363 |
| C        | 0.75586  | 1.19298  | -0.16129 | 0.69918        | 1.22450  | -0.14424 | 0.69918        | 1.22450  | -0.14424 |
| C        | 1.49695  | -0.00565 | -0.00030 | 1.44595        | 0.00367  | -0.00013 | 1.44595        | 0.00367  | -0.00013 |

|   |          |          |          |          |          |          |
|---|----------|----------|----------|----------|----------|----------|
| C | 2.84664  | 2.54144  | -0.18788 | 2.80629  | 2.56221  | -0.10198 |
| C | 5.04588  | 1.64667  | 0.23719  | 4.98261  | 1.64174  | 0.39018  |
| H | 5.69693  | 0.81263  | 0.47452  | 5.60975  | 0.78540  | 0.61842  |
| C | 5.61668  | 2.92358  | 0.20350  | 5.56863  | 2.91129  | 0.43793  |
| C | 3.67445  | 1.38192  | 0.01052  | 3.62208  | 1.40633  | 0.09028  |
| C | 4.78016  | 4.01763  | -0.05473 | 4.74491  | 4.00890  | 0.18159  |
| H | 5.19104  | 5.02316  | -0.09732 | 5.15850  | 5.01548  | 0.19716  |
| C | -0.66417 | -1.19046 | 0.18681  | -0.68345 | -1.23029 | 0.13715  |
| H | -1.22269 | -2.10325 | 0.34278  | -1.24389 | -2.14464 | 0.27432  |
| C | -0.65453 | 1.19653  | -0.18779 | -0.69158 | 1.22367  | -0.13499 |
| H | -1.20568 | 2.11377  | -0.34393 | -1.25818 | 2.13429  | -0.27168 |
| B | 3.01227  | -0.01178 | -0.00024 | 2.95952  | 0.00856  | -0.00105 |
| C | -3.48885 | 0.94968  | 0.80539  | -3.49995 | 0.93898  | 0.76986  |
| C | -3.01489 | 1.28552  | 2.08428  | -2.97532 | 1.36781  | 2.00874  |
| C | -4.65876 | 1.57594  | 0.34349  | -4.70641 | 1.50623  | 0.30363  |
| C | -3.69004 | 2.22003  | 2.86617  | -3.65460 | 2.31670  | 2.75765  |
| H | -2.11842 | 0.80593  | 2.46455  | -2.05753 | 0.92446  | 2.37697  |
| C | -5.33184 | 2.49475  | 1.14482  | -5.36523 | 2.45882  | 1.06615  |
| H | -5.04067 | 1.33540  | -0.64360 | -5.09946 | 1.21308  | -0.66368 |
| C | -4.86203 | 2.84431  | 2.41855  | -4.85833 | 2.88715  | 2.30659  |
| H | -3.30284 | 2.45661  | 3.85516  | -3.24968 | 2.61813  | 3.72016  |
| H | -6.23811 | 2.96051  | 0.76302  | -6.28708 | 2.89330  | 0.68816  |
| C | -3.49591 | -0.92348 | -0.80598 | -3.49481 | -0.96361 | -0.76639 |
| C | -4.66376 | -1.54885 | -0.33723 | -4.69501 | -1.54170 | -0.29674 |
| C | -3.02592 | -1.26460 | -2.08469 | -2.96777 | -1.39065 | -2.00435 |
| C | -5.34059 | -2.46914 | -1.13341 | -5.34693 | -2.50051 | -1.05675 |
| H | -5.03577 | -1.31270 | 0.65471  | -5.08417 | -1.25653 | 0.67455  |
| C | -3.70489 | -2.20075 | -2.86161 | -3.64056 | -2.34655 | -2.75123 |
| H | -2.12456 | -0.79476 | -2.46560 | -2.04984 | -0.94648 | -2.37111 |
| C | -4.87934 | -2.81770 | -2.41067 | -4.84154 | -2.92157 | -2.30089 |
| H | -6.24108 | -2.93972 | -0.74383 | -6.26021 | -2.94796 | -0.67302 |
| H | -3.31659 | -2.44656 | -3.84785 | -3.23021 | -2.65159 | -3.71020 |
| N | 1.44590  | 2.40572  | -0.32045 | 1.40938  | 2.42979  | -0.31918 |
| C | 0.67117  | 3.59758  | -0.57869 | 0.64957  | 3.61412  | -0.60999 |
| C | 0.41940  | 3.98764  | -1.89489 | 0.42943  | 3.99169  | -1.93721 |
| C | 0.17893  | 4.36253  | 0.48113  | 0.12577  | 4.40144  | 0.42044  |
| C | -0.32651 | 5.13946  | -2.14550 | -0.30252 | 5.14329  | -2.22739 |
| H | 0.81159  | 3.39206  | -2.71383 | 0.84354  | 3.38311  | -2.73584 |
| C | -0.56599 | 5.51129  | 0.21820  | -0.60547 | 5.55121  | 0.12191  |
| H | 0.38342  | 4.05660  | 1.50272  | 0.30356  | 4.11225  | 1.45217  |
| C | -0.83419 | 5.91815  | -1.09666 | -0.83480 | 5.94093  | -1.20508 |
| H | -0.51598 | 5.43707  | -3.17392 | -0.45852 | 5.42918  | -3.26519 |
| H | -0.94488 | 6.10102  | 1.04931  | -1.00015 | 6.15849  | 0.93347  |
| C | -1.66836 | 7.14687  | -1.37312 | -1.65033 | 7.17253  | -1.52451 |
| H | -2.73873 | 6.90225  | -1.38381 | -2.71572 | 6.92752  | -1.63106 |
| H | -1.51877 | 7.91348  | -0.60561 | -1.56803 | 7.92423  | -0.73244 |
| H | -1.42453 | 7.58583  | -2.34590 | -1.32868 | 7.63296  | -2.46458 |
| C | -5.57646 | 3.87289  | 3.26384  | -5.56531 | 3.94749  | 3.11104  |
| H | -6.65803 | 3.85427  | 3.09023  | -6.64518 | 3.93475  | 2.93142  |
| H | -5.40339 | 3.70312  | 4.33211  | -5.39300 | 3.81701  | 4.18433  |
| H | -5.23109 | 4.89129  | 3.03803  | -5.20297 | 4.94974  | 2.84418  |



|   |          |          |          |          |          |          |
|---|----------|----------|----------|----------|----------|----------|
| C | -5.63344 | -3.80100 | -3.27515 | -5.57688 | -3.94247 | -3.13069 |
| H | -6.13491 | -4.56469 | -2.67023 | -6.07561 | -4.68665 | -2.50078 |
| H | -6.40959 | -3.30126 | -3.87105 | -6.35410 | -3.46501 | -3.74310 |
| H | -4.96594 | -4.31147 | -3.97776 | -4.90104 | -4.46696 | -3.81323 |
| C | 7.07421  | -3.16996 | -0.41170 | 7.06131  | -3.03756 | -0.73700 |
| H | 7.49686  | -2.39534 | -1.06078 | 7.39786  | -2.32735 | -1.50162 |
| H | 7.61855  | -3.12543 | 0.54201  | 7.67599  | -2.85957 | 0.15658  |
| H | 7.28861  | -4.14653 | -0.85981 | 7.29214  | -4.04805 | -1.09266 |
| C | 7.09987  | 3.11327  | 0.40975  | 7.04259  | 3.08106  | 0.72870  |
| H | 7.32221  | 4.08777  | 0.85851  | 7.26721  | 4.09263  | 1.08529  |
| H | 7.51651  | 2.33482  | 1.05813  | 7.38507  | 2.37215  | 1.49188  |
| H | 7.64355  | 3.06512  | -0.54416 | 7.65704  | 2.90835  | -0.16607 |
| N | 1.42640  | -2.41653 | 0.31987  | 1.42555  | -2.42255 | 0.31904  |
| C | 0.64203  | -3.60200 | 0.57854  | 0.67384  | -3.61169 | 0.61139  |
| C | 0.38838  | -3.99033 | 1.89486  | 0.45900  | -3.99070 | 1.93902  |
| C | 0.14208  | -4.36234 | -0.48102 | 0.15254  | -4.40209 | -0.41799 |
| C | -0.36716 | -5.13580 | 2.14587  | -0.26541 | -5.14674 | 2.23068  |
| H | 0.78652  | -3.39841 | 2.71358  | 0.87119  | -3.37972 | 2.73680  |
| C | -0.61252 | -5.50463 | -0.21771 | -0.57124 | -5.55615 | -0.11800 |
| H | 0.34798  | -4.05774 | -1.50273 | 0.32624  | -4.11169 | -1.45008 |
| C | -0.88275 | -5.90964 | 1.09734  | -0.79530 | -5.94733 | 1.20950  |
| H | -0.55806 | -5.43213 | 3.17439  | -0.41742 | -5.43366 | 3.26878  |
| H | -0.99770 | -6.09059 | -1.04859 | -0.96439 | -6.16551 | -0.92872 |
| C | -1.72728 | -7.13120 | 1.37408  | -1.60306 | -7.18366 | 1.53036  |
| H | -1.49125 | -7.56862 | 2.34945  | -1.28311 | -7.63710 | 2.47437  |
| H | -2.79584 | -6.87864 | 1.37870  | -2.67089 | -6.94637 | 1.62958  |
| H | -1.57980 | -7.90152 | 0.60985  | -1.51063 | -7.93845 | 0.74232  |
| C | 3.41003  | 3.82981  | -0.23866 | 3.38071  | 3.84209  | -0.07594 |
| H | 2.78236  | 4.69529  | -0.40657 | 2.77096  | 4.72163  | -0.24216 |
| C | 3.37877  | -3.85659 | 0.23710  | 3.40546  | -3.82217 | 0.07237  |
| H | 2.74405  | -4.71697 | 0.40471  | 2.80149  | -4.70559 | 0.23908  |

**Table S15** Cartesian coordinates of optimized T<sub>3</sub> state of TTABN in toluene at B3LYP/6-31G(d) by TDA-DFT.

| Elements | X        | Y        | Z        |
|----------|----------|----------|----------|
| B        | 0.72542  | -1.20173 | 0.15482  |
| C        | -1.36490 | 0.00236  | -0.00066 |
| C        | 5.66657  | -0.83194 | -0.54013 |
| C        | 3.65354  | -1.40036 | -0.03689 |
| C        | 5.01843  | -1.66351 | -0.28427 |
| H        | 2.82552  | -2.55071 | 0.16800  |
| H        | 4.77377  | -4.04040 | 0.01356  |
| H        | 5.60046  | -2.96037 | -0.25741 |
| C        | -2.79229 | 0.00486  | -0.00100 |
| H        | 5.17966  | -5.04746 | 0.06085  |
| C        | 0.72966  | 1.19909  | -0.15564 |
| H        | 1.46779  | -0.00264 | -0.00048 |
| H        | 2.83465  | 2.54051  | -0.16954 |

|   |          |          |          |
|---|----------|----------|----------|
| C | 5.02461  | 1.64537  | 0.28140  |
| N | 5.66989  | 0.81148  | 0.53693  |
| C | 5.61135  | 2.94013  | 0.25406  |
| C | 3.65861  | 1.38716  | 0.03491  |
| H | 4.78844  | 4.02313  | -0.01650 |
| C | 5.19797  | 5.02869  | -0.06418 |
| H | -0.67368 | -1.20419 | 0.16942  |
| C | -1.23791 | -2.11582 | 0.30746  |
| C | -0.66943 | 1.20652  | -0.17035 |
| H | -1.23045 | 2.12011  | -0.30854 |
| C | 2.99622  | -0.00540 | -0.00077 |
| H | -3.48980 | 0.92274  | 0.82299  |
| H | -3.00939 | 1.24024  | 2.10547  |
| H | -4.66960 | 1.54558  | 0.38061  |
| C | -3.68922 | 2.15073  | 2.90910  |
| H | -2.10503 | 0.76265  | 2.46823  |
| C | -5.34553 | 2.44340  | 1.20305  |
| C | -5.05456 | 1.32173  | -0.60906 |
| H | -4.87098 | 2.77224  | 2.48021  |
| C | -3.29858 | 2.37219  | 3.90023  |
| C | -6.25774 | 2.90892  | 0.83564  |
| C | -3.49309 | -0.91190 | -0.82370 |
| N | -4.66929 | -1.53796 | -0.37541 |
| C | -3.01477 | -1.23277 | -2.10568 |
| C | -5.34543 | -2.43928 | -1.19329 |
| C | -5.04583 | -1.31999 | 0.61883  |
| C | -3.69497 | -2.14720 | -2.90513 |
| C | -2.10692 | -0.76195 | -2.46857 |
| H | -4.87731 | -2.76525 | -2.47390 |
| H | -6.25079 | -2.91270 | -0.81893 |
| H | -3.30176 | -2.37672 | -3.89332 |
| C | 1.44807  | 2.41552  | -0.32029 |
| H | 0.67548  | 3.60409  | -0.58883 |
| H | 0.42291  | 3.98236  | -1.90846 |
| H | 0.17521  | 4.37541  | 0.46306  |
| C | -0.32595 | 5.12998  | -2.17054 |
| C | 0.81720  | 3.38025  | -2.72162 |
| H | -0.57206 | 5.52017  | 0.18929  |
| C | 0.37627  | 4.07727  | 1.48763  |
| H | -0.83853 | 5.91558  | -1.12948 |
| C | -0.51286 | 5.41937  | -3.20185 |
| C | -0.95375 | 6.11628  | 1.01467  |
| H | -1.67565 | 7.13973  | -1.41770 |
| C | -2.74574 | 6.89362  | -1.42214 |
| H | -1.52501 | 7.91570  | -0.65973 |
| H | -1.43561 | 7.56776  | -2.39631 |
| H | -5.58832 | 3.77696  | 3.35082  |
| C | -6.65892 | 3.81352  | 3.12238  |
| H | -5.47774 | 3.53734  | 4.41425  |
| H | -5.19145 | 4.79139  | 3.20629  |
| N | -5.63069 | -3.72601 | -3.36346 |

|   |          |          |          |
|---|----------|----------|----------|
| C | -6.18162 | -4.46840 | -2.77562 |
| C | -6.36457 | -3.20216 | -3.99146 |
| H | -4.95467 | -4.26276 | -4.03796 |
| C | 7.07453  | -3.12970 | -0.51381 |
| H | 7.35382  | -2.73065 | -1.49819 |
| C | 7.67329  | -2.58233 | 0.22669  |
| C | 7.37276  | -4.18212 | -0.47812 |
| H | 7.08618  | 3.10409  | 0.50954  |
| H | 7.38828  | 4.15538  | 0.47338  |
| H | 7.36456  | 2.70428  | 1.49387  |
| C | 7.68247  | 2.55429  | -0.23115 |
| H | 1.43950  | -2.42067 | 0.31964  |
| C | 0.66279  | -3.60626 | 0.58954  |
| H | 0.41071  | -3.98320 | 1.90963  |
| C | 0.15787  | -4.37584 | -0.46142 |
| C | -0.34235 | -5.12778 | 2.17309  |
| H | 0.80859  | -3.38247 | 2.72205  |
| C | -0.59366 | -5.51745 | -0.18628 |
| H | 0.35849  | -4.07870 | -1.48637 |
| C | -0.85972 | -5.91149 | 1.13300  |
| C | -0.52887 | -5.41618 | 3.20475  |
| H | -0.97925 | -6.11204 | -1.01093 |
| C | -1.70142 | -7.13215 | 1.42263  |
| H | -1.46487 | -7.55839 | 2.40287  |
| H | -2.77070 | -6.88255 | 1.42397  |
| H | -1.55168 | -7.91059 | 0.66701  |
| C | 3.41000  | 3.83393  | -0.21825 |
| H | 2.78794  | 4.69857  | -0.40795 |
| C | 3.39616  | -3.84621 | 0.21615  |
| C | 2.77103  | -4.70862 | 0.40601  |

**Table S16** Cartesian coordinates of optimized  $S_0$  and  $S_1$  states of *PP*-TAzBN in toluene at B3LYP/6-31G(d) by DFT and TDA-DFT, respectively.

| Elements | X        | Y        | Z        | $S_0$    |          |          |
|----------|----------|----------|----------|----------|----------|----------|
|          |          |          |          | X        | Y        | Z        |
| B        | -0.15194 | 2.91632  | 0.09185  | -0.22363 | 2.96791  | 0.08943  |
| C        | -0.07488 | 1.43308  | -0.09542 | -0.11207 | 1.45854  | -0.09773 |
| C        | -1.24616 | 0.66109  | -0.25241 | -1.24604 | 0.65981  | -0.23265 |
| C        | -1.18156 | -0.71979 | -0.43286 | -1.15705 | -0.74204 | -0.43519 |
| H        | -2.08451 | -1.29544 | -0.56785 | -2.05452 | -1.32025 | -0.59666 |
| C        | 0.06736  | -1.36375 | -0.42089 | 0.09552  | -1.37538 | -0.43132 |
| N        | 0.11937  | -2.75854 | -0.56149 | 0.17733  | -2.77084 | -0.58182 |
| C        | -1.07118 | -3.50815 | -0.27981 | -0.99582 | -3.53815 | -0.27499 |
| C        | -1.35998 | -3.82194 | 1.05526  | -1.26079 | -3.85283 | 1.06493  |
| C        | -2.55479 | -4.48509 | 1.34239  | -2.44329 | -4.53037 | 1.37031  |
| C        | -3.44600 | -4.82065 | 0.32083  | -3.34587 | -4.87776 | 0.36294  |
| H        | -4.37762 | -5.32491 | 0.56109  | -4.26700 | -5.39370 | 0.61806  |
| C        | -3.13948 | -4.51454 | -1.00561 | -3.06414 | -4.56879 | -0.96831 |

|   |          |          |          |          |          |          |
|---|----------|----------|----------|----------|----------|----------|
| H | -3.82848 | -4.77950 | -1.80206 | -3.76172 | -4.84321 | -1.75390 |
| H | -2.79166 | -4.73336 | 2.37400  | -2.66084 | -4.78157 | 2.40538  |
| C | -0.33484 | -3.47474 | 2.10122  | -0.22546 | -3.49564 | 2.09759  |
| C | 0.94459  | -4.31663 | 1.94386  | 1.06362  | -4.31747 | 1.91704  |
| H | 0.66496  | -5.37613 | 2.03051  | 0.79777  | -5.38197 | 1.98228  |
| C | 1.77160  | -4.14585 | 0.67726  | 1.88113  | -4.10619 | 0.65095  |
| C | 3.03841  | -4.75247 | 0.65847  | 3.17084  | -4.66312 | 0.62611  |
| H | 3.35652  | -5.31164 | 1.53568  | 3.51199  | -5.21452 | 1.49944  |
| C | 3.90031  | -4.63638 | -0.42707 | 4.02586  | -4.50723 | -0.45962 |
| H | 4.87956  | -5.10525 | -0.39432 | 5.02261  | -4.93766 | -0.43079 |
| C | 3.50190  | -3.90885 | -1.55116 | 3.59772  | -3.78907 | -1.57905 |
| H | 4.16467  | -3.79939 | -2.40423 | 4.25383  | -3.64958 | -2.43277 |
| C | 2.24026  | -3.32786 | -1.57018 | 2.31421  | -3.25817 | -1.59293 |
| H | 1.90242  | -2.75771 | -2.42968 | 1.95274  | -2.69906 | -2.45025 |
| H | 1.60128  | -4.11074 | 2.79833  | 1.72180  | -4.12146 | 2.77241  |
| H | -0.74564 | -3.66024 | 3.09931  | -0.61965 | -3.69231 | 3.10005  |
| H | -0.08710 | -2.40786 | 2.04900  | 0.00666  | -2.42480 | 2.04976  |
| C | -1.94461 | -3.85794 | -1.30707 | -1.88185 | -3.89834 | -1.28832 |
| H | -1.68860 | -3.59397 | -2.32844 | -1.64341 | -3.63461 | -2.31406 |
| C | 1.37717  | -3.43479 | -0.47014 | 1.45685  | -3.40548 | -0.49257 |
| C | 1.24625  | -0.61998 | -0.24587 | 1.24277  | -0.59059 | -0.25457 |
| H | 2.20286  | -1.11823 | -0.20708 | 2.21494  | -1.05580 | -0.19192 |
| N | -2.50166 | 1.29387  | -0.20169 | -2.51461 | 1.24357  | -0.20078 |
| C | -3.55477 | 0.49400  | 0.36376  | -3.52730 | 0.41651  | 0.37864  |
| C | -4.70314 | 0.20146  | -0.37527 | -4.68932 | 0.09885  | -0.33539 |
| C | -5.64938 | -0.67474 | 0.16737  | -5.59551 | -0.80180 | 0.22945  |
| H | -6.54532 | -0.90146 | -0.40512 | -6.49544 | -1.05751 | -0.32386 |
| C | -5.44926 | -1.26314 | 1.41471  | -5.34980 | -1.38891 | 1.47156  |
| H | -6.18471 | -1.95635 | 1.81256  | -6.06052 | -2.09800 | 1.88551  |
| C | -4.30523 | -0.95036 | 2.15342  | -4.19027 | -1.06190 | 2.17836  |
| H | -4.14561 | -1.39276 | 3.13224  | -3.99388 | -1.50666 | 3.14909  |
| C | -4.91834 | 0.93621  | -1.66341 | -4.92235 | 0.77630  | -1.65098 |
| H | -5.80606 | 0.55212  | -2.17643 | -5.80032 | 0.34777  | -2.14518 |
| H | -4.06227 | 0.80426  | -2.33643 | -4.06298 | 0.62488  | -2.31654 |
| C | -5.11486 | 2.42808  | -1.35429 | -5.14598 | 2.27562  | -1.42694 |
| H | -5.52405 | 2.92438  | -2.24216 | -5.50971 | 2.71876  | -2.36268 |
| H | -5.88835 | 2.51223  | -0.57813 | -5.96552 | 2.39438  | -0.70346 |
| C | -3.87606 | 3.21226  | -0.93702 | -3.95021 | 3.10521  | -0.98125 |
| C | -3.96013 | 4.59323  | -1.14225 | -4.12458 | 4.49681  | -1.14307 |
| H | -4.89960 | 4.99503  | -1.51594 | -5.08518 | 4.85732  | -1.50214 |
| C | -2.88208 | 5.45249  | -0.94833 | -3.09300 | 5.39188  | -0.89033 |
| C | -1.67071 | 4.91386  | -0.54314 | -1.85350 | 4.91354  | -0.48220 |
| H | -0.80247 | 5.55861  | -0.46317 | -1.03381 | 5.61226  | -0.36261 |
| H | -2.98244 | 6.51471  | -1.15197 | -3.24667 | 6.45765  | -1.04170 |
| C | -3.36361 | -0.06913 | 1.63064  | -3.28108 | -0.16086 | 1.63371  |
| H | -2.45921 | 0.16751  | 2.18150  | -2.37334 | 0.10428  | 2.16546  |
| C | -2.65035 | 2.68282  | -0.45442 | -2.71658 | 2.64284  | -0.49114 |
| C | 1.16851  | 0.76571  | -0.10282 | 1.12608  | 0.81865  | -0.12476 |
| N | 2.35203  | 1.51268  | 0.03883  | 2.29403  | 1.56682  | 0.03477  |
| C | 3.48554  | 0.99016  | -0.67501 | 3.42470  | 1.05995  | -0.67968 |
| C | 3.36463  | 0.75552  | -2.04913 | 3.28615  | 0.79427  | -2.04983 |

|   |          |          |          |          |          |          |
|---|----------|----------|----------|----------|----------|----------|
| C | 4.40429  | 0.14932  | -2.74868 | 4.33156  | 0.20694  | -2.75608 |
| H | 4.30350  | -0.03316 | -3.81457 | 4.22183  | 0.00958  | -3.81821 |
| C | 5.57319  | -0.21770 | -2.07654 | 5.51804  | -0.11954 | -2.09456 |
| H | 6.38660  | -0.69575 | -2.61475 | 6.33658  | -0.58335 | -2.63711 |
| C | 5.69732  | 0.04169  | -0.71286 | 5.65271  | 0.15511  | -0.73292 |
| H | 6.60991  | -0.22799 | -0.18730 | 6.57362  | -0.10060 | -0.21533 |
| H | 2.44332  | 1.03119  | -2.55180 | 2.35632  | 1.05486  | -2.54453 |
| C | 4.65515  | 0.64011  | 0.00338  | 4.61126  | 0.74017  | -0.00862 |
| C | 4.78049  | 1.03917  | 1.44214  | 4.72129  | 1.09182  | 1.44320  |
| H | 3.93552  | 0.65787  | 2.02837  | 3.88093  | 0.66457  | 2.00486  |
| H | 5.69778  | 0.62547  | 1.87354  | 5.64310  | 0.67678  | 1.86357  |
| C | 4.82538  | 2.57234  | 1.52498  | 4.73004  | 2.61599  | 1.60238  |
| H | 5.16642  | 2.86471  | 2.52519  | 5.00445  | 2.85835  | 2.63706  |
| H | 5.59821  | 2.92483  | 0.82765  | 5.53985  | 3.01991  | 0.97771  |
| C | 3.51862  | 3.31362  | 1.26571  | 3.43660  | 3.36090  | 1.30323  |
| C | 3.46200  | 4.60451  | 1.80100  | 3.40990  | 4.68444  | 1.79497  |
| H | 4.35337  | 4.99093  | 2.29075  | 4.30566  | 5.07551  | 2.27079  |
| C | 2.30453  | 5.37793  | 1.78625  | 2.26416  | 5.46534  | 1.71400  |
| C | 1.15583  | 4.83982  | 1.22716  | 1.10885  | 4.93369  | 1.15343  |
| H | 0.22737  | 5.39745  | 1.28026  | 0.19890  | 5.52197  | 1.16841  |
| H | 2.29628  | 6.36342  | 2.24297  | 2.26324  | 6.47535  | 2.11693  |
| C | 2.35649  | 2.80389  | 0.62915  | 2.28801  | 2.86744  | 0.66138  |
| C | -1.52055 | 3.54285  | -0.26860 | -1.60795 | 3.53929  | -0.26168 |
| C | 1.14626  | 3.56916  | 0.62457  | 1.06335  | 3.63071  | 0.60655  |

**Table S17** Cartesian coordinates of optimized T<sub>1</sub> and T<sub>2</sub> states of *PP*-TAzBN in toluene at B3LYP/6-31G(d) by TDA-DFT.

| Elements | X        | Y              | Z        | X        | Y              | Z        |
|----------|----------|----------------|----------|----------|----------------|----------|
|          |          | T <sub>1</sub> |          |          | T <sub>2</sub> |          |
| B        | -0.23848 | 2.96030        | 0.09159  | -0.45877 | 2.93901        | 0.07696  |
| C        | -0.12147 | 1.46473        | -0.09527 | -0.23634 | 1.42602        | 0.01371  |
| C        | -1.25249 | 0.65294        | -0.23862 | -1.33293 | 0.52622        | -0.11353 |
| C        | -1.15568 | -0.74014       | -0.44335 | -1.13032 | -0.84233       | -0.20202 |
| H        | -2.05037 | -1.32528       | -0.59824 | -1.97387 | -1.50765       | -0.31657 |
| C        | 0.09872  | -1.37052       | -0.43607 | 0.19095  | -1.36350       | -0.12929 |
| N        | 0.18557  | -2.77018       | -0.59186 | 0.41284  | -2.73148       | -0.23977 |
| C        | -0.97972 | -3.53886       | -0.26054 | -0.67668 | -3.66596       | -0.20027 |
| C        | -1.22879 | -3.84326       | 1.08498  | -0.84091 | -4.42085       | 0.96568  |
| C        | -2.40650 | -4.51968       | 1.41060  | -1.89729 | -5.33355       | 1.01825  |
| C        | -3.32123 | -4.87667       | 0.41759  | -2.76877 | -5.47848       | -0.06222 |
| H        | -4.23859 | -5.39136       | 0.68848  | -3.59100 | -6.18512       | -0.00116 |
| C        | -3.05594 | -4.57874       | -0.91944 | -2.58331 | -4.72205       | -1.22088 |
| H        | -3.76269 | -4.86047       | -1.69424 | -3.25526 | -4.83826       | -2.06548 |
| H        | -2.61074 | -4.76264       | 2.45042  | -2.03899 | -5.92926       | 1.91606  |
| C        | -0.18076 | -3.47840       | 2.10175  | 0.17568  | -4.26147       | 2.06283  |
| C        | 1.10546  | -4.30156       | 1.90846  | 1.53382  | -4.85553       | 1.65118  |
| H        | 0.83927  | -5.36585       | 1.97688  | 1.39284  | -5.92825       | 1.46058  |
| C        | 1.90951  | -4.08936       | 0.63398  | 2.24403  | -4.25328       | 0.44755  |

|   |          |          |          |          |          |          |
|---|----------|----------|----------|----------|----------|----------|
| C | 3.20318  | -4.63663 | 0.60032  | 3.54455  | -4.70992 | 0.18566  |
| H | 3.55526  | -5.18326 | 1.47239  | 3.96300  | -5.47078 | 0.84012  |
| C | 4.04908  | -4.47632 | -0.49184 | 4.31671  | -4.20480 | -0.85589 |
| H | 5.04932  | -4.89909 | -0.46979 | 5.32502  | -4.57601 | -1.01209 |
| C | 3.60690  | -3.76268 | -1.60874 | 3.79006  | -3.21520 | -1.69031 |
| H | 4.25560  | -3.61912 | -2.46750 | 4.37820  | -2.79954 | -2.50204 |
| C | 2.31920  | -3.24220 | -1.61383 | 2.49875  | -2.75951 | -1.47217 |
| H | 1.94682  | -2.68736 | -2.46930 | 2.06871  | -1.99701 | -2.11179 |
| H | 1.77289  | -4.10587 | 2.75673  | 2.21664  | -4.79063 | 2.50737  |
| H | -0.56164 | -3.66844 | 3.11067  | -0.16541 | -4.77358 | 2.96791  |
| H | 0.05072  | -2.40797 | 2.04275  | 0.29475  | -3.20139 | 2.31598  |
| C | -1.87836 | -3.90964 | -1.25918 | -1.52703 | -3.81436 | -1.29523 |
| H | -1.65274 | -3.65416 | -2.28992 | -1.36052 | -3.21732 | -2.18599 |
| C | 1.46941  | -3.39474 | -0.50783 | 1.72638  | -3.26277 | -0.40979 |
| C | 1.24174  | -0.58061 | -0.25212 | 1.28857  | -0.48684 | 0.06985  |
| H | 2.21620  | -1.04323 | -0.19886 | 2.28747  | -0.88126 | 0.18219  |
| N | -2.52861 | 1.23534  | -0.20031 | -2.62676 | 1.06924  | -0.12713 |
| C | -3.54357 | 0.39674  | 0.36741  | -3.63289 | 0.31008  | 0.54641  |
| C | -4.68812 | 0.06412  | -0.36423 | -4.75431 | -0.14810 | -0.15311 |
| C | -5.59215 | -0.84787 | 0.18757  | -5.70309 | -0.92139 | 0.52414  |
| H | -6.48079 | -1.11453 | -0.37858 | -6.58007 | -1.27166 | -0.01485 |
| C | -5.35862 | -1.42732 | 1.43475  | -5.52906 | -1.25426 | 1.86658  |
| H | -6.06568 | -2.14552 | 1.83920  | -6.27033 | -1.86364 | 2.37564  |
| C | -4.21672 | -1.08068 | 2.16046  | -4.40028 | -0.79925 | 2.55445  |
| H | -4.03032 | -1.52013 | 3.13551  | -4.26182 | -1.04497 | 3.60342  |
| C | -4.91821 | 0.75435  | -1.67393 | -4.91791 | 0.28398  | -1.57978 |
| H | -5.78780 | 0.32325  | -2.18038 | -5.74618 | -0.25858 | -2.04812 |
| H | -4.05283 | 0.62404  | -2.33590 | -4.00866 | 0.05780  | -2.15081 |
| C | -5.16212 | 2.24727  | -1.42522 | -5.20337 | 1.78944  | -1.64235 |
| H | -5.53617 | 2.70110  | -2.35118 | -5.48354 | 2.05277  | -2.67094 |
| H | -5.97842 | 2.34214  | -0.69495 | -6.09494 | 1.99095  | -1.03104 |
| C | -3.97482 | 3.08636  | -0.97163 | -4.08526 | 2.73656  | -1.22942 |
| C | -4.15442 | 4.47227  | -1.12863 | -4.31418 | 4.09084  | -1.57338 |
| H | -5.11313 | 4.83199  | -1.49301 | -5.26716 | 4.34954  | -2.02918 |
| C | -3.12325 | 5.37244  | -0.87071 | -3.35095 | 5.06944  | -1.37377 |
| C | -1.88212 | 4.90164  | -0.46763 | -2.12163 | 4.71022  | -0.83113 |
| H | -1.06722 | 5.60585  | -0.34793 | -1.34034 | 5.45760  | -0.74089 |
| H | -3.28280 | 6.43766  | -1.02009 | -3.54622 | 6.09814  | -1.66615 |
| C | -3.30982 | -0.16981 | 1.62747  | -3.45584 | -0.01661 | 1.89597  |
| H | -2.41129 | 0.10459  | 2.16991  | -2.57373 | 0.34678  | 2.41387  |
| C | -2.73461 | 2.62557  | -0.48254 | -2.87591 | 2.40714  | -0.60040 |
| C | 1.12146  | 0.82068  | -0.12068 | 1.07683  | 0.88014  | 0.08943  |
| N | 2.29035  | 1.58023  | 0.03402  | 2.15789  | 1.77102  | 0.14967  |
| C | 3.42869  | 1.07227  | -0.67422 | 3.32708  | 1.36338  | -0.56599 |
| C | 3.30189  | 0.82255  | -2.04660 | 3.22029  | 1.06653  | -1.93052 |
| C | 4.35169  | 0.23502  | -2.74686 | 4.32630  | 0.59450  | -2.63178 |
| H | 4.25217  | 0.04770  | -3.81176 | 4.24025  | 0.37417  | -3.69203 |
| C | 5.52748  | -0.10819 | -2.07501 | 5.54679  | 0.42165  | -1.97138 |
| H | 6.34796  | -0.57395 | -2.61295 | 6.41416  | 0.05475  | -2.51269 |
| C | 5.64968  | 0.15286  | -0.71023 | 5.65001  | 0.72976  | -0.61594 |
| H | 6.56385  | -0.11140 | -0.18516 | 6.59763  | 0.60074  | -0.09883 |

|   |          |         |          |          |         |          |
|---|----------|---------|----------|----------|---------|----------|
| H | 2.37704  | 1.08913 | -2.54720 | 2.26438  | 1.20620 | -2.42552 |
| C | 4.60395  | 0.74036 | 0.00716  | 4.54285  | 1.19299 | 0.10354  |
| C | 4.70721  | 1.10115 | 1.45745  | 4.61134  | 1.58556 | 1.54933  |
| H | 3.86243  | 0.68414 | 2.01989  | 3.81799  | 1.08285 | 2.11672  |
| H | 5.62522  | 0.68651 | 1.88619  | 5.57035  | 1.27845 | 1.97995  |
| C | 4.72337  | 2.62770 | 1.59784  | 4.45979  | 3.10554 | 1.68965  |
| H | 5.00402  | 2.88292 | 2.62722  | 4.69366  | 3.38800 | 2.72445  |
| H | 5.53015  | 3.01983 | 0.96228  | 5.23283  | 3.58265 | 1.06988  |
| C | 3.43046  | 3.37430 | 1.29617  | 3.10322  | 3.71196 | 1.35983  |
| C | 3.39865  | 4.69280 | 1.78562  | 2.93714  | 5.04621 | 1.80407  |
| H | 4.28958  | 5.08792 | 2.26678  | 3.78531  | 5.53969 | 2.27286  |
| C | 2.24623  | 5.46992 | 1.70371  | 1.72606  | 5.71020 | 1.68310  |
| C | 1.09218  | 4.93505 | 1.14892  | 0.64018  | 5.04652 | 1.11816  |
| H | 0.18111  | 5.52143 | 1.16699  | -0.32584 | 5.53933 | 1.08499  |
| H | 2.24253  | 6.47966 | 2.10734  | 1.61989  | 6.72765 | 2.05101  |
| C | 2.27894  | 2.87323 | 0.65469  | 2.02409  | 3.08937 | 0.71534  |
| C | -1.62587 | 3.52803 | -0.25438 | -1.84119 | 3.38726 | -0.41743 |
| C | 1.04736  | 3.63126 | 0.60519  | 0.74578  | 3.73357 | 0.60810  |

**Table S18** Cartesian coordinates of optimized T<sub>3</sub> state of *PP*-TAzBN in toluene at B3LYP/6-31G(d) by TDA-DFT.

| Elements | X        | Y        | Z        |
|----------|----------|----------|----------|
| B        | -0.04182 | 2.97739  | 0.06492  |
| C        | -0.01668 | 1.49422  | -0.10210 |
| C        | -1.20899 | 0.78198  | -0.28378 |
| C        | -1.19143 | -0.65826 | -0.48845 |
| H        | -2.09727 | -1.17522 | -0.76465 |
| C        | 0.02649  | -1.34897 | -0.40893 |
| N        | 0.03148  | -2.74549 | -0.55851 |
| C        | -1.19938 | -3.45118 | -0.34816 |
| C        | -1.57971 | -3.75485 | 0.96586  |
| C        | -2.80585 | -4.38938 | 1.17717  |
| C        | -3.63884 | -4.70418 | 0.10146  |
| H        | -4.59530 | -5.18629 | 0.28264  |
| C        | -3.24402 | -4.40466 | -1.20278 |
| H        | -3.88821 | -4.65334 | -2.04093 |
| H        | -3.11290 | -4.63114 | 2.19167  |
| C        | -0.60960 | -3.44107 | 2.07267  |
| C        | 0.64637  | -4.32823 | 1.99315  |
| H        | 0.32382  | -5.37724 | 2.05593  |
| C        | 1.55838  | -4.18164 | 0.78288  |
| C        | 2.80699  | -4.82277 | 0.84556  |
| H        | 3.05237  | -5.39064 | 1.74038  |
| C        | 3.74107  | -4.72734 | -0.18139 |
| H        | 4.70383  | -5.22129 | -0.08554 |
| C        | 3.43710  | -3.98801 | -1.32663 |
| H        | 4.15850  | -3.89070 | -2.13188 |
| C        | 2.19428  | -3.37440 | -1.42810 |

|   |          |          |          |
|---|----------|----------|----------|
| H | 1.93042  | -2.79214 | -2.30437 |
| H | 1.25391  | -4.14915 | 2.88906  |
| H | -1.08728 | -3.60978 | 3.04379  |
| H | -0.32095 | -2.38383 | 2.03594  |
| C | -2.01621 | -3.77753 | -1.42823 |
| H | -1.68810 | -3.52363 | -2.43141 |
| C | 1.25865  | -3.46088 | -0.38690 |
| C | 1.22037  | -0.65785 | -0.16457 |
| H | 2.13701  | -1.19296 | 0.02593  |
| N | -2.44909 | 1.41542  | -0.20422 |
| C | -3.47632 | 0.59750  | 0.37525  |
| C | -4.69362 | 0.36754  | -0.28541 |
| C | -5.56828 | -0.58674 | 0.22921  |
| H | -6.51182 | -0.76195 | -0.28145 |
| C | -5.24433 | -1.32725 | 1.37555  |
| H | -5.93106 | -2.08215 | 1.74612  |
| C | -4.03616 | -1.08971 | 2.03024  |
| H | -3.77461 | -1.65286 | 2.92112  |
| C | -5.03266 | 1.21792  | -1.47059 |
| H | -5.98808 | 0.90031  | -1.90017 |
| H | -4.27020 | 1.12157  | -2.25459 |
| C | -5.13399 | 2.68222  | -1.02231 |
| H | -5.66919 | 3.25560  | -1.78739 |
| H | -5.76242 | 2.71825  | -0.12155 |
| C | -3.82106 | 3.40393  | -0.76011 |
| C | -3.86061 | 4.78508  | -0.96489 |
| H | -4.80856 | 5.22780  | -1.26114 |
| C | -2.73368 | 5.59875  | -0.85669 |
| C | -1.52257 | 5.01402  | -0.52895 |
| H | -0.62928 | 5.62722  | -0.49898 |
| H | -2.80490 | 6.66384  | -1.05711 |
| C | -3.14972 | -0.13896 | 1.53360  |
| H | -2.20737 | 0.05742  | 2.03298  |
| C | -2.57766 | 2.81662  | -0.39958 |
| C | 1.19555  | 0.79419  | -0.06462 |
| N | 2.41494  | 1.46427  | 0.03568  |
| C | 3.48836  | 0.82052  | -0.66658 |
| C | 3.22928  | 0.34951  | -1.97041 |
| C | 4.17305  | -0.42991 | -2.63314 |
| H | 3.96829  | -0.77738 | -3.64185 |
| C | 5.37057  | -0.76631 | -2.00084 |
| H | 6.10499  | -1.38578 | -2.50676 |
| C | 5.62330  | -0.29597 | -0.70401 |
| H | 6.55644  | -0.54904 | -0.20720 |
| H | 2.29525  | 0.61994  | -2.45062 |
| C | 4.69267  | 0.48687  | -0.02515 |
| C | 4.96157  | 1.06468  | 1.32955  |
| H | 4.17458  | 0.78287  | 2.04114  |
| H | 5.91054  | 0.68368  | 1.72000  |
| C | 5.03183  | 2.59304  | 1.21093  |
| H | 5.51994  | 3.00064  | 2.10324  |



|   |          |         |          |
|---|----------|---------|----------|
| H | 5.69080  | 2.83777 | 0.36633  |
| C | 3.70538  | 3.32111 | 1.05565  |
| C | 3.69605  | 4.62830 | 1.54805  |
| H | 4.62176  | 5.02167 | 1.96126  |
| C | 2.54772  | 5.41771 | 1.57902  |
| C | 1.36355  | 4.88251 | 1.10230  |
| H | 0.45150  | 5.46302 | 1.17869  |
| H | 2.58053  | 6.41808 | 2.00068  |
| C | 2.49173  | 2.79219 | 0.53694  |
| C | -1.40275 | 3.63528 | -0.27218 |
| C | 1.29395  | 3.58710 | 0.55635  |

**Table S19** Cartesian coordinates of optimized  $S_0$  and  $S_1$  states of TTABN as the QM layer in the solid phase at B3LYP/6-31G(d).

| Elements | X        | Y        | Z        | S <sub>0</sub> |          |          | S <sub>1</sub> |   |   |
|----------|----------|----------|----------|----------------|----------|----------|----------------|---|---|
|          |          |          |          | X              | Y        | Z        | X              | Y | Z |
| B        | 5.47148  | 2.99372  | 1.85444  | 5.43750        | 2.98427  | 1.84806  |                |   |   |
| C        | 4.91536  | 1.56312  | 1.59869  | 4.89791        | 1.56464  | 1.59259  |                |   |   |
| C        | 3.66306  | 1.25602  | 1.02307  | 3.64645        | 1.23237  | 1.01657  |                |   |   |
| C        | 3.12458  | -0.02713 | 0.95448  | 3.12038        | -0.06585 | 0.97795  |                |   |   |
| C        | 1.75877  | -0.27126 | 0.35497  | 1.75072        | -0.31423 | 0.39353  |                |   |   |
| H        | 1.53147  | -1.34064 | 0.29780  | 1.52566        | -1.38327 | 0.32709  |                |   |   |
| H        | 0.96760  | 0.19901  | 0.95347  | 0.96680        | 0.15191  | 1.00537  |                |   |   |
| H        | 1.68119  | 0.13977  | -0.65947 | 1.66226        | 0.11199  | -0.61409 |                |   |   |
| C        | 3.88320  | -1.06920 | 1.50702  | 3.87390        | -1.10292 | 1.53556  |                |   |   |
| H        | 3.48390  | -2.08143 | 1.52186  | 3.47748        | -2.11447 | 1.57151  |                |   |   |
| C        | 5.15051  | -0.84268 | 2.02143  | 5.15620        | -0.85148 | 2.04069  |                |   |   |
| H        | 5.71420  | -1.67831 | 2.41641  | 5.72759        | -1.67515 | 2.44918  |                |   |   |
| H        | 3.08254  | 2.06696  | 0.59681  | 3.05772        | 2.02955  | 0.57513  |                |   |   |
| C        | 5.70589  | 0.45476  | 2.02091  | 5.69111        | 0.44313  | 2.01221  |                |   |   |
| N        | 7.03949  | 0.63038  | 2.43562  | 7.04803        | 0.63615  | 2.40383  |                |   |   |
| C        | 7.84389  | -0.52413 | 2.73406  | 7.85058        | -0.51467 | 2.71544  |                |   |   |
| C        | 8.30267  | -0.75724 | 4.02907  | 8.34003        | -0.71326 | 4.00741  |                |   |   |
| H        | 7.98909  | -0.10626 | 4.83919  | 8.04310        | -0.04351 | 4.80826  |                |   |   |
| C        | 9.20706  | -1.79220 | 4.26202  | 9.24295        | -1.74961 | 4.24771  |                |   |   |
| H        | 9.59883  | -1.93134 | 5.26033  | 9.65217        | -1.86804 | 5.24253  |                |   |   |
| C        | 9.65789  | -2.62616 | 3.23446  | 9.66468        | -2.61143 | 3.23256  |                |   |   |
| C        | 9.15146  | -2.40654 | 1.94713  | 9.12628        | -2.42413 | 1.94949  |                |   |   |
| H        | 9.46040  | -3.03851 | 1.12004  | 9.41400        | -3.07974 | 1.13329  |                |   |   |
| C        | 10.66728 | -3.71431 | 3.50190  | 10.67392       | -3.69871 | 3.50094  |                |   |   |
| H        | 10.22348 | -4.71485 | 3.41624  | 10.23181       | -4.69923 | 3.40669  |                |   |   |
| H        | 11.08907 | -3.61934 | 4.50556  | 11.09009       | -3.60860 | 4.50735  |                |   |   |
| H        | 11.50197 | -3.66270 | 2.79459  | 11.51232       | -3.64325 | 2.79755  |                |   |   |
| C        | 8.25904  | -1.36990 | 1.70411  | 8.22565        | -1.39799 | 1.69946  |                |   |   |
| H        | 7.86987  | -1.20260 | 0.71306  | 7.80397        | -1.26367 | 0.71644  |                |   |   |
| C        | 7.69678  | 1.87221  | 2.42048  | 7.68029        | 1.87952  | 2.41136  |                |   |   |
| C        | 9.08573  | 1.92116  | 2.58368  | 9.09648        | 1.92439  | 2.55883  |                |   |   |
| H        | 9.66851  | 1.01563  | 2.62930  | 9.67447        | 1.01371  | 2.55311  |                |   |   |

|   |          |          |          |          |          |          |
|---|----------|----------|----------|----------|----------|----------|
| C | 9.74050  | 3.15844  | 2.65338  | 9.76361  | 3.15395  | 2.66328  |
| C | 9.00763  | 4.35031  | 2.57097  | 9.01181  | 4.33207  | 2.59886  |
| C | 7.62040  | 4.29959  | 2.37088  | 7.60215  | 4.27495  | 2.38347  |
| N | 6.88712  | 5.49400  | 2.31027  | 6.88585  | 5.46490  | 2.32469  |
| C | 5.50917  | 5.55023  | 2.01946  | 5.49127  | 5.54254  | 2.01745  |
| C | 4.88066  | 6.80972  | 1.94393  | 4.89250  | 6.80424  | 1.94590  |
| C | 3.52427  | 6.90603  | 1.67670  | 3.52562  | 6.92759  | 1.66700  |
| C | 2.72140  | 5.76904  | 1.52467  | 2.72472  | 5.79601  | 1.51228  |
| C | 1.24108  | 5.87659  | 1.24636  | 1.24848  | 5.91387  | 1.22494  |
| H | 0.64252  | 5.52872  | 2.09744  | 0.64636  | 5.53474  | 2.06058  |
| H | 0.94775  | 5.26951  | 0.38120  | 0.96488  | 5.32864  | 0.34119  |
| H | 0.95381  | 6.91201  | 1.03520  | 0.96048  | 6.95446  | 1.04344  |
| C | 3.35570  | 4.53318  | 1.60945  | 3.33535  | 4.53995  | 1.60165  |
| H | 2.74022  | 3.64746  | 1.50779  | 2.70445  | 3.66432  | 1.50126  |
| H | 3.08094  | 7.89139  | 1.57838  | 3.09608  | 7.91711  | 1.56350  |
| H | 5.45373  | 7.71802  | 2.08099  | 5.47588  | 7.70391  | 2.09482  |
| C | 7.56843  | 6.70853  | 2.68861  | 7.56731  | 6.68199  | 2.70197  |
| C | 7.68614  | 7.06755  | 4.03386  | 7.68748  | 7.04262  | 4.04596  |
| H | 7.24689  | 6.43618  | 4.79782  | 7.24937  | 6.41420  | 4.81262  |
| C | 8.38770  | 8.21901  | 4.39261  | 8.38910  | 8.19647  | 4.39917  |
| H | 8.47382  | 8.48301  | 5.44455  | 8.48014  | 8.46123  | 5.45040  |
| C | 8.99252  | 9.03156  | 3.42456  | 8.98638  | 9.00945  | 3.42715  |
| C | 8.86916  | 8.65544  | 2.08035  | 8.85601  | 8.63200  | 2.08345  |
| H | 9.32953  | 9.26606  | 1.30756  | 9.31078  | 9.24292  | 1.30756  |
| C | 9.73755  | 10.28913 | 3.80435  | 9.72997  | 10.26943 | 3.80202  |
| H | 9.10839  | 11.17929 | 3.67062  | 9.09870  | 11.15757 | 3.66538  |
| H | 10.06146 | 10.26649 | 4.84959  | 10.05383 | 10.25125 | 4.84732  |
| H | 10.62539 | 10.42556 | 3.17888  | 10.61739 | 10.40582 | 3.17574  |
| C | 8.15697  | 7.51509  | 1.71561  | 8.14306  | 7.49075  | 1.72253  |
| H | 8.04732  | 7.23267  | 0.67643  | 8.02504  | 7.20999  | 0.68374  |
| H | 9.52146  | 5.29440  | 2.67271  | 9.51366  | 5.28400  | 2.69035  |
| N | 11.14199 | 3.19474  | 2.82134  | 11.16419 | 3.18632  | 2.82108  |
| C | 11.84118 | 2.06798  | 3.35256  | 11.85804 | 2.05841  | 3.35604  |
| C | 11.45347 | 1.48477  | 4.56921  | 11.46501 | 1.47701  | 4.57169  |
| H | 10.61734 | 1.90479  | 5.11962  | 10.63328 | 1.90303  | 5.12484  |
| C | 12.12352 | 0.36694  | 5.05623  | 12.13103 | 0.35726  | 5.06048  |
| H | 11.80273 | -0.07674 | 5.99399  | 11.80956 | -0.08294 | 5.99942  |
| C | 13.21298 | -0.19334 | 4.37544  | 13.22004 | -0.20659 | 4.38158  |
| C | 13.93374 | -1.40210 | 4.92784  | 13.93801 | -1.41518 | 4.93711  |
| H | 13.29304 | -2.29352 | 4.92500  | 13.29947 | -2.30803 | 4.92506  |
| H | 14.82553 | -1.63626 | 4.33861  | 14.83616 | -1.64508 | 4.35618  |
| H | 14.25337 | -1.24076 | 5.96479  | 14.24662 | -1.25570 | 5.97753  |
| C | 13.60646 | 0.41320  | 3.17719  | 13.61600 | 0.39670  | 3.18236  |
| H | 14.45879 | 0.01389  | 2.63232  | 14.46740 | -0.00625 | 2.63893  |
| C | 12.93360 | 1.52219  | 2.66621  | 12.94809 | 1.50741  | 2.66928  |
| H | 13.25403 | 1.96981  | 1.73073  | 13.27108 | 1.95358  | 1.73401  |
| C | 11.93335 | 4.30051  | 2.38325  | 11.95128 | 4.29429  | 2.37984  |
| C | 11.86859 | 4.79615  | 1.07291  | 11.88430 | 4.78763  | 1.06882  |
| H | 11.15785 | 4.38164  | 0.36903  | 11.18086 | 4.36608  | 0.36148  |
| C | 12.71895 | 5.82155  | 0.67058  | 12.72820 | 5.81849  | 0.66703  |
| H | 12.66952 | 6.17095  | -0.35599 | 12.67778 | 6.16633  | -0.35986 |

|   |          |         |         |          |         |         |
|---|----------|---------|---------|----------|---------|---------|
| C | 13.65264 | 6.39114 | 1.54587 | 13.65796 | 6.39393 | 1.54314 |
| C | 13.69044 | 5.90906 | 2.85779 | 13.69637 | 5.91425 | 2.85607 |
| H | 14.38580 | 6.35228 | 3.56683 | 14.38851 | 6.36167 | 3.56551 |
| C | 14.59885 | 7.46763 | 1.07855 | 14.59957 | 7.47370 | 1.07501 |
| H | 14.07857 | 8.26143 | 0.53462 | 14.07561 | 8.26661 | 0.53363 |
| H | 15.13166 | 7.92604 | 1.91735 | 15.13358 | 7.93220 | 1.91284 |
| H | 15.35092 | 7.06082 | 0.39402 | 15.35015 | 7.06940 | 0.38747 |
| C | 12.84630 | 4.88074 | 3.27098 | 12.85678 | 4.88262 | 3.26982 |
| H | 12.87442 | 4.51585 | 4.29142 | 12.88309 | 4.52017 | 4.29112 |
| C | 4.74333  | 4.36420 | 1.80675 | 4.72420  | 4.34552 | 1.80264 |
| C | 6.93380  | 3.05807 | 2.23762 | 6.92422  | 3.04882 | 2.23356 |

**Table S20** Cartesian coordinates of optimized T<sub>1</sub> and T<sub>2</sub> states of TTABN as the QM layer in the solid phase at B3LYP/6-31G(d) by TDA-DFT.

| Elements | X        | Y              | Z        | X        | Y              | Z        |
|----------|----------|----------------|----------|----------|----------------|----------|
|          |          | T <sub>1</sub> |          |          | T <sub>2</sub> |          |
| B        | 5.44309  | 2.98642        | 1.85340  | 5.47328  | 3.00161        | 1.83958  |
| C        | 4.89421  | 1.56640        | 1.60170  | 4.92253  | 1.57590        | 1.57602  |
| C        | 3.64413  | 1.23527        | 1.02756  | 3.67525  | 1.26851        | 0.98606  |
| C        | 3.11976  | -0.06340       | 0.98063  | 3.12554  | -0.02047       | 0.92888  |
| C        | 1.74932  | -0.30818       | 0.39793  | 1.75991  | -0.24899       | 0.32438  |
| H        | 1.52430  | -1.37653       | 0.32301  | 1.50340  | -1.31336       | 0.30270  |
| H        | 0.96818  | 0.15295        | 1.01686  | 0.97709  | 0.26646        | 0.89647  |
| H        | 1.65830  | 0.12779        | -0.60506 | 1.70356  | 0.12884        | -0.70493 |
| C        | 3.87478  | -1.10754       | 1.52749  | 3.86433  | -1.06079       | 1.48643  |
| H        | 3.47825  | -2.11909       | 1.55414  | 3.46138  | -2.07114       | 1.50805  |
| C        | 5.15549  | -0.85952       | 2.02772  | 5.14309  | -0.82987       | 2.01125  |
| H        | 5.73180  | -1.68568       | 2.42367  | 5.69769  | -1.66654       | 2.41791  |
| H        | 3.04986  | 2.03321        | 0.59585  | 3.10560  | 2.07816        | 0.54240  |
| C        | 5.69278  | 0.43954        | 2.01093  | 5.69554  | 0.45626        | 2.00999  |
| N        | 7.03864  | 0.62836        | 2.39901  | 7.03349  | 0.63596        | 2.46354  |
| C        | 7.84513  | -0.52110       | 2.71400  | 7.83645  | -0.51821       | 2.74519  |
| C        | 8.31922  | -0.72618       | 4.00884  | 8.30448  | -0.76095       | 4.03606  |
| H        | 8.01454  | -0.05983       | 4.80955  | 7.98926  | -0.11785       | 4.85213  |
| C        | 9.22052  | -1.76164       | 4.25330  | 9.20769  | -1.79920       | 4.25981  |
| H        | 9.61961  | -1.88407       | 5.25130  | 9.59754  | -1.95000       | 5.25754  |
| C        | 9.65757  | -2.61617       | 3.23712  | 9.65264  | -2.62875       | 3.22628  |
| C        | 9.13625  | -2.42085       | 1.95070  | 9.14044  | -2.40050       | 1.94240  |
| H        | 9.43420  | -3.07028       | 1.13337  | 9.44272  | -3.03100       | 1.11119  |
| C        | 10.66593 | -3.70304       | 3.51209  | 10.65753 | -3.72346       | 3.48507  |
| H        | 10.21943 | -4.70303       | 3.43572  | 10.21403 | -4.72201       | 3.37822  |
| H        | 11.09068 | -3.60010       | 4.51360  | 11.06819 | -3.64738       | 4.49517  |
| H        | 11.49835 | -3.65944       | 2.80148  | 11.50059 | -3.66258       | 2.78794  |
| C        | 8.23854  | -1.39265       | 1.69637  | 8.24674  | -1.36239       | 1.70955  |
| H        | 7.83047  | -1.25084       | 0.70910  | 7.84687  | -1.19439       | 0.72269  |
| C        | 7.68437  | 1.87980        | 2.39998  | 7.71406  | 1.86708        | 2.42176  |
| C        | 9.08716  | 1.92488        | 2.54488  | 9.09856  | 1.91219        | 2.54069  |
| H        | 9.66531  | 1.01371        | 2.55953  | 9.68474  | 1.00632        | 2.53777  |

|   |          |          |          |          |          |          |
|---|----------|----------|----------|----------|----------|----------|
| C | 9.75692  | 3.15346  | 2.65296  | 9.76056  | 3.16284  | 2.61976  |
| C | 8.99852  | 4.33229  | 2.60045  | 9.01860  | 4.37139  | 2.56540  |
| C | 7.60150  | 4.27717  | 2.38867  | 7.64003  | 4.32287  | 2.37903  |
| N | 6.87454  | 5.47646  | 2.33389  | 6.88626  | 5.50681  | 2.34300  |
| C | 5.49332  | 5.54967  | 2.02185  | 5.49750  | 5.56239  | 2.02899  |
| C | 4.88822  | 6.81341  | 1.94559  | 4.87607  | 6.81161  | 1.94394  |
| C | 3.52592  | 6.93395  | 1.66676  | 3.50675  | 6.91166  | 1.66727  |
| C | 2.72700  | 5.79737  | 1.51372  | 2.71667  | 5.77598  | 1.51901  |
| C | 1.25073  | 5.91285  | 1.22774  | 1.23758  | 5.87149  | 1.23126  |
| H | 0.65166  | 5.53850  | 2.06755  | 0.63635  | 5.50592  | 2.07353  |
| H | 0.96689  | 5.32054  | 0.34905  | 0.95707  | 5.27029  | 0.35726  |
| H | 0.96105  | 6.95171  | 1.03988  | 0.94064  | 6.90635  | 1.03003  |
| C | 3.33873  | 4.54295  | 1.60346  | 3.35354  | 4.53338  | 1.61364  |
| H | 2.70740  | 3.66825  | 1.50046  | 2.73932  | 3.64602  | 1.51609  |
| H | 3.09294  | 7.92143  | 1.56091  | 3.06583  | 7.89680  | 1.56090  |
| H | 5.47200  | 7.71306  | 2.09304  | 5.44597  | 7.72215  | 2.08245  |
| C | 7.56138  | 6.69131  | 2.70950  | 7.56361  | 6.71896  | 2.71698  |
| C | 7.68370  | 7.05245  | 4.05295  | 7.68548  | 7.08675  | 4.06015  |
| H | 7.24525  | 6.42556  | 4.82062  | 7.24088  | 6.46294  | 4.82729  |
| C | 8.38783  | 8.20492  | 4.40437  | 8.39117  | 8.23799  | 4.41292  |
| H | 8.47864  | 8.47135  | 5.45517  | 8.47613  | 8.50932  | 5.46329  |
| C | 8.98806  | 9.01469  | 3.43147  | 8.99736  | 9.04396  | 3.44031  |
| C | 8.85830  | 8.63468  | 2.08858  | 8.87264  | 8.66075  | 2.09817  |
| H | 9.31549  | 9.24270  | 1.31188  | 9.33171  | 9.26836  | 1.32182  |
| C | 9.73475  | 10.27334 | 3.80440  | 9.74189  | 10.30418 | 3.81232  |
| H | 9.10549  | 11.16284 | 3.66727  | 9.10813  | 11.19195 | 3.68494  |
| H | 10.05959 | 10.25542 | 4.84937  | 10.07672 | 10.28352 | 4.85430  |
| H | 10.62190 | 10.40657 | 3.17720  | 10.62252 | 10.44471 | 3.17743  |
| C | 8.14356  | 7.49443  | 1.72930  | 8.15690  | 7.52046  | 1.74026  |
| H | 8.02763  | 7.21131  | 0.69084  | 8.04399  | 7.23411  | 0.70199  |
| H | 9.50090  | 5.28324  | 2.70562  | 9.53189  | 5.31232  | 2.69959  |
| N | 11.16125 | 3.19085  | 2.82152  | 11.15700 | 3.19702  | 2.77758  |
| C | 11.85279 | 2.06706  | 3.36195  | 11.84735 | 2.10091  | 3.35439  |
| C | 11.45180 | 1.47830  | 4.57227  | 11.38884 | 1.48686  | 4.53558  |
| H | 10.61427 | 1.90001  | 5.11999  | 10.52271 | 1.89299  | 5.04680  |
| C | 12.11689 | 0.35849  | 5.06187  | 12.05322 | 0.37702  | 5.03854  |
| H | 11.79001 | -0.08495 | 5.99752  | 11.69819 | -0.08158 | 5.95539  |
| C | 13.21104 | -0.20280 | 4.38879  | 13.17425 | -0.17076 | 4.39213  |
| C | 13.92832 | -1.41136 | 4.94564  | 13.87215 | -1.38546 | 4.95447  |
| H | 13.28807 | -2.30316 | 4.94183  | 13.21336 | -2.26311 | 4.95613  |
| H | 14.82258 | -1.64632 | 4.36048  | 14.76272 | -1.63971 | 4.37220  |
| H | 14.24424 | -1.24855 | 5.98350  | 14.18741 | -1.22006 | 5.99219  |
| C | 13.61286 | 0.40439  | 3.19342  | 13.61785 | 0.45211  | 3.21530  |
| H | 14.46594 | 0.00225  | 2.65161  | 14.47991 | 0.04862  | 2.68977  |
| C | 12.94806 | 1.51680  | 2.68095  | 12.98157 | 1.57632  | 2.70549  |
| H | 13.27568 | 1.96498  | 1.74819  | 13.33254 | 2.03609  | 1.78758  |
| C | 11.94813 | 4.29230  | 2.37188  | 11.94559 | 4.29053  | 2.33295  |
| C | 11.87209 | 4.79335  | 1.06377  | 11.82510 | 4.83145  | 1.04192  |
| H | 11.16094 | 4.37782  | 0.36056  | 11.08593 | 4.44114  | 0.35456  |
| C | 12.71713 | 5.82269  | 0.65987  | 12.68330 | 5.84804  | 0.64287  |
| H | 12.66134 | 6.17365  | -0.36569 | 12.61651 | 6.22187  | -0.37252 |

|   |          |         |         |          |         |         |
|---|----------|---------|---------|----------|---------|---------|
| C | 13.65495 | 6.39311 | 1.53057 | 13.64802 | 6.38760 | 1.50829 |
| C | 13.70129 | 5.90825 | 2.84146 | 13.72113 | 5.87398 | 2.80935 |
| H | 14.39849 | 6.35254 | 3.54814 | 14.43223 | 6.30363 | 3.51012 |
| C | 14.59583 | 7.47295 | 1.06094 | 14.58713 | 7.46900 | 1.04436 |
| H | 14.07304 | 8.26092 | 0.51126 | 14.06298 | 8.25469 | 0.49391 |
| H | 15.12302 | 7.93864 | 1.89932 | 15.11215 | 7.93359 | 1.88422 |
| H | 15.35297 | 7.06773 | 0.38108 | 15.34534 | 7.06431 | 0.36537 |
| C | 12.86221 | 4.87757 | 3.25698 | 12.89374 | 4.83480 | 3.21525 |
| H | 12.89234 | 4.51331 | 4.27749 | 12.93434 | 4.44799 | 4.22610 |
| C | 4.72544  | 4.34841 | 1.80454 | 4.74354  | 4.36440 | 1.81404 |
| C | 6.91362  | 3.05033 | 2.22906 | 6.95123  | 3.06750 | 2.22571 |

**Table S21** Cartesian coordinates of optimized  $T_3$  state of TTABN as the QM layer in the solid phase at B3LYP/6-31G(d) by TDA-DFT.

| Elements | X        | Y        | Z        |
|----------|----------|----------|----------|
| B        | 5.46296  | 2.99167  | 1.86214  |
| C        | 4.90788  | 1.57055  | 1.60488  |
| C        | 3.66219  | 1.24865  | 1.02280  |
| C        | 3.12397  | -0.06005 | 0.96530  |
| C        | 1.75922  | -0.28596 | 0.36891  |
| H        | 1.50159  | -1.34895 | 0.33330  |
| H        | 0.98231  | 0.22724  | 0.95205  |
| H        | 1.69937  | 0.11150  | -0.65316 |
| C        | 3.86815  | -1.10110 | 1.51162  |
| H        | 3.46967  | -2.11209 | 1.53644  |
| C        | 5.14758  | -0.85619 | 2.02836  |
| H        | 5.71279  | -1.68107 | 2.44258  |
| H        | 3.07726  | 2.04760  | 0.57983  |
| C        | 5.69928  | 0.44798  | 2.01730  |
| N        | 7.02901  | 0.62158  | 2.42018  |
| C        | 7.83546  | -0.52802 | 2.72247  |
| C        | 8.30797  | -0.74616 | 4.01602  |
| H        | 8.00085  | -0.08689 | 4.82173  |
| C        | 9.21032  | -1.78175 | 4.25293  |
| H        | 9.60559  | -1.91493 | 5.25110  |
| C        | 9.65252  | -2.62613 | 3.22961  |
| C        | 9.13594  | -2.41874 | 1.94420  |
| H        | 9.43693  | -3.05994 | 1.12127  |
| C        | 10.66204 | -3.71352 | 3.49950  |
| H        | 10.21952 | -4.71432 | 3.41085  |
| H        | 11.08015 | -3.61964 | 4.50482  |
| H        | 11.49928 | -3.66064 | 2.79509  |
| C        | 8.23863  | -1.38697 | 1.69793  |
| H        | 7.83683  | -1.23277 | 0.70995  |
| C        | 7.70205  | 1.87933  | 2.41301  |
| C        | 9.08981  | 1.91665  | 2.55836  |
| H        | 9.67241  | 1.00921  | 2.57965  |
| C        | 9.74905  | 3.15705  | 2.64018  |

|   |          |          |          |
|---|----------|----------|----------|
| C | 9.00574  | 4.35201  | 2.57817  |
| C | 7.62296  | 4.28791  | 2.38619  |
| N | 6.86833  | 5.49611  | 2.33538  |
| C | 5.50456  | 5.55509  | 2.02121  |
| C | 4.88529  | 6.82417  | 1.93940  |
| C | 3.51886  | 6.94046  | 1.66311  |
| C | 2.72834  | 5.80566  | 1.51568  |
| C | 1.25520  | 5.90241  | 1.22395  |
| H | 0.65783  | 5.51136  | 2.05827  |
| H | 0.98414  | 5.30958  | 0.34083  |
| H | 0.95100  | 6.93786  | 1.04177  |
| C | 3.35467  | 4.54229  | 1.61332  |
| H | 2.72255  | 3.66629  | 1.52691  |
| H | 3.08482  | 7.92652  | 1.55057  |
| H | 5.46959  | 7.72491  | 2.07581  |
| C | 7.55550  | 6.70774  | 2.71050  |
| C | 7.67808  | 7.06965  | 4.05412  |
| H | 7.23710  | 6.44361  | 4.82110  |
| C | 8.38606  | 8.21939  | 4.40679  |
| H | 8.47419  | 8.48729  | 5.45756  |
| C | 8.99229  | 9.02595  | 3.43470  |
| C | 8.86598  | 8.64472  | 2.09215  |
| H | 9.32715  | 9.25085  | 1.31619  |
| C | 9.74103  | 10.28321 | 3.80826  |
| H | 9.11227  | 11.17379 | 3.67555  |
| H | 10.06971 | 10.26266 | 4.85207  |
| H | 10.62605 | 10.41741 | 3.17825  |
| C | 8.14863  | 7.50597  | 1.73240  |
| H | 8.03719  | 7.22003  | 0.69417  |
| H | 9.51455  | 5.29764  | 2.69397  |
| N | 11.15368 | 3.19502  | 2.80441  |
| C | 11.84811 | 2.08430  | 3.35923  |
| C | 11.42805 | 1.48517  | 4.55972  |
| H | 10.57632 | 1.89679  | 5.09161  |
| C | 12.09601 | 0.37117  | 5.05412  |
| H | 11.75961 | -0.07904 | 5.98287  |
| C | 13.20091 | -0.18347 | 4.38988  |
| C | 13.91193 | -1.39427 | 4.94779  |
| H | 13.26070 | -2.27789 | 4.95873  |
| H | 14.79702 | -1.64393 | 4.35490  |
| H | 14.24044 | -1.22656 | 5.98114  |
| C | 13.61658 | 0.43066  | 3.20135  |
| H | 14.47298 | 0.02930  | 2.66434  |
| C | 12.96020 | 1.54676  | 2.69064  |
| H | 13.29482 | 1.99967  | 1.76288  |
| C | 11.94057 | 4.29343  | 2.35901  |
| C | 11.84593 | 4.81324  | 1.05821  |
| H | 11.11914 | 4.41178  | 0.36351  |
| C | 12.69868 | 5.83514  | 0.65587  |
| H | 12.63809 | 6.19638  | -0.36541 |
| C | 13.65019 | 6.39031  | 1.52367  |

|   |          |         |         |
|---|----------|---------|---------|
| C | 13.70801 | 5.89227 | 2.82999 |
| H | 14.41256 | 6.32885 | 3.53387 |
| C | 14.59217 | 7.46917 | 1.05601 |
| H | 14.07043 | 8.25622 | 0.50425 |
| H | 15.11789 | 7.93509 | 1.89508 |
| H | 15.35061 | 7.06290 | 0.37811 |
| C | 12.87229 | 4.85913 | 3.24168 |
| H | 12.90787 | 4.48434 | 4.25781 |
| C | 4.73980  | 4.35546 | 1.80600 |
| C | 6.93336  | 3.05624 | 2.24500 |

**Table S22** Cartesian coordinates of optimized  $S_0$  and  $S_1$  states of *PP*-TAzBN as the QM layer in the solid phase at B3LYP/6-31G(d) by DFT and TDA-DFT, respectively.

| Elements | X        | $S_0$    |          | X        | $S_1$   |          |
|----------|----------|----------|----------|----------|---------|----------|
|          |          | Y        | Z        |          | Y       | Z        |
| B        | -3.10095 | -7.44411 | 0.61569  | -3.10095 | 7.49012 | -0.60338 |
| C        | -3.12601 | -6.05480 | 1.20243  | -3.12692 | 6.07068 | -1.20159 |
| C        | -2.05004 | -5.15725 | 1.01881  | -2.05574 | 5.19253 | -1.05333 |
| N        | -0.89908 | -5.61049 | 0.34129  | -0.91771 | 5.60979 | -0.35449 |
| C        | 0.35779  | -5.16544 | 0.87789  | 0.33317  | 5.15764 | -0.88274 |
| C        | 0.63721  | -5.40001 | 2.22537  | 0.60910  | 5.38192 | -2.23533 |
| H        | -0.05786 | -6.00008 | 2.79645  | -0.08168 | 5.99125 | -2.80093 |
| C        | 1.78228  | -4.86790 | 2.80700  | 1.76142  | 4.86143 | -2.81324 |
| H        | 1.96180  | -5.00592 | 3.86589  | 1.94499  | 5.00353 | -3.87080 |
| C        | 2.67560  | -4.13341 | 2.02827  | 2.65975  | 4.13961 | -2.02926 |
| H        | 3.56808  | -3.70309 | 2.46751  | 3.55816  | 3.71720 | -2.46407 |
| C        | 2.41812  | -3.94513 | 0.67403  | 2.39956  | 3.95004 | -0.67394 |
| H        | 3.10732  | -3.36340 | 0.07411  | 3.08974  | 3.36943 | -0.07380 |
| C        | 1.25941  | -4.45408 | 0.08382  | 1.24027  | 4.45223 | -0.08281 |
| C        | 0.95633  | -4.34110 | -1.37616 | 0.92051  | 4.29541 | 1.36925  |
| H        | 1.67651  | -3.67893 | -1.85967 | 1.64127  | 3.62449 | 1.84073  |
| H        | -0.03081 | -3.89195 | -1.51383 | -0.06169 | 3.82556 | 1.47509  |
| C        | 1.01553  | -5.72352 | -2.04264 | 0.94742  | 5.65162 | 2.08524  |
| H        | 0.89355  | -5.58491 | -3.12192 | 0.76520  | 5.47139 | 3.15123  |
| H        | 2.02838  | -6.12574 | -1.89941 | 1.96892  | 6.05329 | 2.01902  |
| C        | -0.00869 | -6.78009 | -1.63033 | -0.03863 | 6.73437 | 1.65943  |
| C        | -0.05524 | -7.90414 | -2.46193 | -0.03031 | 7.87719 | 2.48818  |
| H        | 0.67819  | -7.97449 | -3.26361 | 0.71203  | 7.93417 | 3.28120  |
| C        | -1.04754 | -8.87447 | -2.35334 | -0.98756 | 8.87444 | 2.34959  |
| C        | -2.01686 | -8.72599 | -1.37339 | -1.95959 | 8.76182 | 1.36423  |
| H        | -2.83981 | -9.42741 | -1.33206 | -2.74236 | 9.50597 | 1.30999  |
| H        | -1.09055 | -9.70402 | -3.05271 | -1.00493 | 9.72050 | 3.03070  |
| C        | -0.95299 | -6.69287 | -0.57645 | -0.97163 | 6.68507 | 0.61075  |
| C        | -2.10398 | -3.83942 | 1.48514  | -2.10402 | 3.84572 | -1.52975 |
| H        | -1.27256 | -3.16860 | 1.31461  | -1.26332 | 3.18727 | -1.35567 |
| C        | -3.26346 | -3.38009 | 2.14088  | -3.26102 | 3.36427 | -2.16701 |
| N        | -3.36557 | -2.04713 | 2.57523  | -3.36533 | 2.02829 | -2.59911 |

|   |           |           |         |           |          |          |
|---|-----------|-----------|---------|-----------|----------|----------|
| C | -2.20525  | -1.21574  | 2.72173 | -2.19969  | 1.20667  | -2.75297 |
| C | -1.70424  | -0.48770  | 1.63987 | -1.69073  | 0.48273  | -1.67169 |
| H | -2.20341  | -0.55846  | 0.67763 | -2.19050  | 0.54692  | -0.70917 |
| C | -0.57913  | 0.32089   | 1.80832 | -0.56042  | -0.31799 | -1.84246 |
| H | -0.18845  | 0.89364   | 0.97175 | -0.16440  | -0.88887 | -1.00722 |
| C | 0.03986   | 0.38883   | 3.05600 | 0.05520   | -0.38139 | -3.09205 |
| H | 0.93374   | 0.98882   | 3.18419 | 0.95082   | -0.97784 | -3.22345 |
| C | -0.47636  | -0.32388  | 4.13943 | -0.46671  | 0.32982  | -4.17374 |
| H | 0.01234   | -0.26148  | 5.10871 | 0.02151   | 0.27156  | -5.14330 |
| C | -1.61109  | -1.12627  | 3.99139 | -1.60659  | 1.12468  | -4.02359 |
| C | -2.25154  | -1.87512  | 5.13475 | -2.25292  | 1.87111  | -5.16560 |
| H | -1.59784  | -1.84174  | 6.01422 | -1.60105  | 1.83958  | -6.04630 |
| H | -2.36768  | -2.92968  | 4.86211 | -2.37070  | 2.92615  | -4.89446 |
| C | -3.62700  | -1.30955  | 5.54491 | -3.62775  | 1.30269  | -5.57368 |
| H | -3.47969  | -0.30768  | 5.96911 | -3.47950  | 0.29870  | -5.99205 |
| H | -4.00970  | -1.92194  | 6.37269 | -4.00936  | 1.90986  | -6.40557 |
| C | -4.72245  | -1.20305  | 4.48933 | -4.72507  | 1.20188  | -4.51967 |
| C | -5.96770  | -0.71171  | 4.91850 | -5.97358  | 0.72063  | -4.95143 |
| H | -6.09045  | -0.45776  | 5.96941 | -6.09783  | 0.47279  | -6.00344 |
| C | -7.04351  | -0.55438  | 4.05157 | -7.05067  | 0.56547  | -4.08581 |
| H | -7.99194  | -0.18026  | 4.42773 | -8.00076  | 0.19824  | -4.46428 |
| C | -6.88926  | -0.86480  | 2.69835 | -6.89543  | 0.86834  | -2.73084 |
| H | -7.70898  | -0.72574  | 1.99944 | -7.71528  | 0.72888  | -2.03237 |
| C | -5.66739  | -1.34784  | 2.24739 | -5.67071  | 1.34144  | -2.27704 |
| H | -5.52221  | -1.59472  | 1.19998 | -5.52403  | 1.57753  | -1.22714 |
| C | -4.58870  | -1.53720  | 3.12746 | -4.59000  | 1.52788  | -3.15572 |
| C | -4.32826  | -4.26822  | 2.37502 | -4.32044  | 4.26169  | -2.37890 |
| H | -5.19308  | -3.93683  | 2.93096 | -5.18835  | 3.94664  | -2.94009 |
| C | -4.25075  | -5.58520  | 1.91815 | -4.24227  | 5.59774  | -1.89525 |
| N | -5.29942  | -6.47409  | 2.18864 | -5.28403  | 6.47197  | -2.18014 |
| C | -5.14200  | -7.88200  | 2.09507 | -5.12339  | 7.91123  | -2.11973 |
| C | -5.91630  | -8.73911  | 2.91809 | -5.89266  | 8.73970  | -2.95011 |
| C | -6.68762  | -8.34770  | 4.17851 | -6.66345  | 8.33848  | -4.20174 |
| C | -6.66991  | -6.87007  | 4.58709 | -6.66981  | 6.85596  | -4.58463 |
| C | -7.31292  | -6.04751  | 3.51256 | -7.30772  | 6.05432  | -3.49184 |
| C | -8.58753  | -5.48604  | 3.62461 | -8.58220  | 5.49364  | -3.59024 |
| H | -9.12143  | -5.59769  | 4.56203 | -9.12733  | 5.61239  | -4.52035 |
| C | -9.14717  | -4.77163  | 2.56666 | -9.13105  | 4.76974  | -2.53132 |
| H | -10.13614 | -4.33282  | 2.65402 | -10.12473 | 4.33986  | -2.61201 |
| C | -8.42696  | -4.61581  | 1.38196 | -8.39340  | 4.59271  | -1.36082 |
| H | -8.83706  | -4.02768  | 0.57017 | -8.79397  | 3.99907  | -0.54821 |
| C | -7.17228  | -5.20084  | 1.24383 | -7.13296  | 5.16951  | -1.23581 |
| H | -6.61027  | -5.09339  | 0.32442 | -6.56217  | 5.05933  | -0.32278 |
| H | -5.63681  | -6.53999  | 4.74737 | -5.64179  | 6.51169  | -4.75131 |
| H | -7.19918  | -6.74436  | 5.53358 | -7.21080  | 6.71626  | -5.52278 |
| H | -6.28577  | -8.94578  | 5.00765 | -6.25021  | 8.91380  | -5.04216 |
| H | -7.73350  | -8.65612  | 4.07187 | -7.70372  | 8.67127  | -4.10376 |
| C | -5.88553  | -10.10824 | 2.64085 | -5.90074  | 10.12558 | -2.67681 |
| H | -6.50943  | -10.76840 | 3.24139 | -6.53801  | 10.77039 | -3.27764 |
| C | -5.03392  | -10.65256 | 1.68488 | -5.08019  | 10.66460 | -1.69532 |
| H | -5.02408  | -11.72405 | 1.52299 | -5.09354  | 11.73501 | -1.51904 |



|   |          |           |          |          |          |          |
|---|----------|-----------|----------|----------|----------|----------|
| C | -4.15396 | -9.81444  | 1.01340  | -4.21027 | 9.84379  | -0.98544 |
| H | -3.40601 | -10.25077 | 0.36335  | -3.50965 | 10.29860 | -0.29706 |
| C | -6.61773 | -5.91537  | 2.30906  | -6.59547 | 5.90749  | -2.29620 |
| C | -1.99206 | -7.66752  | -0.44906 | -1.99244 | 7.68802  | 0.44864  |
| C | -4.17534 | -8.41717  | 1.18682  | -4.17103 | 8.43955  | -1.17392 |

**Table S23** Cartesian coordinates of optimized  $T_1$  and  $T_2$  states of *PP*-TAzBN as the QM layer in the solid phase at B3LYP/6-31G(d) by TDA-DFT.

| Elements | X        | Y        | Z        | X        | Y        | Z        |
|----------|----------|----------|----------|----------|----------|----------|
|          |          | $T_1$    |          |          | $T_2$    |          |
| B        | -3.09706 | 7.48349  | -0.60709 | -3.10802 | 7.47609  | -0.59888 |
| C        | -3.12444 | 6.07941  | -1.19626 | -3.13470 | 6.04902  | -1.19883 |
| C        | -2.05692 | 5.18701  | -1.04217 | -2.04508 | 5.14424  | -1.01681 |
| N        | -0.90876 | 5.61582  | -0.34980 | -0.89554 | 5.63779  | -0.37538 |
| C        | 0.34217  | 5.15856  | -0.87998 | 0.35957  | 5.18947  | -0.89741 |
| C        | 0.61659  | 5.38758  | -2.23076 | 0.65016  | 5.41518  | -2.24505 |
| H        | -0.07565 | 5.99546  | -2.79624 | -0.03313 | 6.02601  | -2.81902 |
| C        | 1.76711  | 4.86448  | -2.80987 | 1.79290  | 4.87106  | -2.81904 |
| H        | 1.95003  | 5.00770  | -3.86729 | 1.97841  | 5.00307  | -3.87752 |
| C        | 2.66245  | 4.13531  | -2.02894 | 2.67957  | 4.13641  | -2.03208 |
| H        | 3.55880  | 3.71109  | -2.46616 | 3.57304  | 3.70098  | -2.46430 |
| C        | 2.40163  | 3.94042  | -0.67525 | 2.41310  | 3.95542  | -0.67882 |
| H        | 3.08933  | 3.35510  | -0.07684 | 3.09515  | 3.37128  | -0.07258 |
| C        | 1.24357  | 4.44576  | -0.08287 | 1.25264  | 4.47015  | -0.09639 |
| C        | 0.92505  | 4.29344  | 1.37007  | 0.92908  | 4.32429  | 1.35746  |
| H        | 1.64339  | 3.62074  | 1.84235  | 1.64609  | 3.65304  | 1.83526  |
| H        | -0.05904 | 3.82885  | 1.48004  | -0.05651 | 3.86211  | 1.46687  |
| C        | 0.96091  | 5.65209  | 2.08142  | 0.96110  | 5.68424  | 2.06735  |
| H        | 0.78433  | 5.47693  | 3.14869  | 0.79891  | 5.51088  | 3.13788  |
| H        | 1.98260  | 6.05088  | 2.00588  | 1.97914  | 6.09162  | 1.98069  |
| C        | -0.02509 | 6.73710  | 1.65881  | -0.04259 | 6.75364  | 1.65232  |
| C        | -0.02043 | 7.87511  | 2.48491  | -0.05261 | 7.89543  | 2.49198  |
| H        | 0.71714  | 7.93392  | 3.28203  | 0.69925  | 7.96164  | 3.27568  |
| C        | -0.98357 | 8.87167  | 2.34510  | -1.02783 | 8.87198  | 2.37268  |
| C        | -1.95618 | 8.75881  | 1.36321  | -2.00387 | 8.73980  | 1.38938  |
| H        | -2.73978 | 9.50242  | 1.31173  | -2.80814 | 9.46171  | 1.34392  |
| H        | -1.00273 | 9.71606  | 3.02834  | -1.05698 | 9.71387  | 3.05861  |
| C        | -0.96348 | 6.68273  | 0.60838  | -0.96644 | 6.69825  | 0.59878  |
| C        | -2.11261 | 3.84566  | -1.50316 | -2.10666 | 3.83138  | -1.47565 |
| H        | -1.27367 | 3.18411  | -1.32822 | -1.27864 | 3.15680  | -1.30235 |
| C        | -3.26404 | 3.36745  | -2.15230 | -3.25562 | 3.38467  | -2.17808 |
| N        | -3.37111 | 2.02642  | -2.58359 | -3.34756 | 2.07313  | -2.65165 |
| C        | -2.20454 | 1.20899  | -2.74643 | -2.19169 | 1.22788  | -2.77707 |
| C        | -1.68962 | 0.48213  | -1.66956 | -1.70007 | 0.51935  | -1.67912 |
| H        | -2.18666 | 0.54222  | -0.70534 | -2.19878 | 0.60898  | -0.71848 |
| C        | -0.55893 | -0.31679 | -1.84638 | -0.57778 | -0.29528 | -1.83380 |
| H        | -0.15955 | -0.88983 | -1.01413 | -0.18979 | -0.85428 | -0.98722 |

|   |           |          |          |           |          |          |
|---|-----------|----------|----------|-----------|----------|----------|
| C | 0.05231   | -0.37629 | -3.09831 | 0.04346   | -0.38354 | -3.07899 |
| H | 0.94731   | -0.97257 | -3.23517 | 0.93712   | -0.98586 | -3.19471 |
| C | -0.47430  | 0.33795  | -4.17572 | -0.46917  | 0.31056  | -4.17589 |
| H | 0.01000   | 0.28273  | -5.14748 | 0.02354   | 0.23319  | -5.14148 |
| C | -1.61445  | 1.13117  | -4.01885 | -1.60440  | 1.11535  | -4.04658 |
| C | -2.26768  | 1.87687  | -5.15705 | -2.25046  | 1.83896  | -5.20316 |
| H | -1.61881  | 1.85045  | -6.04025 | -1.60314  | 1.78331  | -6.08557 |
| H | -2.39101  | 2.93058  | -4.88309 | -2.36141  | 2.90077  | -4.95670 |
| C | -3.64017  | 1.29940  | -5.55960 | -3.63092  | 1.26668  | -5.58960 |
| H | -3.48699  | 0.29446  | -5.97410 | -3.49123  | 0.25947  | -6.00156 |
| H | -4.02759  | 1.90080  | -6.39310 | -4.02260  | 1.86813  | -6.42074 |
| C | -4.73400  | 1.19816  | -4.50188 | -4.71636  | 1.17652  | -4.52230 |
| C | -5.98246  | 0.71401  | -4.93032 | -5.96739  | 0.68200  | -4.92652 |
| H | -6.10734  | 0.46159  | -5.98131 | -6.10175  | 0.40360  | -5.96925 |
| C | -7.05883  | 0.56179  | -4.06333 | -7.03719  | 0.55503  | -4.04622 |
| H | -8.00872  | 0.19145  | -4.43928 | -7.98977  | 0.17519  | -4.40482 |
| C | -6.90250  | 0.87222  | -2.71009 | -6.87497  | 0.90785  | -2.70430 |
| H | -7.72175  | 0.73593  | -2.01016 | -7.69171  | 0.79712  | -1.99749 |
| C | -5.67744  | 1.34698  | -2.25945 | -5.65109  | 1.40410  | -2.27559 |
| H | -5.52960  | 1.58724  | -1.21063 | -5.50057  | 1.68772  | -1.23864 |
| C | -4.59574  | 1.52854  | -3.13865 | -4.57847  | 1.55154  | -3.17145 |
| C | -4.31679  | 4.27213  | -2.37689 | -4.31910  | 4.28664  | -2.43207 |
| H | -5.18571  | 3.95389  | -2.93564 | -5.16998  | 3.96492  | -3.01518 |
| C | -4.23953  | 5.59955  | -1.89832 | -4.26103  | 5.58361  | -1.94273 |
| N | -5.28682  | 6.48088  | -2.18101 | -5.31404  | 6.47731  | -2.14858 |
| C | -5.12730  | 7.90714  | -2.11982 | -5.13725  | 7.90736  | -2.09845 |
| C | -5.90342  | 8.74128  | -2.94891 | -5.89297  | 8.74204  | -2.93319 |
| C | -6.66966  | 8.33613  | -4.20381 | -6.66723  | 8.34206  | -4.18254 |
| C | -6.65935  | 6.85512  | -4.59471 | -6.66923  | 6.85952  | -4.56845 |
| C | -7.29962  | 6.04661  | -3.50841 | -7.31879  | 6.05226  | -3.48500 |
| C | -8.57202  | 5.48077  | -3.61301 | -8.59252  | 5.48924  | -3.60232 |
| H | -9.11025  | 5.58886  | -4.54848 | -9.12440  | 5.60579  | -4.54050 |
| C | -9.12746  | 4.76774  | -2.55083 | -9.15343  | 4.76692  | -2.55064 |
| H | -10.11838 | 4.33251  | -2.63482 | -10.14276 | 4.32952  | -2.64232 |
| C | -8.40131  | 4.60864  | -1.37078 | -8.43387  | 4.60266  | -1.36635 |
| H | -8.80760  | 4.02249  | -0.55579 | -8.84476  | 4.00885  | -0.55923 |
| C | -7.14361  | 5.19024  | -1.24042 | -7.18161  | 5.19105  | -1.22097 |
| H | -6.57915  | 5.09028  | -0.32223 | -6.62463  | 5.08594  | -0.29833 |
| H | -5.62752  | 6.52031  | -4.75606 | -5.63873  | 6.51754  | -4.72496 |
| H | -7.19278  | 6.71600  | -5.53712 | -7.19983  | 6.72445  | -5.51370 |
| H | -6.26188  | 8.92063  | -5.03992 | -6.25777  | 8.92271  | -5.02148 |
| H | -7.71348  | 8.65566  | -4.10357 | -7.70893  | 8.67055  | -4.08310 |
| C | -5.90866  | 10.12027 | -2.67579 | -5.88707  | 10.13375 | -2.66277 |
| H | -6.53795  | 10.77021 | -3.27927 | -6.53495  | 10.77803 | -3.25336 |
| C | -5.08187  | 10.65791 | -1.69255 | -5.04917  | 10.67266 | -1.70236 |
| H | -5.09300  | 11.72872 | -1.51804 | -5.05264  | 11.74298 | -1.52804 |
| C | -4.20845  | 9.83989  | -0.98847 | -4.17250  | 9.84094  | -1.00688 |
| H | -3.50541  | 10.29606 | -0.30338 | -3.45039  | 10.28720 | -0.33505 |
| C | -6.59972  | 5.91347  | -2.30597 | -6.62623  | 5.91896  | -2.27766 |
| C | -1.99092  | 7.68495  | 0.44835  | -2.00291  | 7.67974  | 0.45637  |
| C | -4.16512  | 8.43689  | -1.17936 | -4.17011  | 8.43387  | -1.17627 |

**Table S24** Cartesian coordinates of optimized  $T_3$  state of *PP*-TAzBN as the QM layer in the solid phase at B3LYP/6-31G(d) by TDA-DFT.

| Elements | X        | Y        | Z        |
|----------|----------|----------|----------|
| B        | -3.09594 | 7.46817  | -0.60939 |
| C        | -3.12749 | 6.06686  | -1.19739 |
| C        | -2.06404 | 5.16330  | -1.02256 |
| N        | -0.89364 | 5.62313  | -0.33547 |
| C        | 0.35482  | 5.17819  | -0.87544 |
| C        | 0.62654  | 5.40589  | -2.22693 |
| H        | -0.07021 | 6.00738  | -2.79396 |
| C        | 1.77225  | 4.87707  | -2.80929 |
| H        | 1.95029  | 5.01670  | -3.86817 |
| C        | 2.67008  | 4.14520  | -2.03221 |
| H        | 3.56188  | 3.71562  | -2.47348 |
| C        | 2.41466  | 3.95383  | -0.67803 |
| H        | 3.10249  | 3.36679  | -0.08127 |
| C        | 1.25782  | 4.46156  | -0.08366 |
| C        | 0.93722  | 4.30389  | 1.36887  |
| H        | 1.65429  | 3.62934  | 1.84057  |
| H        | -0.04808 | 3.84033  | 1.47469  |
| C        | 0.96960  | 5.65773  | 2.08914  |
| H        | 0.79011  | 5.47866  | 3.15574  |
| H        | 1.99054  | 6.06051  | 2.01967  |
| C        | -0.01436 | 6.74226  | 1.66898  |
| C        | -0.01222 | 7.88283  | 2.49151  |
| H        | 0.72951  | 7.95064  | 3.28368  |
| C        | -0.99177 | 8.86322  | 2.35905  |
| C        | -1.97378 | 8.73535  | 1.37888  |
| H        | -2.75691 | 9.47990  | 1.32472  |
| H        | -1.01687 | 9.71098  | 3.03796  |
| C        | -0.96066 | 6.67130  | 0.61536  |
| C        | -2.11587 | 3.83973  | -1.46384 |
| H        | -1.28757 | 3.16793  | -1.28088 |
| C        | -3.26048 | 3.39114  | -2.16217 |
| N        | -3.35520 | 2.07312  | -2.64581 |
| C        | -2.19939 | 1.23146  | -2.77142 |
| C        | -1.70563 | 0.52323  | -1.67352 |
| H        | -2.20565 | 0.61234  | -0.71347 |
| C        | -0.58292 | -0.29120 | -1.82667 |
| H        | -0.19601 | -0.85058 | -0.97966 |
| C        | 0.03910  | -0.38117 | -3.07144 |
| H        | 0.93210  | -0.98486 | -3.18659 |
| C        | -0.47286 | 0.31311  | -4.16852 |
| H        | 0.01990  | 0.23511  | -5.13422 |
| C        | -1.60767 | 1.11863  | -4.03943 |
| C        | -2.25097 | 1.84361  | -5.19637 |
| H        | -1.60028 | 1.79260  | -6.07680 |
| H        | -2.36663 | 2.90388  | -4.94561 |
| C        | -3.62802 | 1.26804  | -5.58858 |

|   |           |          |          |
|---|-----------|----------|----------|
| H | -3.48448  | 0.26019  | -5.99779 |
| H | -4.01723  | 1.86682  | -6.42302 |
| C | -4.71707  | 1.18033  | -4.52509 |
| C | -5.96635  | 0.68528  | -4.93358 |
| H | -6.09560  | 0.40258  | -5.97589 |
| C | -7.04133  | 0.56306  | -4.05878 |
| H | -7.99208  | 0.18121  | -4.42036 |
| C | -6.88544  | 0.92416  | -2.71792 |
| H | -7.70513  | 0.81622  | -2.01397 |
| C | -5.66354  | 1.42100  | -2.28563 |
| H | -5.51763  | 1.70799  | -1.24895 |
| C | -4.58222  | 1.56108  | -3.17424 |
| C | -4.31886  | 4.29902  | -2.41214 |
| H | -5.16928  | 3.98723  | -3.00153 |
| C | -4.24258  | 5.59652  | -1.91562 |
| N | -5.30692  | 6.50130  | -2.17856 |
| C | -5.13060  | 7.90693  | -2.12187 |
| C | -5.91076  | 8.75785  | -2.94564 |
| C | -6.67315  | 8.35412  | -4.20058 |
| C | -6.67432  | 6.87138  | -4.58441 |
| C | -7.31907  | 6.06679  | -3.49711 |
| C | -8.59054  | 5.49810  | -3.60488 |
| H | -9.12699  | 5.60696  | -4.54125 |
| C | -9.14301  | 4.77831  | -2.54661 |
| H | -10.13139 | 4.33737  | -2.63178 |
| C | -8.41478  | 4.61916  | -1.36687 |
| H | -8.81842  | 4.02722  | -0.55456 |
| C | -7.16095  | 5.20703  | -1.23260 |
| H | -6.59453  | 5.10139  | -0.31617 |
| H | -5.64434  | 6.52944  | -4.74284 |
| H | -7.20720  | 6.73412  | -5.52741 |
| H | -6.25965  | 8.93450  | -5.03754 |
| H | -7.71412  | 8.68470  | -4.10352 |
| C | -5.91343  | 10.13604 | -2.66585 |
| H | -6.54868  | 10.79000 | -3.25826 |
| C | -5.06914  | 10.66416 | -1.69562 |
| H | -5.07252  | 11.73331 | -1.51281 |
| C | -4.18545  | 9.83329  | -1.00426 |
| H | -3.48151  | 10.28535 | -0.31688 |
| C | -6.61785  | 5.93653  | -2.29476 |
| C | -1.99975  | 7.66842  | 0.46323  |
| C | -4.15352  | 8.43528  | -1.19235 |

**Table S25** Vibration frequencies of TTABN in toluene at B3LYP/6-31G(d) by (TDA)-DFT.

| No. | S <sub>0</sub> | S <sub>1</sub> | T <sub>1</sub> | T <sub>2</sub> | T <sub>3</sub> |
|-----|----------------|----------------|----------------|----------------|----------------|
| 1   | 9.18           | 9.54           | 8.60           | 8.59           | 7.92           |
| 2   | 11.34          | 11.38          | 10.53          | 12.07          | 10.11          |
| 3   | 17.97          | 17.22          | 16.85          | 15.73          | 16.23          |

|    |        |        |        |        |        |
|----|--------|--------|--------|--------|--------|
| 4  | 21.29  | 19.82  | 18.69  | 21.66  | 20.51  |
| 5  | 25.55  | 25.41  | 23.51  | 27.13  | 24.87  |
| 6  | 27.33  | 29.80  | 25.36  | 29.49  | 25.61  |
| 7  | 27.49  | 32.65  | 31.84  | 31.31  | 30.14  |
| 8  | 28.01  | 33.34  | 33.99  | 34.25  | 34.10  |
| 9  | 31.67  | 35.16  | 34.88  | 34.77  | 34.81  |
| 10 | 34.70  | 35.72  | 35.88  | 36.28  | 37.43  |
| 11 | 38.41  | 37.99  | 36.00  | 37.10  | 38.22  |
| 12 | 43.59  | 38.94  | 40.07  | 38.28  | 42.92  |
| 13 | 45.98  | 41.81  | 42.38  | 42.01  | 45.44  |
| 14 | 48.19  | 44.01  | 44.16  | 46.44  | 46.56  |
| 15 | 49.94  | 45.33  | 45.23  | 47.18  | 48.28  |
| 16 | 55.75  | 47.70  | 47.69  | 49.18  | 58.24  |
| 17 | 56.20  | 48.58  | 48.63  | 51.04  | 64.26  |
| 18 | 60.60  | 59.20  | 59.08  | 58.57  | 71.13  |
| 19 | 68.06  | 65.04  | 64.96  | 62.18  | 74.83  |
| 20 | 69.36  | 68.31  | 68.96  | 74.60  | 85.83  |
| 21 | 81.48  | 76.48  | 76.38  | 82.40  | 92.47  |
| 22 | 108.83 | 106.91 | 106.30 | 105.98 | 107.53 |
| 23 | 108.92 | 108.27 | 108.38 | 107.94 | 108.20 |
| 24 | 127.57 | 128.36 | 127.08 | 124.85 | 127.96 |
| 25 | 142.93 | 140.96 | 141.27 | 138.41 | 139.88 |
| 26 | 144.86 | 142.91 | 141.69 | 141.57 | 141.88 |
| 27 | 154.71 | 151.91 | 152.12 | 154.17 | 153.28 |
| 28 | 161.60 | 162.22 | 162.03 | 159.99 | 161.27 |
| 29 | 169.04 | 168.82 | 170.19 | 175.57 | 171.65 |
| 30 | 177.19 | 176.78 | 176.77 | 177.55 | 178.60 |
| 31 | 198.55 | 185.82 | 189.43 | 194.26 | 186.94 |
| 32 | 199.05 | 192.61 | 198.32 | 204.25 | 200.91 |
| 33 | 211.58 | 206.69 | 209.02 | 214.57 | 211.78 |
| 34 | 215.01 | 215.00 | 216.28 | 215.85 | 215.09 |
| 35 | 220.48 | 220.34 | 224.83 | 225.01 | 220.10 |
| 36 | 260.27 | 250.33 | 254.46 | 264.80 | 258.67 |
| 37 | 266.99 | 261.98 | 264.03 | 266.30 | 264.68 |
| 38 | 268.18 | 265.10 | 266.58 | 267.54 | 266.03 |
| 39 | 302.94 | 296.10 | 295.28 | 302.50 | 296.92 |
| 40 | 303.22 | 303.13 | 302.77 | 304.22 | 300.69 |
| 41 | 314.51 | 312.39 | 313.20 | 311.52 | 310.06 |
| 42 | 326.58 | 318.73 | 318.20 | 325.94 | 319.12 |
| 43 | 333.25 | 331.01 | 328.87 | 327.01 | 329.47 |
| 44 | 334.45 | 332.56 | 329.97 | 330.19 | 331.30 |
| 45 | 350.15 | 347.46 | 347.62 | 347.09 | 345.62 |
| 46 | 351.14 | 352.62 | 351.18 | 347.70 | 347.26 |
| 47 | 351.63 | 353.01 | 352.39 | 353.25 | 351.50 |
| 48 | 356.68 | 355.74 | 355.97 | 358.04 | 355.81 |
| 49 | 374.26 | 373.62 | 372.73 | 374.31 | 372.80 |
| 50 | 385.68 | 380.59 | 383.77 | 381.12 | 379.31 |
| 51 | 414.92 | 393.71 | 397.67 | 403.75 | 387.39 |
| 52 | 422.46 | 418.57 | 417.55 | 415.54 | 409.43 |
| 53 | 424.97 | 421.09 | 421.21 | 423.03 | 416.82 |
| 54 | 425.96 | 422.40 | 422.32 | 423.92 | 421.07 |

|     |        |        |        |        |        |
|-----|--------|--------|--------|--------|--------|
| 55  | 426.14 | 423.21 | 423.78 | 425.85 | 423.87 |
| 56  | 430.70 | 425.33 | 424.71 | 427.15 | 424.64 |
| 57  | 431.95 | 427.82 | 428.51 | 429.01 | 426.86 |
| 58  | 435.61 | 431.88 | 433.62 | 435.50 | 427.88 |
| 59  | 454.09 | 436.62 | 438.43 | 447.76 | 446.70 |
| 60  | 454.23 | 450.36 | 450.66 | 449.42 | 450.24 |
| 61  | 458.13 | 458.28 | 456.95 | 463.91 | 457.39 |
| 62  | 492.97 | 489.44 | 492.86 | 482.03 | 478.26 |
| 63  | 496.10 | 494.83 | 493.37 | 498.06 | 495.44 |
| 64  | 513.54 | 510.19 | 509.66 | 503.96 | 513.26 |
| 65  | 518.85 | 515.07 | 516.30 | 509.13 | 516.32 |
| 66  | 527.96 | 516.92 | 522.76 | 524.05 | 525.68 |
| 67  | 530.55 | 526.40 | 524.86 | 526.87 | 528.19 |
| 68  | 548.50 | 530.20 | 530.02 | 533.95 | 544.44 |
| 69  | 559.33 | 550.40 | 549.32 | 561.37 | 551.59 |
| 70  | 561.46 | 567.27 | 566.19 | 566.86 | 564.01 |
| 71  | 569.34 | 570.57 | 568.26 | 570.85 | 568.56 |
| 72  | 595.43 | 586.02 | 587.52 | 590.93 | 585.64 |
| 73  | 601.74 | 592.62 | 593.71 | 594.51 | 593.39 |
| 74  | 613.76 | 600.11 | 600.73 | 595.17 | 599.25 |
| 75  | 623.69 | 600.82 | 604.16 | 601.61 | 600.65 |
| 76  | 632.33 | 612.61 | 614.20 | 611.27 | 612.48 |
| 77  | 637.15 | 616.15 | 614.58 | 615.67 | 619.40 |
| 78  | 652.46 | 620.34 | 619.26 | 617.20 | 640.30 |
| 79  | 656.96 | 652.10 | 650.64 | 645.39 | 646.81 |
| 80  | 658.39 | 652.46 | 653.05 | 649.23 | 652.13 |
| 81  | 660.26 | 657.13 | 657.06 | 657.14 | 656.39 |
| 82  | 663.01 | 659.76 | 659.43 | 658.40 | 659.52 |
| 83  | 667.29 | 660.87 | 660.44 | 664.10 | 659.59 |
| 84  | 682.31 | 672.24 | 672.47 | 676.82 | 666.01 |
| 85  | 711.65 | 702.87 | 701.84 | 704.78 | 704.41 |
| 86  | 713.04 | 703.99 | 702.06 | 712.34 | 711.18 |
| 87  | 723.53 | 712.05 | 719.35 | 713.90 | 714.46 |
| 88  | 728.24 | 722.41 | 721.12 | 714.79 | 716.43 |
| 89  | 744.43 | 724.62 | 722.96 | 728.14 | 720.89 |
| 90  | 748.77 | 738.43 | 740.08 | 741.14 | 725.39 |
| 91  | 752.33 | 743.63 | 743.53 | 749.01 | 742.32 |
| 92  | 757.04 | 747.36 | 746.43 | 750.64 | 749.87 |
| 93  | 792.48 | 757.60 | 762.93 | 774.18 | 763.64 |
| 94  | 796.16 | 789.49 | 786.77 | 785.74 | 786.19 |
| 95  | 797.94 | 790.25 | 793.49 | 791.68 | 791.45 |
| 96  | 804.90 | 791.79 | 794.86 | 796.80 | 793.10 |
| 97  | 806.84 | 795.70 | 796.74 | 800.32 | 795.17 |
| 98  | 812.85 | 799.68 | 797.11 | 802.42 | 802.99 |
| 99  | 826.43 | 806.73 | 806.72 | 808.02 | 807.67 |
| 100 | 826.79 | 809.57 | 809.49 | 808.43 | 812.99 |
| 101 | 827.11 | 830.12 | 829.97 | 811.18 | 829.14 |
| 102 | 832.85 | 834.51 | 833.39 | 817.97 | 831.60 |
| 103 | 836.69 | 836.17 | 837.19 | 826.39 | 832.98 |
| 104 | 838.91 | 837.13 | 841.90 | 829.30 | 833.80 |
| 105 | 839.68 | 843.61 | 845.62 | 834.39 | 835.02 |

|     |         |         |         |         |         |
|-----|---------|---------|---------|---------|---------|
| 106 | 845.99  | 845.83  | 845.64  | 837.31  | 839.27  |
| 107 | 846.52  | 846.44  | 851.57  | 838.29  | 842.96  |
| 108 | 850.04  | 850.84  | 852.35  | 847.79  | 845.42  |
| 109 | 854.22  | 852.29  | 853.31  | 848.65  | 848.82  |
| 110 | 854.53  | 853.07  | 854.43  | 854.42  | 849.48  |
| 111 | 855.72  | 855.86  | 872.45  | 854.71  | 853.05  |
| 112 | 910.44  | 871.84  | 881.10  | 899.14  | 853.09  |
| 113 | 921.55  | 889.98  | 900.30  | 899.52  | 865.26  |
| 114 | 931.03  | 891.78  | 901.92  | 911.98  | 880.98  |
| 115 | 937.60  | 894.75  | 903.23  | 914.83  | 881.09  |
| 116 | 945.46  | 908.17  | 907.14  | 919.95  | 906.46  |
| 117 | 947.87  | 919.34  | 919.26  | 926.74  | 908.75  |
| 118 | 959.63  | 932.27  | 933.91  | 935.55  | 930.98  |
| 119 | 960.88  | 938.33  | 937.02  | 938.67  | 940.16  |
| 120 | 961.14  | 955.01  | 956.49  | 954.96  | 951.99  |
| 121 | 961.46  | 959.67  | 958.03  | 965.47  | 958.21  |
| 122 | 961.73  | 960.08  | 959.14  | 965.74  | 959.15  |
| 123 | 962.49  | 960.87  | 959.44  | 967.75  | 960.41  |
| 124 | 967.14  | 962.43  | 962.04  | 968.90  | 961.37  |
| 125 | 967.74  | 967.23  | 968.34  | 969.81  | 961.89  |
| 126 | 967.82  | 967.32  | 968.40  | 971.18  | 967.46  |
| 127 | 970.55  | 968.57  | 969.13  | 972.37  | 967.51  |
| 128 | 971.59  | 969.82  | 970.44  | 972.95  | 969.08  |
| 129 | 988.77  | 977.06  | 976.03  | 986.45  | 969.99  |
| 130 | 1017.99 | 1017.80 | 1017.18 | 1017.93 | 1002.25 |
| 131 | 1018.02 | 1018.18 | 1017.28 | 1018.31 | 1016.91 |
| 132 | 1019.74 | 1020.32 | 1020.48 | 1018.39 | 1017.38 |
| 133 | 1019.77 | 1020.35 | 1020.52 | 1018.53 | 1019.99 |
| 134 | 1032.34 | 1025.49 | 1027.04 | 1022.72 | 1020.04 |
| 135 | 1034.88 | 1032.12 | 1031.50 | 1027.39 | 1025.08 |
| 136 | 1036.01 | 1034.49 | 1033.81 | 1027.75 | 1033.89 |
| 137 | 1037.47 | 1035.49 | 1034.84 | 1031.15 | 1034.36 |
| 138 | 1040.20 | 1038.94 | 1038.48 | 1037.51 | 1040.46 |
| 139 | 1041.13 | 1041.18 | 1041.01 | 1039.92 | 1041.19 |
| 140 | 1072.11 | 1066.33 | 1061.81 | 1040.88 | 1054.16 |
| 141 | 1073.70 | 1067.04 | 1064.75 | 1066.95 | 1059.86 |
| 142 | 1074.45 | 1069.08 | 1067.26 | 1067.89 | 1061.34 |
| 143 | 1074.91 | 1073.60 | 1073.36 | 1072.06 | 1061.53 |
| 144 | 1075.49 | 1074.08 | 1073.71 | 1073.03 | 1072.66 |
| 145 | 1076.25 | 1075.22 | 1075.21 | 1074.55 | 1073.53 |
| 146 | 1077.31 | 1075.43 | 1075.46 | 1074.89 | 1075.25 |
| 147 | 1099.39 | 1094.36 | 1086.63 | 1085.49 | 1075.37 |
| 148 | 1121.74 | 1117.51 | 1117.19 | 1119.47 | 1111.32 |
| 149 | 1141.15 | 1142.13 | 1142.50 | 1139.06 | 1140.07 |
| 150 | 1141.17 | 1142.23 | 1142.53 | 1139.10 | 1141.80 |
| 151 | 1149.19 | 1149.07 | 1150.64 | 1147.05 | 1141.85 |
| 152 | 1150.88 | 1150.34 | 1152.69 | 1154.87 | 1151.05 |
| 153 | 1172.56 | 1151.70 | 1156.43 | 1160.06 | 1153.05 |
| 154 | 1183.50 | 1170.13 | 1170.31 | 1165.34 | 1167.81 |
| 155 | 1199.98 | 1186.44 | 1181.92 | 1168.12 | 1168.85 |
| 156 | 1206.87 | 1196.38 | 1204.99 | 1189.02 | 1185.97 |

|     |         |         |         |         |         |
|-----|---------|---------|---------|---------|---------|
| 157 | 1207.69 | 1202.42 | 1206.29 | 1202.37 | 1202.98 |
| 158 | 1212.94 | 1205.49 | 1208.27 | 1204.29 | 1207.56 |
| 159 | 1214.27 | 1208.48 | 1211.60 | 1204.58 | 1208.05 |
| 160 | 1219.72 | 1212.05 | 1212.95 | 1207.52 | 1210.36 |
| 161 | 1235.39 | 1212.66 | 1213.03 | 1224.02 | 1214.49 |
| 162 | 1237.99 | 1219.40 | 1224.04 | 1234.39 | 1218.53 |
| 163 | 1239.95 | 1227.08 | 1232.17 | 1238.81 | 1236.19 |
| 164 | 1241.78 | 1238.29 | 1235.95 | 1239.02 | 1236.61 |
| 165 | 1243.13 | 1238.94 | 1239.37 | 1244.20 | 1239.55 |
| 166 | 1243.59 | 1241.82 | 1239.85 | 1244.43 | 1241.56 |
| 167 | 1251.96 | 1242.15 | 1242.51 | 1248.37 | 1242.60 |
| 168 | 1265.37 | 1247.22 | 1243.13 | 1265.03 | 1243.61 |
| 169 | 1280.04 | 1252.12 | 1248.62 | 1272.46 | 1257.77 |
| 170 | 1284.90 | 1267.25 | 1265.14 | 1278.05 | 1267.23 |
| 171 | 1290.14 | 1268.70 | 1271.66 | 1278.43 | 1273.91 |
| 172 | 1307.15 | 1279.96 | 1279.75 | 1289.16 | 1299.83 |
| 173 | 1311.71 | 1280.17 | 1283.13 | 1292.61 | 1299.98 |
| 174 | 1321.06 | 1306.31 | 1300.60 | 1307.35 | 1312.22 |
| 175 | 1329.60 | 1310.89 | 1310.38 | 1309.48 | 1313.02 |
| 176 | 1331.68 | 1313.95 | 1311.98 | 1326.74 | 1324.55 |
| 177 | 1331.74 | 1321.47 | 1321.92 | 1327.51 | 1331.74 |
| 178 | 1334.22 | 1330.19 | 1332.82 | 1328.11 | 1331.77 |
| 179 | 1344.59 | 1332.68 | 1333.01 | 1337.90 | 1334.12 |
| 180 | 1344.63 | 1332.95 | 1337.19 | 1342.62 | 1342.36 |
| 181 | 1348.16 | 1344.89 | 1345.18 | 1343.27 | 1344.72 |
| 182 | 1348.92 | 1344.97 | 1345.22 | 1343.35 | 1344.74 |
| 183 | 1350.83 | 1348.94 | 1346.69 | 1345.29 | 1349.26 |
| 184 | 1352.42 | 1349.14 | 1349.42 | 1348.31 | 1349.44 |
| 185 | 1355.46 | 1355.18 | 1350.21 | 1352.28 | 1354.61 |
| 186 | 1355.61 | 1355.73 | 1356.41 | 1356.56 | 1357.43 |
| 187 | 1380.63 | 1361.20 | 1363.98 | 1366.76 | 1378.75 |
| 188 | 1396.69 | 1362.04 | 1375.09 | 1382.50 | 1381.27 |
| 189 | 1438.50 | 1402.01 | 1412.37 | 1422.98 | 1391.84 |
| 190 | 1440.18 | 1418.56 | 1416.64 | 1423.34 | 1429.37 |
| 191 | 1440.33 | 1421.70 | 1433.11 | 1438.13 | 1435.35 |
| 192 | 1440.61 | 1435.39 | 1436.04 | 1438.50 | 1436.56 |
| 193 | 1440.71 | 1436.06 | 1436.88 | 1438.71 | 1440.17 |
| 194 | 1440.99 | 1440.59 | 1440.57 | 1439.12 | 1440.58 |
| 195 | 1445.74 | 1440.63 | 1440.70 | 1440.28 | 1440.65 |
| 196 | 1450.31 | 1440.88 | 1440.81 | 1440.33 | 1441.79 |
| 197 | 1450.34 | 1441.18 | 1440.99 | 1442.85 | 1449.36 |
| 198 | 1453.90 | 1449.70 | 1447.56 | 1449.04 | 1449.62 |
| 199 | 1460.44 | 1449.84 | 1450.14 | 1449.10 | 1449.79 |
| 200 | 1462.75 | 1456.56 | 1450.19 | 1460.71 | 1456.80 |
| 201 | 1469.65 | 1459.58 | 1451.08 | 1470.69 | 1463.44 |
| 202 | 1502.57 | 1460.53 | 1457.61 | 1477.30 | 1465.42 |
| 203 | 1510.27 | 1464.74 | 1466.52 | 1501.19 | 1468.96 |
| 204 | 1510.32 | 1503.32 | 1503.87 | 1509.27 | 1501.89 |
| 205 | 1512.98 | 1507.38 | 1509.57 | 1510.53 | 1501.94 |
| 206 | 1513.07 | 1509.83 | 1511.92 | 1511.64 | 1508.11 |
| 207 | 1513.65 | 1513.33 | 1512.63 | 1512.76 | 1509.64 |



|     |         |         |         |         |         |
|-----|---------|---------|---------|---------|---------|
| 208 | 1513.69 | 1513.48 | 1512.93 | 1512.89 | 1512.58 |
| 209 | 1515.08 | 1513.64 | 1513.02 | 1513.83 | 1512.83 |
| 210 | 1516.95 | 1513.69 | 1513.73 | 1514.15 | 1513.69 |
| 211 | 1517.05 | 1514.37 | 1513.80 | 1514.16 | 1513.76 |
| 212 | 1518.74 | 1516.64 | 1516.71 | 1516.33 | 1516.88 |
| 213 | 1519.74 | 1516.76 | 1516.73 | 1516.87 | 1516.92 |
| 214 | 1524.23 | 1518.28 | 1517.25 | 1516.92 | 1517.40 |
| 215 | 1525.03 | 1519.77 | 1518.58 | 1519.44 | 1517.91 |
| 216 | 1540.30 | 1520.62 | 1520.33 | 1522.67 | 1519.86 |
| 217 | 1555.13 | 1531.96 | 1546.30 | 1530.22 | 1529.59 |
| 218 | 1557.88 | 1552.45 | 1552.17 | 1536.24 | 1543.74 |
| 219 | 1559.34 | 1553.43 | 1552.34 | 1545.73 | 1549.89 |
| 220 | 1560.26 | 1554.74 | 1554.96 | 1559.35 | 1556.07 |
| 221 | 1587.69 | 1556.28 | 1557.47 | 1559.51 | 1558.17 |
| 222 | 1603.92 | 1560.28 | 1558.82 | 1572.50 | 1559.52 |
| 223 | 1605.83 | 1564.54 | 1559.76 | 1585.25 | 1560.21 |
| 224 | 1621.93 | 1588.50 | 1576.82 | 1590.55 | 1585.13 |
| 225 | 1626.56 | 1602.41 | 1605.87 | 1604.10 | 1597.57 |
| 226 | 1629.18 | 1616.94 | 1615.93 | 1609.91 | 1609.46 |
| 227 | 1629.23 | 1625.32 | 1625.67 | 1622.94 | 1612.66 |
| 228 | 1631.10 | 1626.59 | 1629.11 | 1625.96 | 1621.31 |
| 229 | 1664.06 | 1627.72 | 1629.30 | 1626.07 | 1628.16 |
| 230 | 1664.35 | 1627.92 | 1633.02 | 1628.22 | 1628.33 |
| 231 | 1665.37 | 1662.25 | 1662.84 | 1648.77 | 1654.41 |
| 232 | 1668.77 | 1663.21 | 1664.54 | 1665.98 | 1664.58 |
| 233 | 1670.90 | 1663.27 | 1665.08 | 1666.26 | 1665.35 |
| 234 | 1672.08 | 1669.40 | 1670.08 | 1687.79 | 1685.77 |
| 235 | 3035.52 | 3031.88 | 3033.52 | 3028.63 | 3030.70 |
| 236 | 3035.68 | 3032.18 | 3033.73 | 3028.91 | 3031.12 |
| 237 | 3036.28 | 3036.17 | 3034.38 | 3039.75 | 3034.32 |
| 238 | 3036.50 | 3036.79 | 3035.15 | 3040.08 | 3034.85 |
| 239 | 3043.37 | 3044.08 | 3044.55 | 3040.42 | 3044.05 |
| 240 | 3043.49 | 3044.21 | 3044.62 | 3040.48 | 3044.10 |
| 241 | 3083.89 | 3084.51 | 3090.47 | 3082.17 | 3077.34 |
| 242 | 3083.96 | 3084.55 | 3090.48 | 3082.28 | 3077.46 |
| 243 | 3092.65 | 3093.05 | 3090.96 | 3098.27 | 3090.95 |
| 244 | 3092.80 | 3093.19 | 3091.13 | 3098.31 | 3091.21 |
| 245 | 3101.05 | 3102.21 | 3102.62 | 3099.88 | 3101.76 |
| 246 | 3101.08 | 3102.23 | 3102.64 | 3100.18 | 3101.77 |
| 247 | 3119.41 | 3117.19 | 3119.84 | 3110.54 | 3120.08 |
| 248 | 3119.57 | 3117.36 | 3120.01 | 3110.71 | 3120.47 |
| 249 | 3120.98 | 3121.52 | 3120.06 | 3126.28 | 3123.34 |
| 250 | 3121.56 | 3122.12 | 3120.20 | 3126.31 | 3123.59 |
| 251 | 3127.74 | 3129.41 | 3129.55 | 3131.51 | 3128.56 |
| 252 | 3127.75 | 3129.43 | 3129.57 | 3132.86 | 3128.57 |
| 253 | 3172.17 | 3176.75 | 3174.87 | 3169.12 | 3175.61 |
| 254 | 3172.27 | 3177.01 | 3175.02 | 3169.23 | 3175.67 |
| 255 | 3176.06 | 3177.82 | 3175.83 | 3179.31 | 3176.69 |
| 256 | 3176.45 | 3178.12 | 3176.29 | 3179.50 | 3177.40 |
| 257 | 3177.27 | 3182.44 | 3183.85 | 3180.74 | 3185.74 |
| 258 | 3177.76 | 3182.76 | 3184.49 | 3180.77 | 3185.77 |

|     |         |         |         |         |         |
|-----|---------|---------|---------|---------|---------|
| 259 | 3184.37 | 3186.63 | 3187.21 | 3189.22 | 3186.28 |
| 260 | 3184.44 | 3186.72 | 3187.22 | 3192.49 | 3186.35 |
| 261 | 3184.90 | 3187.20 | 3187.68 | 3192.75 | 3188.25 |
| 262 | 3185.00 | 3187.28 | 3187.78 | 3194.96 | 3188.33 |
| 263 | 3201.09 | 3199.77 | 3202.91 | 3196.01 | 3198.19 |
| 264 | 3209.16 | 3209.45 | 3210.50 | 3207.23 | 3211.11 |
| 265 | 3209.17 | 3209.74 | 3210.92 | 3207.28 | 3211.13 |
| 266 | 3210.87 | 3211.34 | 3211.60 | 3208.66 | 3212.76 |
| 267 | 3210.94 | 3211.36 | 3211.63 | 3209.28 | 3212.79 |
| 268 | 3210.97 | 3211.54 | 3211.87 | 3209.32 | 3213.04 |
| 269 | 3211.01 | 3211.73 | 3212.39 | 3224.59 | 3213.89 |
| 270 | 3212.62 | 3212.95 | 3213.19 | 3225.99 | 3215.24 |
| 271 | 3212.83 | 3212.98 | 3213.24 | 3227.94 | 3216.06 |
| 272 | 3221.24 | 3221.97 | 3225.18 | 3228.01 | 3218.12 |
| 273 | 3237.15 | 3238.82 | 3239.15 | 3236.43 | 3243.55 |
| 274 | 3237.37 | 3238.91 | 3239.35 | 3236.96 | 3243.77 |
| 275 | 3261.19 | 3262.17 | 3253.95 | 3249.05 | 3253.83 |
| 276 | 3261.23 | 3262.60 | 3254.03 | 3249.54 | 3253.91 |

**Table S26** Vibration frequencies of TTABN in the solid phase at B3LYP/6-31G(d) by (TDA)-DFT.

| No. | S <sub>0</sub> | S <sub>1</sub> | T <sub>1</sub> | T <sub>2</sub> | T <sub>3</sub> |
|-----|----------------|----------------|----------------|----------------|----------------|
| 1   | 63.46          | 65.23          | 65.51          | 63.74          | 64.47          |
| 2   | 67.12          | 66.83          | 66.86          | 66.87          | 66.99          |
| 3   | 70.62          | 71.36          | 72.59          | 72.46          | 72.75          |
| 4   | 74.27          | 74.44          | 75.36          | 74.33          | 75.37          |
| 5   | 75.48          | 76.49          | 76.25          | 80.77          | 78.15          |
| 6   | 82.52          | 83.81          | 83.98          | 83.33          | 83.91          |
| 7   | 85.24          | 86.70          | 86.19          | 85.40          | 86.62          |
| 8   | 90.01          | 91.44          | 91.51          | 89.37          | 91.59          |
| 9   | 96.08          | 96.64          | 96.50          | 96.08          | 97.11          |
| 10  | 100.72         | 99.75          | 99.61          | 101.23         | 102.13         |
| 11  | 106.29         | 107.38         | 106.08         | 104.45         | 105.23         |
| 12  | 109.07         | 112.52         | 112.24         | 108.76         | 111.31         |
| 13  | 113.17         | 113.89         | 113.41         | 110.51         | 113.72         |
| 14  | 115.57         | 117.68         | 117.60         | 116.69         | 118.10         |
| 15  | 119.73         | 120.45         | 120.05         | 119.74         | 122.35         |
| 16  | 121.67         | 121.50         | 121.77         | 121.53         | 122.86         |
| 17  | 125.84         | 125.21         | 125.70         | 127.66         | 126.38         |
| 18  | 131.27         | 130.38         | 129.96         | 131.13         | 132.21         |
| 19  | 135.99         | 132.88         | 134.03         | 137.64         | 136.28         |
| 20  | 138.80         | 138.54         | 138.61         | 140.53         | 139.38         |
| 21  | 140.88         | 147.98         | 146.35         | 141.43         | 146.17         |
| 22  | 157.10         | 157.49         | 156.86         | 153.04         | 155.19         |
| 23  | 168.13         | 168.40         | 167.58         | 168.98         | 169.31         |
| 24  | 174.83         | 176.41         | 176.28         | 174.91         | 177.86         |
| 25  | 177.49         | 182.08         | 180.29         | 176.16         | 182.26         |

|    |        |        |        |        |        |
|----|--------|--------|--------|--------|--------|
| 26 | 183.10 | 183.19 | 182.53 | 181.89 | 183.00 |
| 27 | 189.83 | 189.21 | 188.32 | 188.75 | 190.95 |
| 28 | 194.01 | 202.29 | 199.05 | 200.92 | 204.82 |
| 29 | 204.60 | 204.05 | 203.77 | 203.73 | 207.80 |
| 30 | 209.32 | 207.23 | 207.07 | 204.32 | 209.99 |
| 31 | 217.96 | 215.92 | 215.73 | 218.09 | 217.10 |
| 32 | 226.12 | 225.35 | 226.10 | 224.98 | 226.60 |
| 33 | 233.15 | 228.62 | 229.92 | 230.96 | 230.86 |
| 34 | 237.23 | 237.69 | 239.06 | 239.04 | 239.28 |
| 35 | 249.06 | 250.92 | 252.76 | 251.15 | 252.12 |
| 36 | 262.99 | 261.94 | 262.59 | 265.78 | 263.89 |
| 37 | 275.15 | 264.96 | 265.31 | 272.44 | 269.36 |
| 38 | 285.53 | 279.57 | 281.22 | 282.86 | 282.34 |
| 39 | 315.66 | 311.41 | 312.20 | 313.96 | 311.97 |
| 40 | 321.59 | 320.01 | 319.55 | 321.08 | 319.27 |
| 41 | 327.20 | 325.80 | 326.68 | 326.40 | 325.67 |
| 42 | 339.38 | 331.38 | 332.84 | 337.83 | 332.25 |
| 43 | 342.73 | 341.90 | 341.43 | 342.73 | 342.66 |
| 44 | 353.09 | 351.81 | 351.05 | 348.04 | 350.60 |
| 45 | 353.90 | 352.05 | 351.74 | 353.59 | 351.68 |
| 46 | 361.29 | 360.88 | 360.88 | 358.02 | 355.76 |
| 47 | 366.42 | 366.44 | 365.76 | 363.01 | 362.87 |
| 48 | 367.99 | 368.99 | 367.54 | 365.05 | 364.84 |
| 49 | 386.27 | 385.37 | 385.34 | 385.04 | 385.55 |
| 50 | 399.30 | 395.85 | 396.21 | 394.82 | 390.77 |
| 51 | 421.32 | 403.68 | 403.96 | 405.52 | 400.51 |
| 52 | 427.22 | 422.39 | 421.22 | 424.01 | 419.36 |
| 53 | 430.89 | 427.23 | 427.81 | 429.71 | 425.43 |
| 54 | 436.21 | 429.73 | 429.39 | 430.99 | 428.61 |
| 55 | 439.91 | 433.95 | 434.22 | 432.91 | 433.37 |
| 56 | 440.92 | 439.69 | 439.36 | 434.94 | 436.71 |
| 57 | 443.53 | 440.02 | 439.89 | 437.62 | 441.35 |
| 58 | 449.87 | 446.00 | 446.21 | 447.63 | 445.80 |
| 59 | 458.24 | 453.82 | 452.98 | 451.79 | 455.85 |
| 60 | 461.06 | 459.32 | 458.95 | 453.50 | 459.03 |
| 61 | 468.48 | 468.37 | 465.43 | 477.09 | 473.00 |
| 62 | 496.45 | 488.17 | 492.17 | 484.38 | 482.98 |
| 63 | 500.89 | 496.70 | 496.16 | 503.19 | 500.95 |
| 64 | 521.45 | 517.23 | 516.41 | 515.87 | 520.74 |
| 65 | 526.29 | 523.70 | 522.93 | 521.94 | 523.64 |
| 66 | 536.20 | 531.43 | 532.08 | 528.80 | 533.84 |
| 67 | 540.51 | 537.13 | 535.91 | 535.41 | 538.98 |
| 68 | 557.02 | 548.18 | 548.68 | 541.68 | 552.33 |
| 69 | 574.62 | 558.30 | 557.51 | 569.24 | 571.50 |
| 70 | 576.18 | 574.08 | 574.30 | 570.87 | 573.92 |
| 71 | 577.98 | 579.69 | 579.70 | 575.50 | 579.22 |
| 72 | 597.87 | 588.84 | 588.94 | 585.13 | 594.57 |
| 73 | 607.47 | 593.30 | 593.48 | 592.64 | 598.21 |
| 74 | 617.58 | 605.52 | 605.80 | 594.08 | 605.52 |
| 75 | 625.35 | 610.78 | 612.24 | 605.59 | 607.45 |
| 76 | 637.48 | 614.77 | 616.55 | 609.79 | 618.94 |

|     |        |        |        |        |        |
|-----|--------|--------|--------|--------|--------|
| 77  | 641.39 | 619.90 | 620.52 | 614.14 | 622.54 |
| 78  | 656.32 | 625.80 | 623.71 | 619.39 | 628.47 |
| 79  | 660.17 | 655.96 | 655.79 | 651.27 | 648.23 |
| 80  | 664.64 | 658.66 | 656.48 | 660.98 | 654.18 |
| 81  | 666.20 | 662.82 | 663.36 | 662.35 | 662.51 |
| 82  | 668.67 | 664.19 | 664.18 | 666.10 | 663.10 |
| 83  | 670.03 | 666.36 | 667.26 | 666.82 | 666.64 |
| 84  | 685.52 | 675.81 | 675.51 | 679.35 | 672.07 |
| 85  | 715.96 | 704.68 | 704.16 | 707.60 | 709.26 |
| 86  | 717.41 | 707.01 | 704.54 | 716.89 | 714.80 |
| 87  | 730.89 | 715.58 | 722.82 | 718.81 | 721.19 |
| 88  | 736.35 | 729.88 | 729.69 | 723.15 | 726.73 |
| 89  | 748.49 | 732.64 | 732.13 | 727.65 | 730.19 |
| 90  | 753.16 | 742.74 | 743.43 | 745.46 | 734.45 |
| 91  | 758.28 | 744.93 | 745.29 | 748.18 | 746.07 |
| 92  | 761.31 | 754.43 | 754.11 | 758.00 | 754.60 |
| 93  | 797.79 | 765.28 | 768.74 | 776.05 | 768.90 |
| 94  | 798.39 | 791.43 | 787.14 | 791.68 | 791.83 |
| 95  | 802.69 | 797.60 | 797.00 | 796.44 | 795.92 |
| 96  | 807.61 | 801.27 | 801.98 | 800.01 | 801.61 |
| 97  | 813.80 | 806.32 | 803.73 | 803.42 | 805.18 |
| 98  | 822.93 | 811.99 | 812.22 | 806.59 | 808.56 |
| 99  | 828.89 | 812.71 | 814.98 | 814.19 | 812.20 |
| 100 | 830.90 | 818.90 | 819.39 | 821.14 | 821.43 |
| 101 | 836.49 | 828.22 | 833.92 | 823.58 | 827.04 |
| 102 | 840.51 | 833.43 | 838.37 | 828.53 | 833.48 |
| 103 | 841.10 | 836.00 | 842.09 | 831.14 | 836.14 |
| 104 | 842.68 | 838.32 | 844.92 | 834.98 | 838.38 |
| 105 | 844.37 | 845.02 | 851.01 | 839.65 | 841.13 |
| 106 | 849.80 | 846.07 | 853.14 | 845.15 | 845.93 |
| 107 | 856.24 | 852.31 | 856.91 | 848.72 | 853.23 |
| 108 | 858.73 | 856.27 | 861.42 | 850.68 | 854.76 |
| 109 | 862.73 | 861.26 | 869.24 | 856.15 | 856.15 |
| 110 | 871.84 | 871.50 | 871.54 | 858.02 | 862.40 |
| 111 | 880.69 | 877.23 | 879.19 | 878.48 | 866.24 |
| 112 | 915.43 | 877.65 | 880.96 | 896.65 | 877.90 |
| 113 | 925.91 | 894.27 | 899.06 | 904.30 | 887.21 |
| 114 | 930.77 | 906.80 | 909.65 | 916.55 | 899.35 |
| 115 | 942.17 | 911.09 | 914.45 | 922.29 | 908.26 |
| 116 | 948.17 | 914.92 | 918.73 | 925.08 | 912.92 |
| 117 | 954.03 | 920.60 | 920.39 | 930.87 | 920.49 |
| 118 | 958.08 | 933.74 | 936.20 | 941.01 | 936.69 |
| 119 | 963.17 | 945.08 | 943.71 | 942.00 | 942.62 |
| 120 | 964.33 | 953.01 | 958.75 | 957.46 | 957.36 |
| 121 | 965.71 | 958.45 | 959.77 | 959.52 | 961.38 |
| 122 | 967.13 | 962.25 | 962.85 | 962.63 | 962.60 |
| 123 | 970.52 | 966.11 | 966.34 | 969.91 | 966.95 |
| 124 | 977.32 | 966.52 | 967.58 | 972.91 | 968.82 |
| 125 | 978.91 | 976.09 | 977.63 | 975.01 | 969.81 |
| 126 | 982.41 | 979.75 | 979.21 | 977.64 | 976.49 |
| 127 | 986.86 | 980.70 | 981.04 | 983.71 | 977.99 |

|     |         |         |         |         |         |
|-----|---------|---------|---------|---------|---------|
| 128 | 995.82  | 986.90  | 983.58  | 990.20  | 979.77  |
| 129 | 1005.10 | 999.84  | 1000.83 | 1001.18 | 998.95  |
| 130 | 1022.64 | 1022.11 | 1022.09 | 1020.54 | 1004.98 |
| 131 | 1023.37 | 1023.17 | 1023.17 | 1022.39 | 1021.05 |
| 132 | 1027.13 | 1026.86 | 1026.30 | 1026.12 | 1022.83 |
| 133 | 1027.71 | 1027.29 | 1026.63 | 1027.45 | 1025.84 |
| 134 | 1035.23 | 1029.43 | 1027.44 | 1030.81 | 1027.36 |
| 135 | 1042.89 | 1039.69 | 1038.78 | 1031.92 | 1031.71 |
| 136 | 1044.56 | 1042.05 | 1041.21 | 1036.15 | 1038.96 |
| 137 | 1048.48 | 1046.58 | 1046.27 | 1039.86 | 1047.13 |
| 138 | 1052.25 | 1050.04 | 1050.57 | 1047.55 | 1051.56 |
| 139 | 1053.48 | 1051.45 | 1051.67 | 1052.14 | 1052.58 |
| 140 | 1077.99 | 1072.95 | 1068.88 | 1052.80 | 1063.27 |
| 141 | 1080.80 | 1075.71 | 1073.68 | 1076.66 | 1065.27 |
| 142 | 1083.39 | 1076.63 | 1074.68 | 1080.88 | 1069.82 |
| 143 | 1083.87 | 1081.14 | 1080.73 | 1081.66 | 1070.69 |
| 144 | 1084.05 | 1082.96 | 1083.42 | 1083.74 | 1078.76 |
| 145 | 1086.46 | 1084.70 | 1085.89 | 1084.86 | 1083.59 |
| 146 | 1087.59 | 1087.61 | 1087.72 | 1085.15 | 1085.62 |
| 147 | 1102.64 | 1099.66 | 1090.35 | 1090.55 | 1086.36 |
| 148 | 1122.88 | 1118.12 | 1118.09 | 1120.32 | 1113.36 |
| 149 | 1147.55 | 1146.77 | 1148.24 | 1131.73 | 1147.44 |
| 150 | 1148.49 | 1147.73 | 1148.49 | 1146.07 | 1149.16 |
| 151 | 1153.33 | 1148.42 | 1153.69 | 1151.20 | 1150.22 |
| 152 | 1164.77 | 1152.81 | 1157.21 | 1153.32 | 1153.24 |
| 153 | 1176.61 | 1164.60 | 1164.61 | 1166.75 | 1166.09 |
| 154 | 1188.52 | 1174.68 | 1175.39 | 1169.86 | 1171.09 |
| 155 | 1200.89 | 1179.03 | 1182.05 | 1188.93 | 1184.46 |
| 156 | 1214.08 | 1187.94 | 1198.43 | 1193.20 | 1191.33 |
| 157 | 1214.78 | 1202.79 | 1208.07 | 1204.34 | 1202.39 |
| 158 | 1216.34 | 1208.97 | 1211.14 | 1209.69 | 1212.35 |
| 159 | 1218.86 | 1214.52 | 1215.95 | 1215.69 | 1216.03 |
| 160 | 1232.29 | 1215.74 | 1217.83 | 1219.81 | 1217.44 |
| 161 | 1239.83 | 1219.26 | 1222.01 | 1228.89 | 1218.58 |
| 162 | 1241.96 | 1221.89 | 1229.94 | 1231.28 | 1232.97 |
| 163 | 1243.27 | 1234.18 | 1235.98 | 1240.99 | 1238.88 |
| 164 | 1245.01 | 1241.94 | 1236.14 | 1242.84 | 1241.50 |
| 165 | 1248.82 | 1242.02 | 1241.96 | 1244.75 | 1242.39 |
| 166 | 1253.63 | 1245.79 | 1242.91 | 1247.89 | 1243.89 |
| 167 | 1258.08 | 1249.99 | 1247.74 | 1252.63 | 1248.36 |
| 168 | 1271.09 | 1253.63 | 1249.19 | 1254.92 | 1253.78 |
| 169 | 1283.57 | 1253.78 | 1253.78 | 1271.05 | 1259.73 |
| 170 | 1285.98 | 1268.64 | 1266.40 | 1277.52 | 1270.03 |
| 171 | 1294.94 | 1273.69 | 1272.08 | 1279.46 | 1278.14 |
| 172 | 1309.48 | 1281.40 | 1281.54 | 1285.87 | 1294.96 |
| 173 | 1311.89 | 1287.54 | 1282.68 | 1292.29 | 1295.50 |
| 174 | 1319.14 | 1309.62 | 1305.87 | 1296.55 | 1300.29 |
| 175 | 1328.22 | 1311.05 | 1309.35 | 1303.39 | 1328.13 |
| 176 | 1335.84 | 1321.01 | 1312.78 | 1323.73 | 1331.69 |
| 177 | 1337.26 | 1324.29 | 1321.56 | 1332.91 | 1333.94 |
| 178 | 1342.04 | 1335.46 | 1335.53 | 1338.28 | 1336.01 |

|     |         |         |         |         |         |
|-----|---------|---------|---------|---------|---------|
| 179 | 1347.72 | 1337.45 | 1337.04 | 1340.23 | 1342.59 |
| 180 | 1348.05 | 1342.99 | 1343.29 | 1342.53 | 1347.83 |
| 181 | 1349.25 | 1347.66 | 1348.23 | 1347.13 | 1349.36 |
| 182 | 1351.16 | 1350.88 | 1349.33 | 1347.93 | 1352.19 |
| 183 | 1353.02 | 1351.04 | 1350.83 | 1352.24 | 1354.90 |
| 184 | 1354.49 | 1353.92 | 1353.71 | 1357.78 | 1357.62 |
| 185 | 1358.18 | 1356.40 | 1356.42 | 1359.23 | 1363.19 |
| 186 | 1363.78 | 1361.22 | 1361.41 | 1364.46 | 1370.32 |
| 187 | 1381.62 | 1365.96 | 1365.41 | 1370.99 | 1372.63 |
| 188 | 1396.85 | 1367.33 | 1379.61 | 1384.89 | 1378.61 |
| 189 | 1440.85 | 1404.35 | 1411.47 | 1413.78 | 1404.44 |
| 190 | 1444.68 | 1420.03 | 1420.38 | 1417.39 | 1432.05 |
| 191 | 1445.70 | 1423.70 | 1437.18 | 1434.85 | 1439.29 |
| 192 | 1446.94 | 1440.39 | 1440.27 | 1443.15 | 1440.67 |
| 193 | 1447.66 | 1442.46 | 1441.84 | 1443.50 | 1442.89 |
| 194 | 1449.08 | 1444.44 | 1444.70 | 1445.85 | 1444.02 |
| 195 | 1453.26 | 1446.56 | 1446.83 | 1446.84 | 1446.78 |
| 196 | 1454.53 | 1447.73 | 1447.80 | 1447.09 | 1447.29 |
| 197 | 1457.28 | 1453.13 | 1448.35 | 1452.99 | 1452.77 |
| 198 | 1459.41 | 1453.54 | 1450.37 | 1453.65 | 1453.65 |
| 199 | 1464.20 | 1457.37 | 1453.59 | 1458.85 | 1455.51 |
| 200 | 1465.75 | 1460.26 | 1454.10 | 1462.25 | 1459.52 |
| 201 | 1475.21 | 1465.62 | 1460.00 | 1470.20 | 1463.90 |
| 202 | 1505.97 | 1466.61 | 1461.10 | 1479.98 | 1468.82 |
| 203 | 1515.30 | 1469.44 | 1466.93 | 1499.88 | 1481.29 |
| 204 | 1517.93 | 1507.43 | 1504.47 | 1514.96 | 1511.09 |
| 205 | 1524.96 | 1517.61 | 1517.66 | 1523.19 | 1516.51 |
| 206 | 1525.09 | 1521.85 | 1520.24 | 1524.21 | 1516.56 |
| 207 | 1525.55 | 1523.40 | 1522.91 | 1524.80 | 1519.60 |
| 208 | 1527.27 | 1524.33 | 1524.62 | 1524.92 | 1521.16 |
| 209 | 1528.11 | 1525.31 | 1525.64 | 1525.25 | 1524.82 |
| 210 | 1528.46 | 1526.43 | 1525.90 | 1528.14 | 1525.18 |
| 211 | 1528.94 | 1526.59 | 1526.66 | 1528.43 | 1526.73 |
| 212 | 1530.63 | 1527.67 | 1528.25 | 1528.87 | 1527.12 |
| 213 | 1537.44 | 1528.31 | 1528.60 | 1529.70 | 1527.19 |
| 214 | 1540.84 | 1531.42 | 1533.15 | 1531.66 | 1528.90 |
| 215 | 1541.10 | 1537.47 | 1537.66 | 1533.71 | 1536.13 |
| 216 | 1542.69 | 1538.71 | 1539.90 | 1535.66 | 1537.50 |
| 217 | 1557.39 | 1539.40 | 1547.64 | 1541.57 | 1540.78 |
| 218 | 1563.31 | 1555.08 | 1549.94 | 1543.00 | 1545.69 |
| 219 | 1567.05 | 1557.90 | 1556.33 | 1553.58 | 1548.38 |
| 220 | 1567.94 | 1560.05 | 1559.07 | 1562.52 | 1560.79 |
| 221 | 1591.79 | 1560.74 | 1563.04 | 1564.28 | 1561.92 |
| 222 | 1608.03 | 1568.20 | 1563.67 | 1572.39 | 1564.72 |
| 223 | 1612.88 | 1572.25 | 1567.44 | 1586.01 | 1578.17 |
| 224 | 1625.88 | 1594.78 | 1583.48 | 1599.98 | 1598.60 |
| 225 | 1631.84 | 1606.05 | 1606.43 | 1604.04 | 1609.02 |
| 226 | 1632.33 | 1620.10 | 1621.18 | 1612.39 | 1616.15 |
| 227 | 1636.32 | 1622.60 | 1629.83 | 1618.71 | 1616.59 |
| 228 | 1640.24 | 1627.89 | 1631.45 | 1628.21 | 1629.94 |
| 229 | 1663.17 | 1628.51 | 1632.90 | 1629.50 | 1634.05 |

|     |         |         |         |         |         |
|-----|---------|---------|---------|---------|---------|
| 230 | 1668.12 | 1631.24 | 1635.20 | 1635.28 | 1634.45 |
| 231 | 1668.64 | 1660.40 | 1666.14 | 1648.47 | 1646.63 |
| 232 | 1672.74 | 1664.86 | 1668.70 | 1654.88 | 1668.34 |
| 233 | 1676.49 | 1665.87 | 1672.28 | 1669.98 | 1672.42 |
| 234 | 1678.08 | 1673.89 | 1673.90 | 1675.31 | 1782.01 |
| 235 | 3038.65 | 3035.63 | 3037.88 | 3033.65 | 3031.00 |
| 236 | 3043.36 | 3040.61 | 3042.77 | 3039.34 | 3037.23 |
| 237 | 3044.02 | 3044.27 | 3042.86 | 3045.77 | 3042.80 |
| 238 | 3046.39 | 3047.05 | 3047.22 | 3046.39 | 3046.54 |
| 239 | 3049.34 | 3047.71 | 3050.21 | 3048.86 | 3049.44 |
| 240 | 3075.30 | 3076.59 | 3075.67 | 3079.26 | 3076.08 |
| 241 | 3087.75 | 3083.31 | 3086.54 | 3081.11 | 3076.70 |
| 242 | 3092.87 | 3090.05 | 3092.29 | 3088.95 | 3084.67 |
| 243 | 3095.42 | 3094.38 | 3093.23 | 3096.26 | 3091.95 |
| 244 | 3107.82 | 3103.61 | 3108.46 | 3104.69 | 3107.31 |
| 245 | 3108.39 | 3107.91 | 3108.64 | 3106.55 | 3107.65 |
| 246 | 3119.84 | 3121.31 | 3123.46 | 3116.40 | 3125.21 |
| 247 | 3121.59 | 3123.90 | 3126.12 | 3117.04 | 3125.88 |
| 248 | 3130.89 | 3132.35 | 3130.85 | 3134.38 | 3130.97 |
| 249 | 3131.21 | 3133.07 | 3131.09 | 3134.45 | 3131.41 |
| 250 | 3136.64 | 3136.30 | 3137.03 | 3134.62 | 3136.27 |
| 251 | 3146.99 | 3147.05 | 3148.36 | 3144.15 | 3146.78 |
| 252 | 3147.06 | 3149.37 | 3148.46 | 3157.27 | 3150.19 |
| 253 | 3176.62 | 3181.23 | 3181.70 | 3176.33 | 3179.99 |
| 254 | 3179.65 | 3184.87 | 3182.44 | 3176.86 | 3183.34 |
| 255 | 3183.37 | 3185.48 | 3182.77 | 3188.51 | 3185.72 |
| 256 | 3183.69 | 3186.40 | 3188.89 | 3189.89 | 3188.01 |
| 257 | 3194.48 | 3194.01 | 3194.59 | 3192.94 | 3193.07 |
| 258 | 3205.89 | 3200.09 | 3202.47 | 3200.92 | 3202.12 |
| 259 | 3206.03 | 3203.10 | 3203.12 | 3211.00 | 3210.72 |
| 260 | 3215.19 | 3216.22 | 3215.54 | 3212.33 | 3216.45 |
| 261 | 3216.52 | 3216.94 | 3217.79 | 3220.44 | 3217.54 |
| 262 | 3218.12 | 3218.31 | 3220.68 | 3221.58 | 3218.07 |
| 263 | 3221.26 | 3223.47 | 3223.19 | 3221.79 | 3228.16 |
| 264 | 3223.41 | 3224.21 | 3223.34 | 3230.06 | 3228.72 |
| 265 | 3225.17 | 3226.65 | 3230.00 | 3231.65 | 3229.40 |
| 266 | 3232.76 | 3229.22 | 3230.63 | 3236.54 | 3234.18 |
| 267 | 3236.10 | 3233.79 | 3233.95 | 3240.08 | 3238.97 |
| 268 | 3239.69 | 3238.97 | 3241.13 | 3241.41 | 3241.53 |
| 269 | 3241.95 | 3245.67 | 3246.20 | 3241.72 | 3245.60 |
| 270 | 3242.04 | 3247.88 | 3250.71 | 3246.65 | 3254.81 |
| 271 | 3261.88 | 3259.70 | 3259.25 | 3255.44 | 3259.45 |
| 272 | 3262.42 | 3261.72 | 3260.48 | 3261.76 | 3262.59 |
| 273 | 3266.21 | 3268.19 | 3261.15 | 3270.51 | 3265.11 |
| 274 | 3282.68 | 3270.38 | 3274.48 | 3271.82 | 3275.97 |
| 275 | 3283.96 | 3281.92 | 3276.63 | 3277.71 | 3276.40 |
| 276 | 3343.38 | 3338.68 | 3344.89 | 3340.49 | 3344.94 |

**Table S27.** Vibration frequencies of TAzBN in toluene at B3LYP/6-31G(d) by (TDA)-DFT.

| No. | S <sub>0</sub> | S <sub>1</sub> | T <sub>1</sub> | T <sub>2</sub> | T <sub>3</sub> |
|-----|----------------|----------------|----------------|----------------|----------------|
| 1   | 18.05          | 15.96          | 10.24          | 12.84          | 10.05          |
| 2   | 22.04          | 22.44          | 20.15          | 16.34          | 13.84          |
| 3   | 24.23          | 24.89          | 24.00          | 24.33          | 22.89          |
| 4   | 30.04          | 33.92          | 34.16          | 30.06          | 27.52          |
| 5   | 40.61          | 40.21          | 40.29          | 36.30          | 32.65          |
| 6   | 48.10          | 49.02          | 49.54          | 50.32          | 47.88          |
| 7   | 51.55          | 50.95          | 50.96          | 52.32          | 50.10          |
| 8   | 56.51          | 55.25          | 54.84          | 55.17          | 54.65          |
| 9   | 59.24          | 57.79          | 57.00          | 61.41          | 57.05          |
| 10  | 67.42          | 68.96          | 68.39          | 63.78          | 68.25          |
| 11  | 83.85          | 83.02          | 82.44          | 84.49          | 82.62          |
| 12  | 88.65          | 92.29          | 91.92          | 89.09          | 88.40          |
| 13  | 101.55         | 101.31         | 100.85         | 101.97         | 100.10         |
| 14  | 107.13         | 102.53         | 103.32         | 105.57         | 105.15         |
| 15  | 131.54         | 130.02         | 130.13         | 124.28         | 122.60         |
| 16  | 145.10         | 142.51         | 142.29         | 138.26         | 140.21         |
| 17  | 150.49         | 149.79         | 149.51         | 143.58         | 143.74         |
| 18  | 152.74         | 153.21         | 152.55         | 153.79         | 155.02         |
| 19  | 164.26         | 165.64         | 164.41         | 164.30         | 163.15         |
| 20  | 181.11         | 180.85         | 180.17         | 179.35         | 167.96         |
| 21  | 195.56         | 193.37         | 194.06         | 189.51         | 189.39         |
| 22  | 197.59         | 195.46         | 195.82         | 196.52         | 202.68         |
| 23  | 219.48         | 207.96         | 208.30         | 209.81         | 208.41         |
| 24  | 232.12         | 227.02         | 227.11         | 221.81         | 219.11         |
| 25  | 238.21         | 228.23         | 229.08         | 225.79         | 225.73         |
| 26  | 251.16         | 248.13         | 248.75         | 243.36         | 249.64         |
| 27  | 259.76         | 255.77         | 256.44         | 253.58         | 251.85         |
| 28  | 281.43         | 281.64         | 281.66         | 280.16         | 276.31         |
| 29  | 296.47         | 292.36         | 290.75         | 288.31         | 283.94         |
| 30  | 299.21         | 295.24         | 296.86         | 298.62         | 286.99         |
| 31  | 307.35         | 306.50         | 306.92         | 303.78         | 302.62         |
| 32  | 322.36         | 321.78         | 322.57         | 321.69         | 321.27         |
| 33  | 325.06         | 323.73         | 324.62         | 323.49         | 324.91         |
| 34  | 335.14         | 332.42         | 331.65         | 335.68         | 338.98         |
| 35  | 345.12         | 340.59         | 341.91         | 343.14         | 341.39         |
| 36  | 355.64         | 350.64         | 350.73         | 354.46         | 352.00         |
| 37  | 359.51         | 357.14         | 356.87         | 358.93         | 363.93         |
| 38  | 369.28         | 369.45         | 369.38         | 365.69         | 372.54         |
| 39  | 378.62         | 374.46         | 374.11         | 378.71         | 373.49         |
| 40  | 394.98         | 390.78         | 386.80         | 390.91         | 389.80         |
| 41  | 407.22         | 398.54         | 399.54         | 401.37         | 401.32         |
| 42  | 433.00         | 415.69         | 416.07         | 411.66         | 420.56         |
| 43  | 445.81         | 441.78         | 443.04         | 438.76         | 437.17         |
| 44  | 448.84         | 445.45         | 445.95         | 440.80         | 439.63         |
| 45  | 451.16         | 449.60         | 448.78         | 450.07         | 450.73         |
| 46  | 470.98         | 470.20         | 470.85         | 462.76         | 464.01         |
| 47  | 476.59         | 473.72         | 474.23         | 470.41         | 469.11         |
| 48  | 479.44         | 477.20         | 477.54         | 475.35         | 475.77         |
| 49  | 491.25         | 484.25         | 485.52         | 482.43         | 479.46         |
| 50  | 495.30         | 489.71         | 490.36         | 487.45         | 485.96         |



|     |        |        |        |        |        |
|-----|--------|--------|--------|--------|--------|
| 51  | 497.41 | 491.82 | 491.96 | 490.38 | 488.93 |
| 52  | 508.10 | 505.50 | 505.40 | 499.76 | 500.75 |
| 53  | 520.73 | 516.34 | 520.32 | 515.88 | 512.99 |
| 54  | 529.94 | 527.54 | 527.08 | 525.97 | 524.90 |
| 55  | 536.84 | 531.15 | 528.79 | 533.45 | 527.63 |
| 56  | 545.59 | 534.49 | 533.34 | 534.57 | 528.57 |
| 57  | 551.53 | 537.88 | 536.55 | 541.25 | 535.94 |
| 58  | 557.82 | 553.79 | 554.12 | 550.50 | 543.99 |
| 59  | 564.52 | 556.90 | 556.91 | 556.34 | 548.58 |
| 60  | 570.50 | 561.06 | 559.27 | 557.88 | 561.96 |
| 61  | 580.45 | 570.54 | 568.90 | 559.47 | 568.10 |
| 62  | 583.36 | 576.91 | 574.83 | 570.66 | 572.90 |
| 63  | 589.46 | 578.12 | 578.39 | 576.57 | 580.29 |
| 64  | 594.83 | 587.31 | 587.51 | 581.77 | 583.50 |
| 65  | 603.62 | 596.94 | 597.62 | 587.01 | 600.13 |
| 66  | 609.71 | 601.87 | 601.65 | 600.38 | 602.57 |
| 67  | 625.14 | 610.68 | 610.03 | 602.88 | 606.96 |
| 68  | 634.53 | 612.75 | 612.12 | 607.58 | 615.70 |
| 69  | 641.12 | 618.44 | 616.01 | 616.11 | 623.65 |
| 70  | 647.10 | 631.49 | 629.77 | 634.74 | 637.70 |
| 71  | 656.62 | 644.36 | 642.16 | 645.51 | 646.05 |
| 72  | 660.66 | 651.90 | 651.26 | 648.51 | 650.62 |
| 73  | 665.45 | 659.78 | 656.81 | 653.63 | 661.90 |
| 74  | 691.22 | 682.05 | 676.95 | 684.92 | 681.89 |
| 75  | 698.09 | 696.00 | 693.74 | 689.70 | 697.23 |
| 76  | 702.57 | 696.55 | 695.69 | 716.22 | 698.09 |
| 77  | 731.35 | 720.70 | 725.07 | 723.64 | 725.44 |
| 78  | 736.02 | 730.67 | 730.67 | 729.83 | 732.89 |
| 79  | 751.45 | 735.06 | 735.26 | 735.68 | 735.76 |
| 80  | 757.96 | 746.20 | 747.33 | 745.53 | 741.87 |
| 81  | 763.16 | 750.86 | 754.74 | 751.78 | 747.13 |
| 82  | 764.25 | 756.37 | 758.48 | 759.84 | 757.29 |
| 83  | 768.06 | 757.82 | 760.87 | 760.31 | 758.94 |
| 84  | 769.89 | 764.02 | 764.30 | 762.36 | 761.50 |
| 85  | 772.09 | 766.49 | 767.59 | 766.55 | 766.07 |
| 86  | 773.60 | 770.75 | 770.69 | 769.58 | 769.05 |
| 87  | 784.29 | 774.10 | 775.51 | 775.98 | 775.01 |
| 88  | 786.75 | 777.43 | 777.28 | 778.34 | 776.12 |
| 89  | 788.08 | 780.10 | 780.59 | 781.84 | 778.52 |
| 90  | 791.62 | 786.10 | 786.22 | 783.15 | 785.55 |
| 91  | 793.02 | 787.91 | 788.77 | 787.32 | 789.62 |
| 92  | 801.70 | 790.04 | 790.20 | 791.65 | 790.98 |
| 93  | 812.61 | 792.28 | 792.38 | 797.74 | 793.11 |
| 94  | 822.09 | 818.00 | 817.34 | 814.04 | 816.87 |
| 95  | 829.89 | 823.79 | 822.48 | 824.78 | 821.25 |
| 96  | 832.15 | 829.08 | 829.10 | 829.44 | 821.73 |
| 97  | 847.92 | 836.75 | 852.79 | 842.22 | 842.54 |
| 98  | 849.36 | 859.63 | 867.89 | 857.11 | 846.19 |
| 99  | 874.87 | 864.58 | 874.61 | 875.25 | 864.00 |
| 100 | 877.35 | 874.57 | 875.33 | 877.44 | 872.86 |
| 101 | 881.12 | 875.53 | 876.85 | 878.16 | 875.25 |

|     |         |         |         |         |         |
|-----|---------|---------|---------|---------|---------|
| 102 | 887.32  | 878.89  | 881.41  | 881.70  | 877.88  |
| 103 | 913.71  | 881.98  | 882.50  | 887.57  | 879.74  |
| 104 | 917.47  | 887.64  | 887.69  | 889.84  | 887.21  |
| 105 | 920.99  | 907.89  | 905.21  | 908.56  | 901.83  |
| 106 | 932.05  | 914.31  | 914.13  | 909.18  | 913.86  |
| 107 | 934.48  | 918.43  | 918.93  | 919.96  | 919.69  |
| 108 | 938.62  | 926.13  | 927.65  | 922.02  | 925.17  |
| 109 | 941.62  | 935.93  | 937.59  | 936.50  | 935.90  |
| 110 | 944.05  | 939.10  | 938.54  | 937.09  | 937.97  |
| 111 | 945.92  | 944.83  | 944.62  | 945.61  | 945.26  |
| 112 | 948.99  | 948.29  | 948.67  | 946.17  | 945.87  |
| 113 | 954.15  | 953.21  | 953.93  | 952.74  | 952.46  |
| 114 | 958.03  | 954.87  | 954.80  | 955.96  | 953.65  |
| 115 | 965.20  | 958.01  | 959.52  | 956.45  | 954.75  |
| 116 | 967.52  | 959.00  | 963.46  | 959.10  | 956.56  |
| 117 | 973.70  | 964.88  | 964.89  | 961.72  | 961.55  |
| 118 | 978.45  | 972.03  | 976.97  | 968.85  | 968.06  |
| 119 | 978.77  | 978.22  | 977.14  | 979.12  | 977.06  |
| 120 | 980.15  | 980.48  | 980.62  | 979.58  | 981.63  |
| 121 | 981.51  | 981.44  | 981.63  | 979.91  | 981.71  |
| 122 | 986.05  | 982.78  | 984.09  | 983.69  | 982.03  |
| 123 | 986.56  | 985.88  | 985.45  | 987.78  | 986.79  |
| 124 | 990.77  | 988.10  | 987.44  | 991.55  | 988.92  |
| 125 | 996.84  | 999.52  | 998.92  | 997.81  | 999.07  |
| 126 | 1039.08 | 1034.63 | 1030.23 | 1029.79 | 1026.37 |
| 127 | 1053.03 | 1053.81 | 1053.86 | 1039.92 | 1049.03 |
| 128 | 1061.69 | 1057.96 | 1056.15 | 1049.32 | 1050.09 |
| 129 | 1064.26 | 1064.45 | 1063.36 | 1061.10 | 1053.57 |
| 130 | 1066.51 | 1065.47 | 1063.97 | 1062.39 | 1061.09 |
| 131 | 1068.81 | 1068.35 | 1068.13 | 1069.18 | 1069.37 |
| 132 | 1074.24 | 1073.52 | 1073.16 | 1071.14 | 1071.71 |
| 133 | 1074.63 | 1074.24 | 1074.12 | 1071.62 | 1072.03 |
| 134 | 1080.53 | 1080.49 | 1080.39 | 1081.47 | 1080.45 |
| 135 | 1107.61 | 1100.49 | 1099.42 | 1093.53 | 1091.93 |
| 136 | 1123.61 | 1122.16 | 1122.54 | 1121.39 | 1118.01 |
| 137 | 1129.50 | 1127.66 | 1126.09 | 1122.83 | 1121.65 |
| 138 | 1134.57 | 1128.40 | 1127.51 | 1129.99 | 1125.40 |
| 139 | 1141.64 | 1140.63 | 1140.70 | 1140.16 | 1139.12 |
| 140 | 1149.09 | 1142.41 | 1142.18 | 1140.98 | 1141.22 |
| 141 | 1153.87 | 1153.04 | 1149.29 | 1150.83 | 1145.16 |
| 142 | 1186.05 | 1170.99 | 1170.04 | 1175.28 | 1163.90 |
| 143 | 1189.19 | 1175.89 | 1179.40 | 1177.35 | 1172.25 |
| 144 | 1191.16 | 1187.11 | 1189.30 | 1189.05 | 1185.36 |
| 145 | 1191.38 | 1189.49 | 1191.02 | 1189.99 | 1185.94 |
| 146 | 1191.81 | 1191.26 | 1191.67 | 1190.32 | 1190.82 |
| 147 | 1194.01 | 1191.90 | 1192.12 | 1193.14 | 1191.22 |
| 148 | 1194.50 | 1192.28 | 1192.39 | 1195.32 | 1191.33 |
| 149 | 1197.75 | 1192.37 | 1194.43 | 1195.44 | 1193.57 |
| 150 | 1200.00 | 1196.60 | 1195.80 | 1195.91 | 1194.51 |
| 151 | 1201.02 | 1197.17 | 1199.00 | 1199.68 | 1199.59 |
| 152 | 1207.64 | 1201.02 | 1200.78 | 1201.70 | 1202.09 |

|     |         |         |         |         |         |
|-----|---------|---------|---------|---------|---------|
| 153 | 1219.58 | 1205.24 | 1201.27 | 1206.16 | 1206.56 |
| 154 | 1222.00 | 1208.60 | 1208.17 | 1210.10 | 1208.77 |
| 155 | 1228.41 | 1212.33 | 1214.69 | 1211.72 | 1217.20 |
| 156 | 1232.41 | 1229.95 | 1226.69 | 1229.58 | 1221.34 |
| 157 | 1239.28 | 1233.07 | 1229.79 | 1231.34 | 1234.81 |
| 158 | 1244.31 | 1233.47 | 1234.93 | 1232.80 | 1236.53 |
| 159 | 1252.94 | 1237.64 | 1237.74 | 1235.58 | 1239.24 |
| 160 | 1253.13 | 1240.64 | 1241.42 | 1239.60 | 1244.86 |
| 161 | 1256.54 | 1244.24 | 1248.78 | 1257.69 | 1250.11 |
| 162 | 1272.26 | 1255.39 | 1254.10 | 1262.74 | 1257.50 |
| 163 | 1273.74 | 1260.67 | 1259.77 | 1270.76 | 1264.74 |
| 164 | 1289.72 | 1271.29 | 1269.20 | 1272.37 | 1266.54 |
| 165 | 1291.49 | 1273.60 | 1271.05 | 1275.90 | 1277.78 |
| 166 | 1295.96 | 1280.35 | 1281.37 | 1288.57 | 1279.61 |
| 167 | 1307.10 | 1280.88 | 1284.60 | 1290.78 | 1292.57 |
| 168 | 1307.29 | 1295.00 | 1293.44 | 1296.24 | 1294.20 |
| 169 | 1318.47 | 1305.80 | 1301.54 | 1308.33 | 1309.79 |
| 170 | 1324.49 | 1307.19 | 1305.85 | 1315.40 | 1315.47 |
| 171 | 1325.58 | 1318.16 | 1318.65 | 1319.62 | 1316.98 |
| 172 | 1327.83 | 1319.32 | 1319.71 | 1321.37 | 1318.49 |
| 173 | 1332.52 | 1322.72 | 1322.23 | 1324.44 | 1323.24 |
| 174 | 1334.99 | 1326.88 | 1326.23 | 1329.99 | 1331.35 |
| 175 | 1344.67 | 1339.66 | 1336.87 | 1342.77 | 1339.91 |
| 176 | 1349.95 | 1342.49 | 1339.56 | 1345.32 | 1345.56 |
| 177 | 1355.18 | 1346.48 | 1345.99 | 1348.70 | 1351.19 |
| 178 | 1362.30 | 1359.84 | 1358.89 | 1361.86 | 1359.02 |
| 179 | 1364.77 | 1362.95 | 1360.74 | 1362.02 | 1361.91 |
| 180 | 1365.01 | 1364.45 | 1362.73 | 1364.18 | 1362.82 |
| 181 | 1371.75 | 1368.98 | 1367.14 | 1374.84 | 1367.36 |
| 182 | 1374.64 | 1370.63 | 1368.74 | 1376.98 | 1376.75 |
| 183 | 1381.47 | 1376.34 | 1375.61 | 1382.73 | 1377.76 |
| 184 | 1388.14 | 1379.16 | 1379.61 | 1387.52 | 1380.39 |
| 185 | 1396.74 | 1382.49 | 1382.16 | 1395.57 | 1383.69 |
| 186 | 1403.83 | 1394.03 | 1395.45 | 1399.77 | 1391.15 |
| 187 | 1405.73 | 1396.36 | 1397.92 | 1402.90 | 1402.28 |
| 188 | 1406.36 | 1406.96 | 1406.56 | 1405.43 | 1404.78 |
| 189 | 1445.01 | 1425.50 | 1422.03 | 1441.17 | 1418.47 |
| 190 | 1459.41 | 1429.11 | 1438.64 | 1455.49 | 1448.64 |
| 191 | 1482.88 | 1439.53 | 1448.07 | 1460.94 | 1459.53 |
| 192 | 1495.29 | 1482.31 | 1478.02 | 1484.70 | 1470.61 |
| 193 | 1497.30 | 1486.55 | 1481.73 | 1487.65 | 1477.89 |
| 194 | 1499.36 | 1493.87 | 1493.97 | 1495.43 | 1492.14 |
| 195 | 1500.13 | 1494.63 | 1495.87 | 1497.88 | 1496.14 |
| 196 | 1504.68 | 1495.62 | 1497.08 | 1498.33 | 1497.41 |
| 197 | 1507.72 | 1499.80 | 1499.93 | 1500.92 | 1498.63 |
| 198 | 1508.88 | 1503.03 | 1502.98 | 1501.74 | 1500.88 |
| 199 | 1512.86 | 1507.28 | 1506.95 | 1507.01 | 1502.23 |
| 200 | 1514.73 | 1508.61 | 1507.33 | 1507.88 | 1503.12 |
| 201 | 1515.65 | 1514.67 | 1515.23 | 1511.86 | 1511.38 |
| 202 | 1518.20 | 1515.50 | 1516.05 | 1513.46 | 1513.98 |
| 203 | 1520.72 | 1519.78 | 1519.53 | 1517.15 | 1514.46 |

|     |         |         |         |         |         |
|-----|---------|---------|---------|---------|---------|
| 204 | 1535.63 | 1530.41 | 1522.76 | 1519.92 | 1517.10 |
| 205 | 1539.83 | 1533.59 | 1534.78 | 1532.21 | 1524.26 |
| 206 | 1541.80 | 1537.54 | 1539.46 | 1539.93 | 1534.86 |
| 207 | 1544.08 | 1539.58 | 1539.57 | 1540.92 | 1538.11 |
| 208 | 1545.53 | 1541.54 | 1541.10 | 1541.82 | 1538.91 |
| 209 | 1596.79 | 1553.31 | 1553.89 | 1550.76 | 1542.56 |
| 210 | 1622.69 | 1574.14 | 1570.61 | 1565.91 | 1562.69 |
| 211 | 1624.92 | 1575.46 | 1583.35 | 1596.28 | 1569.99 |
| 212 | 1631.10 | 1600.95 | 1592.47 | 1601.78 | 1591.59 |
| 213 | 1640.03 | 1604.87 | 1599.04 | 1616.89 | 1615.54 |
| 214 | 1640.45 | 1619.84 | 1620.75 | 1622.80 | 1623.40 |
| 215 | 1641.86 | 1630.11 | 1629.62 | 1639.64 | 1637.19 |
| 216 | 1645.84 | 1634.35 | 1638.24 | 1640.80 | 1639.52 |
| 217 | 1648.78 | 1635.47 | 1638.27 | 1642.47 | 1641.03 |
| 218 | 1648.82 | 1640.77 | 1640.72 | 1650.39 | 1649.59 |
| 219 | 1659.73 | 1651.66 | 1655.23 | 1657.49 | 1656.04 |
| 220 | 1661.31 | 1652.85 | 1655.92 | 1659.13 | 1656.24 |
| 221 | 1662.32 | 1658.85 | 1658.71 | 1660.51 | 1659.55 |
| 222 | 1669.83 | 1665.58 | 1665.41 | 1787.92 | 1662.49 |
| 223 | 3027.03 | 3018.96 | 3022.99 | 3017.63 | 3015.90 |
| 224 | 3027.09 | 3019.59 | 3023.40 | 3018.06 | 3016.77 |
| 225 | 3027.50 | 3028.97 | 3028.07 | 3033.95 | 3029.89 |
| 226 | 3052.86 | 3046.26 | 3049.45 | 3043.22 | 3045.41 |
| 227 | 3053.45 | 3046.43 | 3049.64 | 3044.70 | 3046.88 |
| 228 | 3054.48 | 3053.97 | 3053.57 | 3057.19 | 3054.66 |
| 229 | 3069.93 | 3060.31 | 3065.63 | 3058.40 | 3059.12 |
| 230 | 3071.72 | 3061.33 | 3066.67 | 3058.71 | 3060.21 |
| 231 | 3071.89 | 3071.88 | 3071.24 | 3074.34 | 3069.23 |
| 232 | 3100.46 | 3100.13 | 3100.03 | 3095.91 | 3101.10 |
| 233 | 3102.21 | 3100.36 | 3101.62 | 3097.40 | 3102.39 |
| 234 | 3102.90 | 3100.55 | 3102.02 | 3108.41 | 3103.85 |
| 235 | 3169.71 | 3170.19 | 3171.39 | 3168.33 | 3174.81 |
| 236 | 3169.81 | 3171.05 | 3172.38 | 3169.05 | 3175.86 |
| 237 | 3173.70 | 3175.71 | 3174.69 | 3179.06 | 3176.19 |
| 238 | 3180.82 | 3182.08 | 3181.10 | 3180.08 | 3182.88 |
| 239 | 3181.40 | 3185.11 | 3185.40 | 3181.16 | 3183.32 |
| 240 | 3181.72 | 3185.18 | 3185.53 | 3185.97 | 3183.77 |
| 241 | 3193.26 | 3187.95 | 3188.96 | 3188.24 | 3191.24 |
| 242 | 3193.74 | 3189.25 | 3190.24 | 3188.63 | 3193.26 |
| 243 | 3193.86 | 3195.07 | 3194.18 | 3190.32 | 3194.62 |
| 244 | 3193.98 | 3195.18 | 3194.35 | 3190.94 | 3194.69 |
| 245 | 3194.48 | 3196.54 | 3197.21 | 3200.94 | 3194.92 |
| 246 | 3197.28 | 3197.71 | 3198.26 | 3203.29 | 3196.93 |
| 247 | 3205.17 | 3205.43 | 3204.83 | 3204.13 | 3207.85 |
| 248 | 3205.56 | 3205.85 | 3205.27 | 3204.18 | 3208.32 |
| 249 | 3206.58 | 3209.37 | 3209.84 | 3204.74 | 3208.55 |
| 250 | 3206.90 | 3210.14 | 3210.56 | 3211.13 | 3208.64 |
| 251 | 3213.60 | 3215.05 | 3215.52 | 3213.99 | 3211.18 |
| 252 | 3216.24 | 3216.77 | 3216.19 | 3214.40 | 3218.78 |
| 253 | 3217.46 | 3217.55 | 3216.86 | 3215.61 | 3219.46 |
| 254 | 3217.66 | 3219.73 | 3220.83 | 3216.19 | 3220.12 |

|     |         |         |         |         |         |
|-----|---------|---------|---------|---------|---------|
| 255 | 3218.00 | 3220.51 | 3221.54 | 3221.59 | 3220.71 |
| 256 | 3226.18 | 3232.41 | 3233.12 | 3227.46 | 3224.51 |
| 257 | 3264.22 | 3265.03 | 3259.88 | 3258.42 | 3250.03 |
| 258 | 3265.35 | 3267.21 | 3262.24 | 3261.19 | 3265.32 |

**Table S28** Vibration frequencies of TAzBN in the solid phase at B3LYP/6-31G(d) by (TDA)-DFT.

| No. | S <sub>0</sub> | S <sub>1</sub> | T <sub>1</sub> | T <sub>2</sub> | T <sub>3</sub> |
|-----|----------------|----------------|----------------|----------------|----------------|
| 1   | 72.96          | 71.38          | 72.43          | 72.95          | 72.62          |
| 2   | 73.94          | 77.03          | 76.29          | 76.07          | 75.46          |
| 3   | 81.87          | 81.66          | 81.55          | 81.61          | 82.18          |
| 4   | 87.29          | 89.05          | 89.18          | 87.02          | 87.27          |
| 5   | 91.17          | 91.30          | 91.16          | 90.45          | 90.56          |
| 6   | 103.93         | 104.71         | 104.51         | 104.33         | 104.18         |
| 7   | 106.46         | 105.79         | 105.73         | 106.39         | 106.35         |
| 8   | 108.32         | 110.10         | 110.19         | 110.59         | 110.12         |
| 9   | 117.07         | 113.36         | 114.21         | 115.82         | 115.07         |
| 10  | 120.79         | 118.85         | 118.87         | 120.07         | 118.68         |
| 11  | 122.62         | 121.66         | 121.37         | 123.28         | 122.23         |
| 12  | 124.99         | 124.23         | 123.67         | 125.66         | 125.05         |
| 13  | 136.37         | 133.21         | 133.97         | 135.29         | 135.21         |
| 14  | 151.86         | 147.63         | 148.09         | 150.07         | 148.51         |
| 15  | 159.20         | 157.83         | 157.79         | 160.35         | 157.59         |
| 16  | 165.80         | 165.48         | 164.91         | 161.72         | 162.56         |
| 17  | 172.38         | 171.52         | 171.31         | 172.48         | 172.63         |
| 18  | 180.18         | 178.44         | 178.63         | 179.34         | 178.52         |
| 19  | 183.37         | 185.65         | 184.48         | 183.93         | 183.45         |
| 20  | 201.48         | 203.22         | 201.69         | 202.86         | 200.14         |
| 21  | 208.91         | 208.76         | 208.31         | 204.36         | 205.84         |
| 22  | 222.32         | 219.66         | 220.63         | 215.28         | 220.24         |
| 23  | 227.28         | 227.11         | 226.98         | 226.69         | 228.44         |
| 24  | 240.77         | 233.35         | 233.60         | 233.96         | 234.07         |
| 25  | 245.39         | 242.45         | 243.54         | 241.60         | 243.91         |
| 26  | 254.42         | 248.27         | 249.52         | 250.36         | 248.31         |
| 27  | 281.01         | 266.50         | 267.09         | 270.74         | 261.60         |
| 28  | 288.70         | 287.10         | 287.01         | 286.22         | 285.49         |
| 29  | 303.73         | 299.29         | 297.01         | 299.31         | 295.64         |
| 30  | 310.32         | 303.15         | 303.88         | 305.92         | 299.89         |
| 31  | 314.08         | 309.51         | 308.13         | 314.33         | 307.20         |
| 32  | 333.29         | 331.58         | 332.61         | 331.88         | 330.95         |
| 33  | 342.57         | 343.56         | 343.79         | 341.98         | 342.16         |
| 34  | 347.98         | 345.96         | 345.79         | 346.55         | 347.87         |
| 35  | 355.99         | 353.83         | 354.71         | 355.93         | 354.87         |
| 36  | 365.28         | 362.59         | 362.08         | 364.81         | 363.88         |
| 37  | 370.57         | 366.61         | 366.54         | 369.38         | 367.27         |
| 38  | 383.02         | 380.53         | 380.62         | 372.03         | 380.83         |
| 39  | 394.28         | 390.41         | 390.18         | 392.79         | 390.73         |
| 40  | 403.42         | 398.86         | 394.81         | 399.22         | 395.48         |
| 41  | 412.61         | 404.33         | 404.90         | 404.02         | 404.56         |

|    |        |        |        |        |        |
|----|--------|--------|--------|--------|--------|
| 42 | 439.19 | 427.96 | 426.44 | 422.09 | 430.92 |
| 43 | 447.64 | 446.35 | 446.12 | 443.94 | 444.83 |
| 44 | 455.43 | 451.84 | 452.11 | 448.59 | 446.27 |
| 45 | 459.04 | 454.77 | 453.71 | 455.03 | 453.26 |
| 46 | 469.23 | 467.46 | 467.63 | 466.43 | 467.77 |
| 47 | 474.00 | 471.00 | 471.55 | 470.74 | 469.82 |
| 48 | 481.85 | 479.39 | 480.10 | 477.92 | 478.33 |
| 49 | 488.13 | 481.46 | 482.26 | 483.73 | 483.01 |
| 50 | 492.83 | 484.23 | 484.86 | 486.62 | 486.84 |
| 51 | 497.80 | 493.61 | 493.09 | 494.76 | 493.66 |
| 52 | 505.26 | 501.02 | 500.67 | 501.45 | 502.33 |
| 53 | 526.14 | 520.05 | 523.57 | 519.39 | 520.80 |
| 54 | 531.12 | 529.63 | 527.87 | 527.65 | 526.04 |
| 55 | 544.75 | 539.01 | 537.65 | 539.26 | 534.85 |
| 56 | 554.54 | 540.63 | 540.27 | 542.34 | 535.39 |
| 57 | 557.70 | 546.69 | 545.85 | 548.77 | 542.84 |
| 58 | 560.37 | 556.79 | 557.31 | 556.57 | 550.30 |
| 59 | 568.46 | 559.86 | 558.79 | 561.12 | 556.92 |
| 60 | 573.06 | 562.27 | 563.24 | 561.63 | 566.59 |
| 61 | 585.20 | 572.28 | 570.85 | 570.67 | 574.39 |
| 62 | 586.55 | 582.19 | 579.12 | 576.29 | 578.98 |
| 63 | 594.54 | 585.89 | 584.46 | 583.30 | 585.75 |
| 64 | 608.80 | 589.47 | 589.41 | 590.90 | 590.53 |
| 65 | 613.46 | 598.05 | 600.85 | 591.89 | 607.03 |
| 66 | 618.25 | 611.49 | 611.24 | 608.84 | 610.71 |
| 67 | 624.73 | 616.16 | 613.97 | 611.28 | 611.98 |
| 68 | 634.00 | 618.13 | 618.13 | 616.47 | 619.96 |
| 69 | 637.84 | 620.90 | 619.48 | 620.54 | 623.17 |
| 70 | 646.94 | 631.68 | 629.79 | 635.88 | 633.54 |
| 71 | 659.15 | 643.90 | 641.38 | 647.35 | 648.26 |
| 72 | 660.25 | 655.32 | 654.69 | 649.47 | 653.48 |
| 73 | 665.85 | 661.39 | 658.20 | 653.42 | 660.69 |
| 74 | 691.67 | 680.21 | 673.32 | 686.49 | 679.04 |
| 75 | 697.96 | 695.96 | 694.77 | 689.68 | 695.80 |
| 76 | 704.68 | 699.19 | 697.23 | 717.29 | 698.02 |
| 77 | 732.11 | 724.55 | 730.18 | 728.31 | 727.99 |
| 78 | 734.83 | 731.17 | 731.70 | 731.00 | 733.31 |
| 79 | 756.03 | 734.04 | 734.28 | 732.45 | 737.72 |
| 80 | 760.76 | 748.29 | 749.88 | 745.82 | 746.80 |
| 81 | 761.81 | 757.89 | 760.61 | 758.01 | 755.41 |
| 82 | 772.44 | 761.52 | 762.27 | 760.05 | 760.90 |
| 83 | 777.94 | 765.17 | 768.95 | 763.71 | 764.49 |
| 84 | 782.52 | 770.14 | 771.76 | 769.66 | 768.24 |
| 85 | 783.35 | 776.12 | 779.01 | 778.32 | 775.46 |
| 86 | 787.16 | 781.15 | 781.04 | 780.13 | 780.25 |
| 87 | 792.31 | 784.58 | 784.16 | 781.26 | 785.48 |
| 88 | 793.49 | 785.80 | 785.26 | 788.16 | 788.51 |
| 89 | 795.72 | 791.12 | 793.23 | 793.15 | 791.61 |
| 90 | 804.80 | 793.88 | 794.48 | 796.12 | 794.12 |
| 91 | 807.78 | 796.16 | 797.26 | 800.81 | 794.49 |
| 92 | 811.69 | 806.70 | 807.18 | 806.39 | 805.26 |

|     |         |         |         |         |         |
|-----|---------|---------|---------|---------|---------|
| 93  | 817.97  | 808.25  | 808.08  | 808.48  | 806.41  |
| 94  | 823.87  | 817.42  | 816.97  | 815.18  | 816.16  |
| 95  | 827.34  | 825.13  | 825.22  | 819.60  | 820.18  |
| 96  | 835.06  | 826.72  | 825.49  | 828.87  | 823.07  |
| 97  | 839.68  | 828.30  | 845.34  | 833.44  | 829.53  |
| 98  | 844.83  | 848.16  | 867.65  | 846.35  | 838.97  |
| 99  | 877.75  | 862.49  | 869.31  | 875.61  | 864.57  |
| 100 | 880.30  | 877.00  | 877.15  | 876.16  | 873.20  |
| 101 | 894.39  | 878.12  | 879.75  | 879.48  | 875.44  |
| 102 | 902.04  | 879.75  | 881.19  | 887.74  | 877.38  |
| 103 | 912.69  | 893.35  | 892.78  | 893.25  | 889.08  |
| 104 | 917.52  | 900.84  | 900.59  | 898.09  | 898.55  |
| 105 | 920.66  | 910.96  | 908.95  | 907.95  | 905.71  |
| 106 | 928.34  | 912.18  | 913.83  | 910.92  | 913.31  |
| 107 | 934.39  | 917.70  | 918.76  | 917.63  | 918.08  |
| 108 | 942.02  | 922.22  | 922.18  | 920.77  | 923.90  |
| 109 | 943.15  | 933.00  | 935.04  | 935.12  | 936.55  |
| 110 | 944.36  | 937.92  | 937.34  | 935.40  | 937.13  |
| 111 | 948.88  | 946.62  | 946.64  | 945.40  | 944.56  |
| 112 | 956.28  | 951.62  | 951.69  | 951.61  | 950.91  |
| 113 | 960.34  | 956.83  | 957.49  | 956.87  | 955.07  |
| 114 | 964.38  | 959.42  | 959.21  | 958.41  | 957.42  |
| 115 | 965.14  | 964.36  | 964.06  | 963.76  | 960.14  |
| 116 | 967.07  | 968.44  | 969.18  | 964.90  | 963.13  |
| 117 | 980.61  | 968.78  | 972.68  | 966.68  | 965.68  |
| 118 | 988.62  | 973.27  | 978.44  | 970.40  | 969.63  |
| 119 | 989.46  | 987.70  | 986.86  | 988.54  | 985.20  |
| 120 | 990.21  | 989.75  | 988.81  | 989.50  | 988.60  |
| 121 | 991.89  | 990.45  | 989.72  | 992.45  | 989.84  |
| 122 | 1000.63 | 1000.04 | 1001.69 | 1000.08 | 998.94  |
| 123 | 1008.46 | 1012.22 | 1011.67 | 1008.45 | 1009.27 |
| 124 | 1016.06 | 1015.70 | 1016.46 | 1017.76 | 1015.67 |
| 125 | 1016.70 | 1020.31 | 1018.82 | 1021.58 | 1018.65 |
| 126 | 1042.29 | 1040.01 | 1035.39 | 1031.17 | 1027.72 |
| 127 | 1048.26 | 1048.25 | 1047.58 | 1043.58 | 1043.42 |
| 128 | 1055.39 | 1050.30 | 1048.99 | 1046.52 | 1046.63 |
| 129 | 1062.05 | 1060.23 | 1059.53 | 1056.24 | 1054.69 |
| 130 | 1066.23 | 1062.67 | 1062.32 | 1061.07 | 1060.02 |
| 131 | 1071.12 | 1070.93 | 1070.74 | 1071.10 | 1070.98 |
| 132 | 1079.61 | 1079.39 | 1079.28 | 1079.23 | 1078.79 |
| 133 | 1083.35 | 1083.13 | 1083.02 | 1080.96 | 1081.90 |
| 134 | 1086.05 | 1083.54 | 1083.38 | 1082.16 | 1083.41 |
| 135 | 1105.73 | 1099.09 | 1098.14 | 1091.06 | 1095.12 |
| 136 | 1123.37 | 1120.90 | 1121.66 | 1119.19 | 1114.88 |
| 137 | 1131.50 | 1125.38 | 1124.01 | 1123.01 | 1119.73 |
| 138 | 1132.09 | 1127.01 | 1126.06 | 1129.64 | 1122.25 |
| 139 | 1142.68 | 1142.05 | 1142.31 | 1141.71 | 1141.55 |
| 140 | 1150.82 | 1144.79 | 1144.60 | 1144.37 | 1144.07 |
| 141 | 1158.74 | 1157.65 | 1155.38 | 1155.65 | 1151.24 |
| 142 | 1181.49 | 1162.41 | 1170.51 | 1169.22 | 1160.89 |
| 143 | 1191.82 | 1170.19 | 1175.32 | 1171.24 | 1168.99 |

|     |         |         |         |         |         |
|-----|---------|---------|---------|---------|---------|
| 144 | 1198.20 | 1183.65 | 1192.32 | 1189.71 | 1191.23 |
| 145 | 1200.20 | 1192.54 | 1193.94 | 1193.72 | 1193.24 |
| 146 | 1203.29 | 1194.13 | 1196.58 | 1196.68 | 1195.16 |
| 147 | 1204.72 | 1198.40 | 1197.99 | 1198.44 | 1199.13 |
| 148 | 1206.74 | 1201.09 | 1198.65 | 1200.00 | 1200.43 |
| 149 | 1208.49 | 1202.74 | 1201.68 | 1201.01 | 1204.93 |
| 150 | 1210.06 | 1205.56 | 1204.27 | 1204.35 | 1205.71 |
| 151 | 1210.69 | 1207.62 | 1206.49 | 1206.62 | 1208.71 |
| 152 | 1215.05 | 1209.17 | 1208.44 | 1209.67 | 1210.17 |
| 153 | 1222.05 | 1210.97 | 1211.11 | 1209.94 | 1214.64 |
| 154 | 1227.37 | 1214.25 | 1214.20 | 1214.55 | 1217.42 |
| 155 | 1229.37 | 1218.15 | 1219.79 | 1219.85 | 1221.35 |
| 156 | 1234.92 | 1230.65 | 1228.22 | 1230.77 | 1224.59 |
| 157 | 1242.33 | 1232.66 | 1233.61 | 1232.02 | 1234.61 |
| 158 | 1252.31 | 1234.96 | 1236.75 | 1235.42 | 1237.89 |
| 159 | 1257.10 | 1236.68 | 1240.04 | 1237.96 | 1242.84 |
| 160 | 1260.27 | 1243.08 | 1246.76 | 1246.11 | 1245.36 |
| 161 | 1263.91 | 1248.08 | 1247.31 | 1250.52 | 1254.27 |
| 162 | 1274.00 | 1253.66 | 1250.98 | 1257.18 | 1256.83 |
| 163 | 1276.56 | 1257.97 | 1257.67 | 1261.94 | 1267.03 |
| 164 | 1286.54 | 1272.97 | 1270.93 | 1272.94 | 1273.15 |
| 165 | 1288.48 | 1275.36 | 1275.85 | 1277.40 | 1275.06 |
| 166 | 1292.01 | 1277.77 | 1277.59 | 1283.53 | 1279.10 |
| 167 | 1306.15 | 1280.13 | 1282.42 | 1285.08 | 1284.80 |
| 168 | 1308.61 | 1289.87 | 1288.92 | 1293.19 | 1290.61 |
| 169 | 1315.26 | 1302.12 | 1297.96 | 1300.49 | 1307.64 |
| 170 | 1317.99 | 1306.86 | 1302.74 | 1315.17 | 1317.79 |
| 171 | 1327.22 | 1315.40 | 1316.42 | 1319.52 | 1319.72 |
| 172 | 1328.99 | 1317.82 | 1318.36 | 1321.43 | 1321.92 |
| 173 | 1332.66 | 1328.05 | 1327.64 | 1326.98 | 1326.80 |
| 174 | 1337.51 | 1332.53 | 1331.86 | 1332.62 | 1334.16 |
| 175 | 1338.16 | 1337.95 | 1336.79 | 1340.20 | 1338.64 |
| 176 | 1342.99 | 1340.44 | 1340.18 | 1342.30 | 1341.13 |
| 177 | 1349.63 | 1342.88 | 1340.80 | 1347.48 | 1351.82 |
| 178 | 1359.08 | 1356.69 | 1353.91 | 1359.64 | 1357.17 |
| 179 | 1368.31 | 1358.98 | 1357.82 | 1366.25 | 1359.64 |
| 180 | 1373.21 | 1364.40 | 1359.45 | 1371.01 | 1365.00 |
| 181 | 1378.36 | 1368.48 | 1368.62 | 1377.30 | 1369.27 |
| 182 | 1384.16 | 1373.88 | 1373.78 | 1381.97 | 1380.48 |
| 183 | 1386.48 | 1380.80 | 1382.17 | 1387.45 | 1385.91 |
| 184 | 1388.10 | 1386.49 | 1386.02 | 1387.97 | 1386.95 |
| 185 | 1400.04 | 1387.25 | 1386.67 | 1390.56 | 1391.21 |
| 186 | 1402.72 | 1396.91 | 1396.88 | 1399.76 | 1398.23 |
| 187 | 1405.33 | 1403.80 | 1403.14 | 1405.40 | 1405.09 |
| 188 | 1405.72 | 1406.13 | 1405.80 | 1405.62 | 1410.52 |
| 189 | 1445.74 | 1416.00 | 1418.78 | 1438.14 | 1417.78 |
| 190 | 1461.56 | 1424.87 | 1436.98 | 1453.55 | 1432.75 |
| 191 | 1478.36 | 1440.45 | 1437.87 | 1458.89 | 1447.26 |
| 192 | 1494.04 | 1481.78 | 1472.00 | 1483.76 | 1463.36 |
| 193 | 1502.13 | 1487.78 | 1482.95 | 1490.15 | 1469.25 |
| 194 | 1505.30 | 1493.00 | 1493.15 | 1497.45 | 1490.92 |



|     |         |         |         |         |         |
|-----|---------|---------|---------|---------|---------|
| 195 | 1506.11 | 1501.39 | 1501.35 | 1498.74 | 1500.73 |
| 196 | 1508.56 | 1502.73 | 1503.63 | 1503.65 | 1504.25 |
| 197 | 1510.26 | 1503.83 | 1505.65 | 1505.82 | 1505.64 |
| 198 | 1515.03 | 1506.28 | 1506.24 | 1508.10 | 1505.92 |
| 199 | 1518.54 | 1517.64 | 1516.93 | 1509.11 | 1509.16 |
| 200 | 1521.30 | 1520.33 | 1518.14 | 1516.62 | 1511.63 |
| 201 | 1523.16 | 1522.24 | 1520.62 | 1520.09 | 1516.15 |
| 202 | 1523.57 | 1523.18 | 1522.33 | 1521.09 | 1519.77 |
| 203 | 1526.39 | 1526.15 | 1522.91 | 1523.63 | 1523.25 |
| 204 | 1530.93 | 1528.77 | 1526.91 | 1525.83 | 1525.11 |
| 205 | 1536.07 | 1536.04 | 1535.79 | 1532.45 | 1529.10 |
| 206 | 1540.08 | 1538.18 | 1536.37 | 1537.31 | 1531.69 |
| 207 | 1550.90 | 1540.37 | 1540.11 | 1539.89 | 1537.38 |
| 208 | 1552.40 | 1544.56 | 1546.68 | 1548.00 | 1546.07 |
| 209 | 1590.14 | 1548.43 | 1550.43 | 1549.46 | 1547.11 |
| 210 | 1623.91 | 1567.18 | 1569.82 | 1566.00 | 1557.25 |
| 211 | 1626.70 | 1575.27 | 1579.34 | 1588.24 | 1569.82 |
| 212 | 1629.40 | 1599.28 | 1588.98 | 1600.84 | 1585.26 |
| 213 | 1637.25 | 1606.36 | 1598.52 | 1612.36 | 1618.94 |
| 214 | 1639.09 | 1618.58 | 1615.93 | 1624.93 | 1625.79 |
| 215 | 1640.81 | 1628.53 | 1627.81 | 1639.50 | 1638.55 |
| 216 | 1644.67 | 1639.00 | 1638.79 | 1646.76 | 1645.71 |
| 217 | 1653.24 | 1643.18 | 1646.69 | 1648.63 | 1647.21 |
| 218 | 1656.06 | 1645.05 | 1646.96 | 1653.02 | 1649.15 |
| 219 | 1656.49 | 1655.71 | 1655.53 | 1658.64 | 1656.49 |
| 220 | 1663.62 | 1659.54 | 1660.91 | 1664.17 | 1662.16 |
| 221 | 1667.25 | 1661.13 | 1662.32 | 1668.69 | 1666.78 |
| 222 | 1671.89 | 1663.36 | 1665.76 | 1703.09 | 1675.52 |
| 223 | 3035.54 | 3027.52 | 3031.80 | 3024.97 | 3027.65 |
| 224 | 3040.69 | 3034.76 | 3040.85 | 3032.23 | 3034.31 |
| 225 | 3042.79 | 3043.54 | 3042.15 | 3047.57 | 3045.62 |
| 226 | 3062.69 | 3060.74 | 3062.07 | 3059.58 | 3062.94 |
| 227 | 3068.93 | 3063.13 | 3063.52 | 3066.70 | 3065.70 |
| 228 | 3071.83 | 3074.84 | 3073.50 | 3076.74 | 3079.84 |
| 229 | 3096.67 | 3078.44 | 3085.20 | 3081.52 | 3079.99 |
| 230 | 3097.49 | 3084.10 | 3089.62 | 3082.37 | 3086.44 |
| 231 | 3108.81 | 3106.96 | 3106.23 | 3109.62 | 3109.20 |
| 232 | 3122.32 | 3111.84 | 3114.28 | 3109.70 | 3111.00 |
| 233 | 3157.55 | 3152.62 | 3154.65 | 3146.41 | 3155.02 |
| 234 | 3166.74 | 3158.78 | 3161.14 | 3152.86 | 3160.32 |
| 235 | 3167.30 | 3175.03 | 3176.43 | 3172.43 | 3179.81 |
| 236 | 3167.72 | 3176.08 | 3177.63 | 3173.53 | 3180.93 |
| 237 | 3176.83 | 3179.57 | 3177.64 | 3184.59 | 3183.22 |
| 238 | 3188.34 | 3190.80 | 3189.87 | 3195.44 | 3193.21 |
| 239 | 3192.58 | 3193.77 | 3192.85 | 3198.45 | 3196.47 |
| 240 | 3192.76 | 3194.09 | 3193.03 | 3199.00 | 3197.61 |
| 241 | 3202.82 | 3202.50 | 3201.90 | 3202.79 | 3205.15 |
| 242 | 3206.84 | 3204.98 | 3204.93 | 3206.32 | 3206.12 |
| 243 | 3207.99 | 3206.57 | 3207.73 | 3207.96 | 3207.16 |
| 244 | 3208.65 | 3208.39 | 3208.08 | 3212.54 | 3211.35 |
| 245 | 3215.74 | 3216.17 | 3215.39 | 3220.32 | 3219.80 |

|     |         |         |         |         |         |
|-----|---------|---------|---------|---------|---------|
| 246 | 3232.50 | 3222.84 | 3222.61 | 3227.33 | 3226.00 |
| 247 | 3233.51 | 3233.48 | 3233.75 | 3231.49 | 3232.56 |
| 248 | 3235.54 | 3234.77 | 3234.44 | 3232.94 | 3234.38 |
| 249 | 3238.43 | 3240.35 | 3239.09 | 3243.09 | 3240.72 |
| 250 | 3243.32 | 3246.84 | 3240.03 | 3244.42 | 3242.05 |
| 251 | 3248.86 | 3247.54 | 3246.26 | 3247.38 | 3245.09 |
| 252 | 3248.94 | 3249.99 | 3252.07 | 3250.32 | 3249.83 |
| 253 | 3254.10 | 3254.96 | 3255.57 | 3253.89 | 3253.83 |
| 254 | 3258.81 | 3261.38 | 3255.75 | 3257.58 | 3255.08 |
| 255 | 3262.49 | 3261.44 | 3261.67 | 3259.88 | 3260.40 |
| 256 | 3265.88 | 3271.87 | 3270.38 | 3268.80 | 3265.43 |
| 257 | 3266.31 | 3274.23 | 3273.25 | 3269.56 | 3271.76 |
| 258 | 3280.11 | 3287.01 | 3286.07 | 3280.20 | 3284.00 |

---

## 14. References

1. M. Frisch, G. Trucks, H. Schlegel, G. Scuseria, M. Robb, J. Cheeseman, G. Scalmani, V. Barone, G. Petersson and H. Nakatsuji, *Inc.*, Wallingford CT, 2016, **3**.
2. H. Sun, C. Zhong and J.-L. Bredas, *J. Chem. Theory Comput.*, 2015, **11**, 3851-3858.
3. J. Tomasi, B. Mennucci and R. Cammi, *Chem. Rev.*, 2005, **105**, 2999-3094.
4. L. W. Chung, W. Sameera, R. Ramozzi, A. J. Page, M. Hatanaka, G. P. Petrova, T. V. Harris, X. Li, Z. Ke and F. Liu, *Chem. Rev.*, 2015, **115**, 5678-5796.
5. A. K. Rappé, C. J. Casewit, K. Colwell, W. A. Goddard III and W. M. Skiff, *J. Am. Chem. Soc.*, 1992, **114**, 10024-10035.
6. S. Huang, Q. Zhang, Y. Shiota, T. Nakagawa, K. Kuwabara, K. Yoshizawa and C. Adachi, *J. Chem. Theory Comput.*, 2013, **9**, 3872-3877.
7. Y. Jiang, Z. Hu, B. Zhou, C. Zhong, Z. Sun and H. Sun, *J. Phys. Chem. C*, 2019, **123**, 5616-5625.
8. F. Neese, *WIREs Comput Mol Sci.*, 2018, **8**, e1327.
9. K. C. Pan, S. W. Li, Y. Y. Ho, Y. J. Shiu, W. L. Tsai, M. Jiao, W. K. Lee, C. C. Wu, C. L. Chung and T. Chatterjee, *Adv. Funct. Mater.*, 2016, **26**, 7560-7571.
10. T.-L. Wu, M.-J. Huang, C.-C. Lin, P.-Y. Huang, T.-Y. Chou, R.-W. Chen-Cheng, H.-W. Lin, R.-S. Liu and C.-H. Cheng, *Nat. Photonics*, 2018, **12**, 235-240.
11. H. Kubo, T. Hirose, T. Nakashima, T. Kawai, J.-y. Hasegawa and K. Matsuda, *J. Phys. Chem. Lett.*, 2021, **12**, 686-695.
12. M. Yang, I. S. Park and T. Yasuda, *J. Am. Chem. Soc.*, 2020, **142**, 19468-19472.
13. Y. Qi, W. Ning, Y. Zou, X. Cao, S. Gong and C. Yang, *Adv. Funct. Mater.*, 2021, **31**, 2102017.
14. X. F. Luo, H. X. Ni, A. Q. Lv, X. K. Yao, H. L. Ma and Y. X. Zheng, *Adv. Opt. Mater.*, 2022, **10**, 2200504.
15. Y. Zou, J. Hu, M. Yu, J. Miao, Z. Xie, Y. Qiu, X. Cao and C. Yang, *Adv. Mater.*, 2022, **34**, 2201442.
16. Y. Zou, J. He, N. Li, Y. Hu, S. Luo, X. Cao and C. Yang, *Mater. Horiz.*, 2023, **10**, 3712-3718.
17. J. He, Y. Xu, S. Luo, J. Miao, X. Cao and Y. Zou, *Chem. Eng. J.*, 2023, **471**, 144565.
18. Y. Liu, X. Xiao, Y. Ran, Z. Bin and J. You, *Chem. Sci.*, 2021, **12**, 9408-9412.
19. Y. C. Cheng, X. C. Fan, F. Huang, X. Xiong, J. Yu, K. Wang, C. S. Lee and X. H. Zhang, *Angew. Chem. Int. Ed.*, 2022, **134**, e202212575.
20. X. Cai, Y. Xu, Y. Pan, L. Li, Y. Pu, X. Zhuang, C. Li and Y. Wang, *Angew. Chem. Int. Ed.*, 2023, **62**, e202216473.
21. W. Yang, J. Miao, F. Hu, Y. Zou, C. Zhong, S. Gong and C. Yang, *Adv. Funct. Mater.*, 2023, **33**, 2213056.
22. X. C. Fan, F. Huang, H. Wu, H. Wang, Y. C. Cheng, J. Yu, K. Wang and X. H. Zhang, *Angew. Chem. Int. Ed.*, 2023, **62**, e202305580.
23. X. F. Luo, S. Q. Song, H. X. Ni, H. Ma, D. Yang, D. Ma, Y. X. Zheng and J. L. Zuo, *Angew. Chem. Int. Ed.*, 2022, **61**, e202209984.
24. J. Liu, Y. Zhu, T. Tsuboi, C. Deng, W. Lou, D. Wang, T. Liu and Q. Zhang, *Nat. Commun.*, 2022, **13**, 4876.
25. Y. Zhang, D. Zhang, J. Wei, X. Hong, Y. Lu, D. Hu, G. Li, Z. Liu, Y. Chen and L. Duan, *Angew. Chem. Int. Ed.*, 2020, **132**, 17652-17656.

26. Y. Hu, J. Miao, C. Zhong, Y. Zeng, S. Gong, X. Cao, X. Zhou, Y. Gu and C. Yang, *Angew. Chem. Int. Ed.*, 2023, **62**, e202302478.
27. Q. Wang, Y. Xu, T. Huang, Y. Qu, J. Xue, B. Liang and Y. Wang, *Angew. Chem. Int. Ed.*, 2023, **62**, e202301930.
28. X.-C. Fan, K. Wang, Y.-Z. Shi, Y.-C. Cheng, Y.-T. Lee, J. Yu, X.-K. Chen, C. Adachi and X.-H. Zhang, *Nat. Photonics*, 2023, **17**, 280-285.
29. S. Uemura, S. Oda, M. Hayakawa, R. Kawasumi, N. Ikeda, Y.-T. Lee, C.-Y. Chan, Y. Tsuchiya, C. Adachi and T. Hatakeyama, *J. Am. Chem. Soc.*, 2022, **145**, 1505-1511.
30. J. Kim, W. Chung, J. Kim and J. Lee, *Materials Today Energy*, 2021, **21**, 100792.
31. H. Lee, R. Braveenth, J. D. Park, C. Y. Jeon, H. S. Lee and J. H. Kwon, *ACS Appl. Mater. Interfaces*, 2022, **14**, 36927-36935.
32. H. J. Cheon, S. J. Woo, S. H. Baek, J. H. Lee and Y. H. Kim, *Adv. Mater.*, 2022, **34**, 2207416.
33. S. Oda, B. Kawakami, M. Horiuchi, Y. Yamasaki, R. Kawasumi and T. Hatakeyama, *Advanced Science*, 2023, **10**, 2205070.
34. I. S. Park, M. Yang, H. Shibata, N. Amanokura and T. Yasuda, *Adv. Mater.*, 2022, **34**, 2107951.
35. B. Lei, Z. Huang, S. Li, J. Liu, Z. Bin and J. You, *Angew. Chem. Int. Ed.*, 2023, **135**, e202218405.
